# Supplementary material for: Diastereoselective synthesis of functionalized tetrahydropyridazines containing indole scaffolds via an inverse-electron-demand aza-Diels–Alder reaction
Source: Royal Society of Chemistry journal article supplement (doi:10.1039/d1qo00623a), 2021-01-01
Supplement: d1qo00623a1.pdf [file d1qo00623a1.pdf]

*Supporting Information for*

**Diastereoselective Synthesis of Functionalized Tetrahydropyridazines Containing  
Indole Scaffolds *via* Inverse-Electron-Demand Aza-Diels–Alder Reaction**

Taotao Chen,<sup>a</sup> Chao Che,<sup>a</sup> Zhefei Guo,<sup>a</sup> Xiu-Qin Dong,<sup>\*ac</sup> Chun-Jiang Wang<sup>\*ab</sup>

<sup>a</sup> Engineering Research Center of Organosilicon Compounds & Materials, Ministry of Education, College of Chemistry and Molecular Sciences, Wuhan University, Wuhan, Hubei, 430072, P. R. China.

<sup>b</sup> Shanghai Institute of Organic Chemistry, Chinese Academy of Sciences, Shanghai 200032, China.

<sup>c</sup> Suzhou Institute of Wuhan University, Suzhou, Jiangsu, 215123, P. R. China.

E-mail address: [cjwang@whu.edu.cn](mailto:cjwang@whu.edu.cn); [xiuqindong@whu.edu.cn](mailto:xiuqindong@whu.edu.cn).

**Table of Contents**

|       |                                                                                 |     |
|-------|---------------------------------------------------------------------------------|-----|
| I.    | General remarks.....                                                            | S2  |
| II.   | General procedure for the inverse electron-demand aza-Diels-Alder reaction..... | S2  |
| III.  | Optimization reaction conditions for the asymmetric IEDDA cyclization.....      | S14 |
| IV.   | Gram-scale inverse-electron-demand aza-Diels-Alder reaction.....                | S15 |
| V.    | Synthetic transformation.....                                                   | S16 |
| VI.   | The configuration determination of <i>trans</i> - <b>3b</b> .....               | S17 |
| VII.  | Reference.....                                                                  | S18 |
| VIII. | <sup>1</sup> H NMR and <sup>13</sup> C NMR spectra.....                         | S20 |
| IX.   | HPLC spectra.....                                                               | S47 |

## I. General remarks

<sup>1</sup>H NMR spectra were recorded on a Bruker 400 MHz spectrometer in CDCl<sub>3</sub>. Chemical shifts are reported in ppm with the internal TMS signal at 0.0 ppm as a standard. The data are reported as (s = single, d = double, t = triple, q = quarte, m = multiple or unresolved, brs = broad single, coupling constant(s) in Hz, integration). <sup>13</sup>C NMR spectra were recorded on a Bruker 100 MHz spectrometer in CDCl<sub>3</sub>. Chemical shifts are reported in ppm with the internal chloroform signal at 77.0 ppm as a standard. Commercially obtained reagents were used without further purification. Solvents were purified prior to use according to the standard methods. Unless otherwise noted, all reactions were carried out under nitrogen atmosphere. All reactions were monitored by TLC with silica gel coated plates. Enantiomeric ratios were determined by chiral-phase HPLC analysis in comparison with authentic racemic materials using a chiralpak IE column. High Resolution Mass Spectra were recorded using ESI-TOF technique. 3-Vinylindoles,<sup>1</sup> azoalkenes,<sup>2</sup> were prepared according to the literature procedure.

## II. General procedure for the inverse electron-demand aza-Diels–Alder reaction

A flame dried Schlenck tube was cooled to room temperature and filled with N<sub>2</sub>. 3-vinylindoles (0.28 mmol), the azoalkene generating *in situ* from benzohydrazide (0.20 mmol), Na<sub>2</sub>CO<sub>3</sub> (0.48 mmol) and CH<sub>3</sub>CN (2.0 mL) were added into the Schlenck tube and filled with N<sub>2</sub> at room temperature. TLC analysis indicated completion of the reaction after about 30 h. Then the reaction mixture was concentrated *in vacuo* to obtain the crude product. The crude product was purified by flash silica gel chromatography to afford the product.

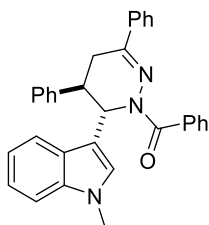

***Trans*-(6-(1-methyl-1*H*-indol-3-yl)-3,5-diphenyl-5,6-dihydropyridazin-1(4*H*)-yl)(phenyl)-methanone (3a):**

Yield (87%); 81 mg; White solid; m.p. 239-241 °C; <sup>1</sup>H NMR (400 MHz, Chloroform-*d*) δ 7.82 (d, *J*=

7.8 Hz, 1H), 7.69-7.66 (m, 4H), 7.47 – 7.39 (m, 4H), 7.38 – 7.33 (m, 6H), 7.30 – 7.25 (m, 3H), 7.23 – 7.21 (m, 1H), 6.75 (s, 1H), 6.37 (s, 1H), 4.02 (d,  $J = 7.2$  Hz, 1H), 3.66 (s, 3H), 2.95 (d,  $J = 18.3$  Hz, 1H), 2.83 (dd,  $J = 18.3, 7.0$  Hz, 1H).  $^{13}\text{C}$  NMR (100 MHz, Chloroform- $d$ )  $\delta$  170.3, 146.4, 142.3, 137.7, 137.1, 135.2, 130.3, 129.9, 129.4, 128.9, 128.5, 127.4, 127.2, 126.9, 126.1, 125.5, 125.2, 122.0, 119.4, 118.9, 113.2, 109.7, 52.1, 38.5, 32.8, 24.7. HRMS (ESI-TOF) Calcd. For  $\text{C}_{32}\text{H}_{28}\text{N}_3\text{O}$  ( $[\text{M}+\text{H}]^+$ ): 470.2227, found: 470.2212.

**opt-3a:** Yield (81%); 75 mg;  $[\alpha]_{\text{D}}^{20} = -27.2$  ( $c$  1.0,  $\text{CHCl}_3$ ); >20:1 dr, it was determined by the crude  $^1\text{H}$  NMR analysis. The product was analyzed by HPLC to determine the enantiomeric excess: 93% ee (Chiralpak IE,  $i$ -propanol/hexane = 40/60, flow rate 1.2 mL/min,  $\lambda = 230$  nm);  $t_{\text{r}} = 28.7$  and 34.0 min.

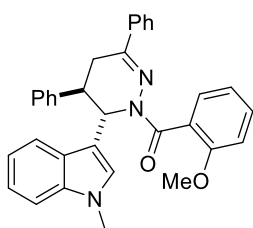

**Trans-(2-methoxyphenyl)(6-(1-methyl-1H-indol-3-yl)-3,5-diphenyl-5,6-dihydropyridazin-1(4H)-yl)methanone (3b):**

Yield (84%); 83 mg; White solid; m.p. 189-190 °C;  $^1\text{H}$  NMR (400 MHz, Chloroform- $d$ )  $\delta$  7.79 (d,  $J = 9.3$  Hz, 1H), 7.47 – 7.46 (m, 1H), 7.45-7.43 (m, 1H), 7.41 – 7.37 (m, 3H), 7.36 – 7.25 (m, 9H), 7.25 – 7.19 (m, 1H), 7.00-6.96 (m, 2H), 6.89 (s, 1H), 6.40 (s, 1H), 4.00 (d,  $J = 7.0$  Hz, 1H), 3.79 (s, 3H), 3.69 (s, 3H), 2.84 (d,  $J = 18.1$  Hz, 1H), 2.74 (dd,  $J = 18.1, 7.0$  Hz, 1H).  $^{13}\text{C}$  NMR (100 MHz, Chloroform- $d$ )  $\delta$  170.4, 156.0, 145.4, 142.6, 137.9, 137.4, 130.2, 129.1, 128.8, 128.4, 128.2, 127.4, 127.2, 127.1, 126.7, 125.34, 125.31, 121.9, 120.4, 119.3, 119.0, 113.5, 110.5, 109.7, 55.5, 51.3, 38.3, 32.9, 25.0. HRMS (ESI-TOF) Calcd. For  $\text{C}_{33}\text{H}_{30}\text{N}_3\text{O}_2$  ( $[\text{M}+\text{H}]^+$ ): 500.2333, found: 500.2322.

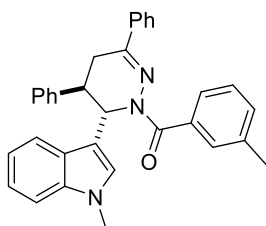

**Trans-(6-(1-methyl-1H-indol-3-yl)-3,5-diphenyl-5,6-dihydropyridazin-1(4H)-yl)(*m*-tolyl)methanone (3c):**

Yield (86%); 83 mg; White solid; m.p. 168-170 °C;  $^1\text{H}$  NMR (400 MHz, Chloroform-*d*)  $\delta$  7.88 (d,  $J = 7.8$  Hz, 1H), 7.73 (t,  $J = 3.7$  Hz, 2H), 7.58 (s, 1H), 7.54 (d,  $J = 7.0$  Hz, 1H), 7.44 – 7.38 (m, 7H), 7.37 – 7.27 (m, 6H), 6.81 (s, 1H), 6.43 (s, 1H), 4.07 (d,  $J = 7.2$  Hz, 1H), 3.70 (s, 3H), 2.98 (d,  $J = 18.3$  Hz, 1H), 2.88 (dd,  $J = 18.2, 6.9$  Hz, 1H), 2.45 (s, 3H).  $^{13}\text{C}$  NMR (100 MHz, Chloroform-*d*)  $\delta$  170.4, 146.1, 142.3, 137.6, 137.1, 137.0, 135.1, 130.9, 130.5, 129.3, 128.8, 128.4, 127.13, 127.10, 126.9, 126.0, 125.5, 125.2, 122.0, 119.3, 118.9, 113.2, 109.6, 52.0, 38.4, 32.7, 24.7, 21.4. HRMS (ESI-TOF) Calcd. For  $\text{C}_{33}\text{H}_{30}\text{N}_3\text{O}$  ( $[\text{M}+\text{H}]^+$ ): 484.2383, found: 484.2375.

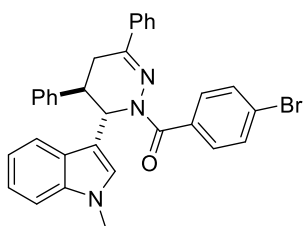

***Trans*-(4-bromophenyl)(6-(1-methyl-1*H*-indol-3-yl)-3,5-diphenyl-5,6-dihydropyridazin-1(4*H*)-yl)methanone (3d):**

Yield (81%); 89 mg; White solid; m.p. 190-192 °C;  $^1\text{H}$  NMR (400 MHz, Chloroform-*d*)  $\delta$  7.81 (d,  $J = 7.9$  Hz, 1H), 7.67 (dd,  $J = 7.9, 2.9$  Hz, 2H), 7.55 (s, 4H), 7.41 – 7.33 (m, 7H), 7.32 – 7.25 (m, 3H), 7.23 – 7.20 (m, 1H), 6.73 (s, 1H), 6.34 (s, 1H), 4.00 (d,  $J = 7.3$  Hz, 1H), 3.66 (s, 3H), 2.96 (d,  $J = 18.4$  Hz, 1H), 2.84 (dd,  $J = 18.3, 7.0$  Hz, 1H).  $^{13}\text{C}$  NMR (100 MHz, Chloroform-*d*)  $\delta$  169.3, 147.1, 142.2, 137.7, 136.9, 134.0, 131.7, 130.7, 129.6, 129.0, 128.7, 127.3, 126.9, 126.0, 125.6, 125.2, 124.9, 122.1, 119.5, 118.9, 113.1, 109.8, 52.3, 38.5, 32.9, 24.7. HRMS (ESI-TOF) Calcd. For  $\text{C}_{32}\text{H}_{26}\text{BrN}_3\text{ONa}$  ( $[\text{M}+\text{Na}]^+$ ): 570.1151, found: 570.1136.

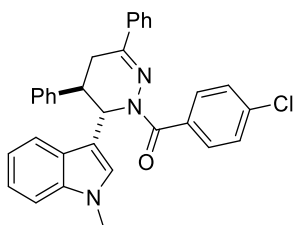

***Trans*-(4-chlorophenyl)(6-(1-methyl-1*H*-indol-3-yl)-3,5-diphenyl-5,6-dihydropyridazin-1(4*H*)-yl)methanone (3e):**

Yield (82%); 82 mg; White solid; m.p. 210-212 °C;  $^1\text{H}$  NMR (400 MHz, Chloroform-*d*)  $\delta$  7.73 (d,  $J = 7.6$  Hz, 1H), 7.59 (dd,  $J = 7.6, 2.9$  Hz, 2H), 7.55 (d,  $J = 8.3$  Hz, 2H), 7.31 – 7.26 (m, 9H), 7.25 – 7.16

(m, 3H), 7.13 – 7.10 (m, 1H), 6.65 (s, 1H), 6.27 (s, 1H), 3.92 (d,  $J = 7.3$  Hz, 1H), 3.57 (s, 3H), 2.88 (d,  $J = 18.3$  Hz, 1H), 2.75 (dd,  $J = 18.4, 7.0$  Hz, 1H).  $^{13}\text{C}$  NMR (100 MHz, Chloroform-*d*)  $\delta$  169.1, 146.9, 142.1, 137.6, 136.9, 136.4, 133.5, 131.5, 129.5, 128.9, 128.6, 127.6, 127.2, 126.8, 125.9, 125.5, 125.2, 122.1, 119.4, 118.8, 113.0, 109.7, 52.3, 38.4, 32.8, 24.7. HRMS (ESI-TOF) Calcd. For  $\text{C}_{32}\text{H}_{27}\text{ClN}_3\text{O}$  ( $[\text{M}+\text{H}]^+$ ): 504.1837, found: 504.1825.

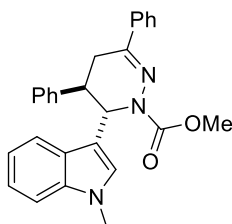

***Trans*-methyl 6-(1-methyl-1*H*-indol-3-yl)-3,5-diphenyl-5,6-dihydropyridazine-1(4*H*)-carboxylate (3f):**

Yield (86%); 72 mg; White solid; m.p. 220-222 °C;  $^1\text{H}$  NMR (400 MHz, Chloroform-*d*)  $\delta$  7.89 (dd,  $J = 7.9, 1.8$  Hz, 2H), 7.78 (d,  $J = 7.9$  Hz, 1H), 7.46 – 7.40 (m, 3H), 7.36 – 7.27 (m, 7H), 7.25 – 7.20 (m, 1H), 6.83 (s, 1H), 5.99 (s, 1H), 3.87 (d,  $J = 7.2$  Hz, 1H), 3.81 (s, 3H), 3.70 (s, 3H), 2.88 (d,  $J = 18.3$  Hz, 1H), 2.77 (dd,  $J = 18.3, 7.1$  Hz, 1H).  $^{13}\text{C}$  NMR (100 MHz, Chloroform-*d*)  $\delta$  155.2, 147.1, 142.5, 137.52, 137.46, 129.3, 128.9, 128.5, 127.1, 126.9, 125.9, 125.6, 125.1, 122.0, 119.3, 118.7, 114.1, 109.7, 53.8, 53.7, 38.7, 32.8, 24.5. HRMS (ESI-TOF) Calcd. For  $\text{C}_{27}\text{H}_{26}\text{N}_3\text{O}_2$  ( $[\text{M}+\text{H}]^+$ ): 424.2020, found: 424.2010.

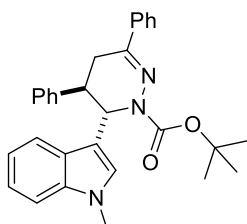

***Trans*-tert-butyl 6-(1-methyl-1*H*-indol-3-yl)-3,5-diphenyl-5,6-dihydropyridazine-1(4*H*)-carboxylate (3g):**

Yield (84%); 78 mg; White solid; m.p. 159-160 °C;  $^1\text{H}$  NMR (400 MHz, Chloroform-*d*)  $\delta$  7.93 (d,  $J = 8.0$  Hz, 2H), 7.77 (d,  $J = 7.2$  Hz, 1H), 7.46 – 7.39 (m, 3H), 7.38 – 7.28 (m, 7H), 7.24 (d,  $J = 7.9$  Hz, 1H), 6.86 (s, 1H), 5.96 (s, 1H), 3.86 (d,  $J = 6.8$  Hz, 1H), 3.70 (s, 3H), 2.83 (d,  $J = 18.2$  Hz, 1H), 2.79 (dd,  $J = 17.7, 6.2$  Hz, 1H), 1.43 (s, 9H).  $^{13}\text{C}$  NMR (100 MHz, Chloroform-*d*)  $\delta$  153.4, 146.1, 142.9,

137.6, 137.4, 129.0, 128.7, 128.3, 126.93, 126.88, 126.0, 125.5, 125.2, 121.8, 119.2, 118.6, 114.4, 109.6, 81.3, 53.4, 38.8, 32.7, 28.1, 24.4. HRMS (ESI-TOF) Calcd. For  $C_{30}H_{32}N_3O_2$  ( $[M+H]^+$ ): 466.2489, found: 466.2481.

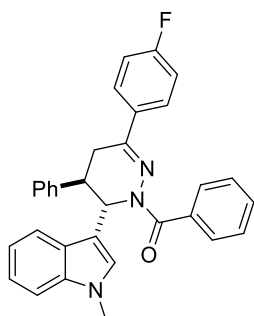

***Trans*-(3-(4-fluorophenyl)-6-(1-methyl-1*H*-indol-3-yl)-5-phenyl-5,6-dihydropyridazin-1(4*H*)-yl)-(phenyl)methanone (3h):**

Yield (80%); 78 mg; White solid; m.p. 217-218 °C;  $^1H$  NMR (400 MHz, Chloroform-*d*)  $\delta$  7.81 (d,  $J$  = 7.9 Hz, 1H), 7.66 – 7.61 (m, 4H), 7.47 – 7.41 (m, 3H), 7.36 (d,  $J$  = 5.0 Hz, 4H), 7.30 – 7.26 (m, 3H), 7.23 – 7.18 (m, 1H), 7.02 (t,  $J$  = 8.6 Hz, 2H), 6.74 (s, 1H), 6.36 (s, 1H), 4.01 (d,  $J$  = 7.0 Hz, 1H), 3.67 (s, 3H), 2.90 (d,  $J$  = 18.2 Hz, 1H), 2.80 (dd,  $J$  = 18.2, 6.9 Hz, 1H).  $^{13}C$  NMR (100 MHz, Chloroform-*d*)  $\delta$  170.3, 163.5 (d,  $J$  = 248.2 Hz), 145.4, 142.2, 137.7, 135.2, 133.3 (d,  $J$  = 3.1 Hz), 130.3, 129.9, 129.0, 127.5, 127.4, 127.3, 126.9, 126.0, 125.2, 122.1, 119.4, 119.0, 115.5 (d,  $J$  = 21.6 Hz), 113.1, 109.7, 52.1, 38.4, 32.9, 24.8. HRMS (ESI-TOF) Calcd. For  $C_{32}H_{27}FN_3O$  ( $[M+H]^+$ ): 488.2133, found: 488.2122.

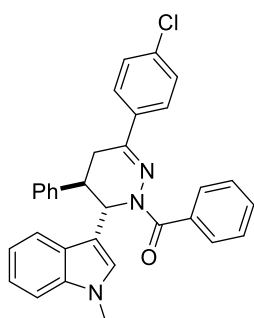

***Trans*-(3-(4-chlorophenyl)-6-(1-methyl-1*H*-indol-3-yl)-5-phenyl-5,6-dihydropyridazin-1(4*H*)-yl)-(phenyl)methanone (3i):**

Yield (78%); 78 mg; White solid; m.p. 229-230 °C;  $^1H$  NMR (400 MHz, Chloroform-*d*)  $\delta$  7.81 (d,  $J$  = 7.9 Hz, 1H), 7.65 (d,  $J$  = 7.4 Hz, 2H), 7.58 (d,  $J$  = 8.8 Hz, 2H), 7.49 – 7.38 (m, 3H), 7.35 – 7.33 (m,

4H), 7.32 – 7.24 (m, 5H), 7.15-7.13 (m, 1H), 6.73 (s, 1H), 6.36 (s, 1H), 4.01 (d,  $J = 7.1$  Hz, 1H), 3.66 (s, 3H), 2.89 (d,  $J = 18.2$  Hz, 1H), 2.79 (dd,  $J = 18.2, 6.9$  Hz, 1H).  $^{13}\text{C}$  NMR (100 MHz, Chloroform- $d$ )  $\delta$  170.3, 145.2, 142.1, 137.7, 135.5, 135.3, 135.1, 130.3, 129.8, 128.9, 128.7, 127.4, 127.3, 126.8, 126.7, 125.9, 125.1, 122.1, 119.4, 118.9, 113.1, 109.7, 52.1, 38.3, 32.8, 24.6. HRMS (ESI-TOF) Calcd. For  $\text{C}_{32}\text{H}_{27}\text{ClN}_3\text{O}$  ( $[\text{M}+\text{H}]^+$ ): 504.1837, found: 504.1826.

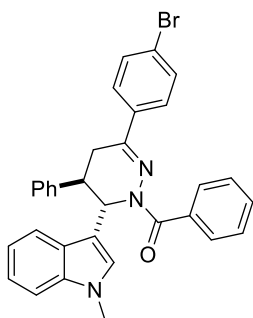

***Trans*-(3-(4-bromophenyl)-6-(1-methyl-1*H*-indol-3-yl)-5-phenyl-5,6-dihydropyridazin-1(4*H*)-yl)(phenyl)methanone (3j):**

Yield (84%); 92 mg; White solid; m.p. 238-240 °C;  $^1\text{H}$  NMR (400 MHz, Chloroform- $d$ )  $\delta$  7.81 (d,  $J = 7.8$  Hz, 1H), 7.64 (d,  $J = 7.4$  Hz, 2H), 7.53 – 7.46 (m, 6H), 7.41 (t,  $J = 7.3$  Hz, 2H), 7.36 – 7.35 (m, 4H), 7.31 – 7.28 (m, 2H), 7.23 – 7.19 (m, 1H), 6.73 (s, 1H), 6.36 (s, 1H), 4.01 (d,  $J = 7.1$  Hz, 1H), 3.68 (s, 3H), 2.89 (d,  $J = 18.2$  Hz, 1H), 2.79 (dd,  $J = 18.3, 6.9$  Hz, 1H).  $^{13}\text{C}$  NMR (100 MHz, Chloroform- $d$ )  $\delta$  170.4, 145.3, 142.1, 137.7, 136.0, 135.1, 131.7, 130.4, 129.9, 129.0, 127.5, 127.3, 127.0, 126.8, 126.0, 125.2, 123.7, 122.1, 119.4, 118.9, 113.1, 109.7, 52.2, 38.4, 32.9, 24.6. HRMS (ESI-TOF) Calcd. For  $\text{C}_{32}\text{H}_{27}\text{BrN}_3\text{O}$  ( $[\text{M}+\text{H}]^+$ ): 548.1332, found: 548.1316.

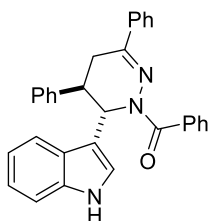

***Trans*-(6-(1*H*-indol-3-yl)-3,5-diphenyl-5,6-dihydropyridazin-1(4*H*)-yl)(phenyl)methanone (3k):**

Yield (80%); 72 mg; White solid; m.p. 182-183 °C;  $^1\text{H}$  NMR (400 MHz, Chloroform- $d$ )  $\delta$  8.23 (s, 1H), 7.82 (d,  $J = 8.8$  Hz, 1H), 7.66 – 7.62 (m, 4H), 7.50 – 7.40 (m, 3H), 7.40 – 7.32 (m, 7H), 7.31 – 7.27 (m, 2H), 7.24 – 7.18 (m, 2H), 6.80 (d,  $J = 1.5$  Hz, 1H), 6.40 (s, 1H), 4.01 (d,  $J = 5.4$  Hz, 1H), 2.94 (d,  $J =$

18.3 Hz, 1H), 2.78 (dd,  $J = 18.3, 7.1$  Hz, 1H).  $^{13}\text{C}$  NMR (100 MHz, Chloroform- $d$ )  $\delta$  170.4, 146.5, 142.2, 137.0, 136.9, 135.2, 130.2, 129.8, 129.4, 128.9, 128.5, 127.4, 127.2, 126.8, 125.5, 124.7, 122.3, 121.5, 119.7, 118.6, 114.6, 111.6, 52.1, 38.3, 24.7. HRMS (ESI-TOF) Calcd. For  $\text{C}_{31}\text{H}_{26}\text{N}_3\text{O}$  ( $[\text{M}+\text{H}]^+$ ): 456.2070, found: 456.2061.

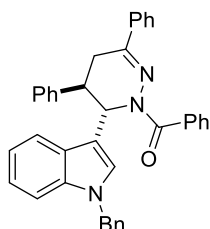

***Trans*-(6-(1-benzyl-1*H*-indol-3-yl)-3,5-diphenyl-5,6-dihydropyridazin-1(4*H*)-yl)(phenyl)methanone (3l):**

Yield (83%); 90 mg; White solid; m.p. 160-161 °C;  $^1\text{H}$  NMR (400 MHz, Chloroform- $d$ )  $\delta$  7.84 – 7.82 (m, 1H), 7.67 – 7.59 (m, 4H), 7.47 – 7.30 (m, 10H), 7.27 – 7.21 (m, 3H), 7.20 – 7.14 (m, 4H), 6.99 – 6.94 (m, 2H), 6.86 (s, 1H), 6.41 (s, 1H), 5.23 – 5.10 (m, 2H), 4.02 (d,  $J = 7.3$  Hz, 1H), 2.92 (d,  $J = 18.3$  Hz, 1H), 2.80 (dd,  $J = 18.3, 7.1$  Hz, 1H).  $^{13}\text{C}$  NMR (100 MHz, Chloroform- $d$ )  $\delta$  170.3, 146.6, 142.2, 137.2, 137.1, 135.2, 130.2, 129.8, 129.3, 128.9, 128.6, 128.4, 127.5, 127.3, 127.2, 126.9, 126.5, 125.7, 125.5, 125.4, 122.2, 119.6, 119.0, 113.8, 110.2, 52.0, 50.0, 38.5, 24.9. HRMS (ESI-TOF) Calcd. For  $\text{C}_{38}\text{H}_{32}\text{N}_3\text{O}$  ( $[\text{M}+\text{H}]^+$ ): 546.2540, found: 546.2530.

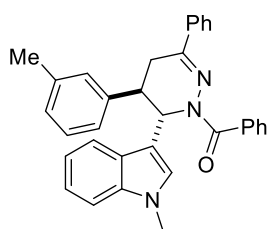

***Trans*-(6-(1-methyl-1*H*-indol-3-yl)-3-phenyl-5-(*m*-tolyl)-5,6-dihydropyridazin-1(4*H*)-yl)-(phenyl)methanone (3m):**

Yield (84%); 80 mg; White solid; m.p. 148-150 °C;  $^1\text{H}$  NMR (400 MHz, Chloroform- $d$ )  $\delta$  7.82 (d,  $J = 7.8$  Hz, 1H), 7.70 – 7.65 (m, 4H), 7.49 – 7.38 (m, 3H), 7.35 – 7.21 (m, 8H), 7.13-7.05 (m, 2H), 6.74 (s, 1H), 6.34 (s, 1H), 3.97 (d,  $J = 7.2$  Hz, 1H), 3.64 (s, 3H), 2.91 (d,  $J = 18.3$  Hz, 1H), 2.81 (dd,  $J = 18.3, 7.0$  Hz, 1H), 2.35 (s, 3H).  $^{13}\text{C}$  NMR (100 MHz, Chloroform- $d$ )  $\delta$  170.3, 146.5, 142.3, 138.4, 137.6, 137.1, 135.3, 130.2, 129.9, 129.3, 128.7, 128.4, 127.94, 127.91, 127.3, 126.0, 125.5, 125.2, 123.5,



122.0, 119.3, 118.9, 113.2, 109.6, 52.1, 38.4, 32.7, 24.9, 21.6. HRMS (ESI-TOF) Calcd. For C<sub>33</sub>H<sub>30</sub>N<sub>3</sub>O ([M+H]<sup>+</sup>): 484.2383, found: 484.2375.

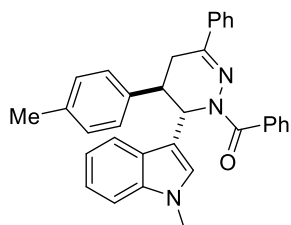

***Trans*-(6-(1-methyl-1*H*-indol-3-yl)-3-phenyl-5-(*p*-tolyl)-5,6-dihydropyridazin-1(4*H*)-yl)-(phenyl)methanone (3n):**

Yield (89%); 85 mg; White solid; m.p. 190-191 °C; <sup>1</sup>H NMR (400 MHz, Chloroform-*d*) δ 7.81 (d, *J* = 7.8 Hz, 1H), 7.70 – 7.64 (m, 4H), 7.45 – 7.39 (m, 3H), 7.33 – 7.19 (m, 8H), 7.14 (d, *J* = 7.9 Hz, 2H), 6.74 (s, 1H), 6.35 (s, 1H), 3.97 (d, *J* = 7.4 Hz, 1H), 3.62 (s, 3H), 2.90 (d, *J* = 18.3 Hz, 1H), 2.80 (dd, *J* = 18.3, 7.0 Hz, 1H), 2.30 (s, 3H). <sup>13</sup>C NMR (100 MHz, Chloroform-*d*) δ 170.3, 146.4, 139.2, 137.6, 137.1, 136.7, 135.2, 130.2, 129.9, 129.5, 129.3, 128.4, 127.3, 126.7, 126.0, 125.5, 125.2, 121.9, 119.3, 118.9, 113.2, 109.6, 52.1, 38.0, 32.7, 24.8, 21.0. HRMS (ESI-TOF) Calcd. For C<sub>33</sub>H<sub>30</sub>N<sub>3</sub>O ([M+H]<sup>+</sup>): 484.2383, found: 484.2373.

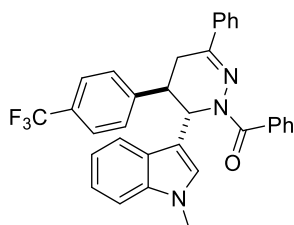

***Trans*-(6-(1-methyl-1*H*-indol-3-yl)-3-phenyl-5-(4-(trifluoromethyl)phenyl)-5,6-dihydropyridazin-1(4*H*)-yl)(phenyl)methanone (3o):**

Yield (80%); 85 mg; White solid; m.p. 189-191 °C; <sup>1</sup>H NMR (400 MHz, Chloroform-*d*) δ 7.79 (d, *J* = 7.9 Hz, 1H), 7.71 – 7.65 (m, 4H), 7.61 – 7.56 (m, 2H), 7.51 – 7.40 (m, 5H), 7.38 – 7.25 (m, 5H), 7.24 – 7.19 (m, 1H), 6.77 (s, 1H), 6.39 (s, 1H), 4.06 (d, *J* = 6.5 Hz, 1H), 3.66 (s, 3H), 2.93 (d, *J* = 18.2 Hz, 1H), 2.86 (dd, *J* = 18.3, 6.5 Hz, 1H). <sup>13</sup>C NMR (100 MHz, Chloroform-*d*) δ 170.3, 146.3, 145.9, 137.7, 136.8, 134.9, 130.4, 129.9, 129.5 (q, *J* = 32.4 Hz), 128.6, 127.5, 127.4, 126.1, 125.9 (q, *J* = 3.7 Hz), 125.5, 125.1, 124.0 (q, *J* = 270.0 Hz), 122.1, 119.5, 118.7, 112.7, 109.8, 51.6, 38.4, 32.8, 24.6. HRMS (ESI-TOF) Calcd. For C<sub>33</sub>H<sub>27</sub>F<sub>3</sub>N<sub>3</sub>O ([M+H]<sup>+</sup>): 538.2101, found: 538.2087.

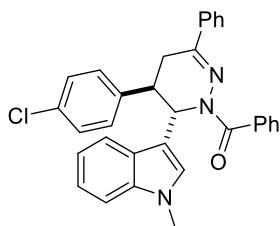

***Trans*-(5-(4-chlorophenyl)-6-(1-methyl-1*H*-indol-3-yl)-3-phenyl-5,6-dihydropyridazin-1(4*H*)-yl)(phenyl)methanone (3p):**

Yield (80%); 80 mg; White solid; m.p. 174-176 °C; <sup>1</sup>H NMR (400 MHz, Chloroform-*d*) δ 7.78 (d, *J* = 7.9 Hz, 1H), 7.71 – 7.63 (m, 4H), 7.50 – 7.39 (m, 3H), 7.34 – 7.30 (m, 4H), 7.29 – 7.17 (m, 6H), 6.73 (s, 1H), 6.34 (s, 1H), 3.97 – 3.94 (m, 1H), 3.64 (s, 3H), 2.88 (d, *J* = 18.3 Hz, 1H), 2.81 (dd, *J* = 18.3, 6.5 Hz, 1H). <sup>13</sup>C NMR (100 MHz, Chloroform-*d*) δ 169.3, 145.0, 139.7, 136.6, 135.9, 134.0, 131.9, 129.4, 128.9, 128.5, 128.0, 127.5, 127.3, 126.4, 125.0, 124.5, 124.1, 121.1, 118.4, 117.8, 111.8, 108.7, 50.9, 36.9, 31.8, 23.7. HRMS (ESI-TOF) Calcd. For C<sub>32</sub>H<sub>27</sub>ClN<sub>3</sub>O ([M+H]<sup>+</sup>): 504.1837, found: 504.1826.

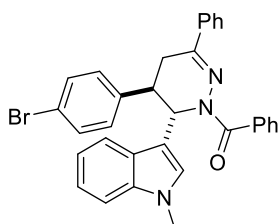

***Trans*-(5-(4-bromophenyl)-6-(1-methyl-1*H*-indol-3-yl)-3-phenyl-5,6-dihydropyridazin-1(4*H*)-yl)(phenyl)methanone (3q):**

Yield (78%); 85 mg; White solid; m.p. 184-185 °C; <sup>1</sup>H NMR (400 MHz, Chloroform-*d*) δ 7.77 (d, *J* = 5.3 Hz, 1H), 7.69 – 7.64 (m, 4H), 7.47 – 7.41 (m, 5H), 7.35 – 7.21 (m, 7H), 7.20 (dd, *J* = 6.6, 1.6 Hz, 1H), 6.74 (s, 1H), 6.35 (s, 1H), 3.96 (d, *J* = 4.5 Hz, 1H), 3.64 (s, 3H), 2.88 (d, *J* = 16.5 Hz, 1H), 2.81 (dd, *J* = 18.3, 6.5 Hz, 1H). <sup>13</sup>C NMR (100 MHz, Chloroform-*d*) δ 170.2, 146.0, 141.2, 137.6, 136.8, 135.0, 131.9, 130.4, 129.9, 129.5, 128.6, 128.5, 127.4, 126.0, 125.4, 125.1, 122.0, 121.0, 119.4, 118.7, 112.8, 109.7, 51.8, 38.0, 32.8, 24.6. HRMS (ESI-TOF) Calcd. For C<sub>32</sub>H<sub>27</sub>BrN<sub>3</sub>O ([M+H]<sup>+</sup>): 548.1332, found: 548.1320.

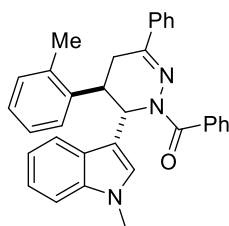

***Trans*-(6-(1-methyl-1*H*-indol-3-yl)-3-phenyl-5-(*o*-tolyl)-5,6-dihydropyridazin-1(4*H*)-yl)-(phenyl)methanone (3r):**

Yield (72%); 69 mg; White solid; m.p. 194-196 °C; <sup>1</sup>H NMR (400 MHz, Chloroform-*d*) δ 7.79 (d, *J* = 7.9 Hz, 1H), 7.62 (dd, *J* = 10.4, 6.6 Hz, 4H), 7.36 (dt, *J* = 14.2, 7.0 Hz, 3H), 7.30 – 7.19 (m, 6H), 7.17 – 7.06 (m, 4H), 6.71 (s, 1H), 6.17 (s, 1H), 4.10 (d, *J* = 6.7 Hz, 1H), 3.59 (s, 3H), 2.84 (dd, *J* = 18.4, 6.7 Hz, 1H), 2.77 (d, *J* = 18.3 Hz, 1H), 2.63 (s, 3H). <sup>13</sup>C NMR (100 MHz, Chloroform-*d*) δ 170.4, 147.3, 140.7, 137.6, 137.1, 135.6, 135.3, 131.0, 130.3, 130.0, 129.4, 128.5, 127.4, 127.2, 126.7, 126.6, 125.6, 125.4, 125.3, 121.9, 119.4, 119.1, 113.4, 109.7, 50.4, 34.9, 32.9, 25.4, 20.6. HRMS (ESI-TOF) Calcd. For C<sub>33</sub>H<sub>30</sub>N<sub>3</sub>O ([M+H]<sup>+</sup>): 484.2383, found: 484.2373.

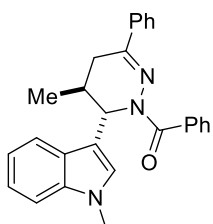

***Trans*-5-methyl-6-(1-methyl-1*H*-indol-3-yl)-3-phenyl-5,6-dihydropyridazin-1(4*H*)-yl(phenyl)methanone (3s):**

Yield (82%); 66 mg; White solid; m.p. 153-155 °C; 1.5:1 dr; major: <sup>1</sup>H NMR (400 MHz, Chloroform-*d*) δ 7.83 (s, 1H), 7.74 (d, *J* = 6.6 Hz, 2H), 7.62 – 7.57 (m, 2H), 7.44 – 7.39 (m, 3H), 7.33 – 7.29 (m, 3H), 7.20 (s, 1H), 7.16 – 7.09 (m, 2H), 6.69 (s, 1H), 6.07 (s, 1H), 3.62 (s, 3H), 2.74 (d, *J* = 19.3 Hz, 1H), 2.38 (dd, *J* = 17.4, 5.7 Hz, 2H), 1.26 (d, *J* = 6.8 Hz, 3H). <sup>13</sup>C NMR (100 MHz, Chloroform-*d*) δ 170.6, 146.8, 137.6, 136.5, 135.4, 130.0, 129.9, 129.1, 128.3, 127.4, 126.6, 125.5, 125.4, 121.8, 119.4, 119.0, 113.6, 109.5, 50.0, 32.7, 27.9, 26.6, 18.9. minor: <sup>1</sup>H NMR (400 MHz, Chloroform-*d*) δ 7.76 (s, 1H), 7.62 – 7.58 (m, 2H), 7.57 (s, 1H), 7.39 (t, *J* = 7.9 Hz, 3H), 7.29 – 7.26 (m, 2H), 7.18 (dd, *J* = 8.0, 3.6 Hz, 4H), 7.11 (d, *J* = 8.4 Hz, 1H), 6.66 (s, 1H), 6.14 (s, 1H), 3.57 (s, 3H), 2.74 (d, *J* = 17.0 Hz, 1H), 2.45 (dd, *J* = 17.8, 6.1 Hz, 2H), 0.98 (d, *J* = 6.4 Hz, 3H). <sup>13</sup>C NMR (100 MHz, Chloroform-*d*) δ 169.5, 145.6, 137.6, 137.2, 135.6, 130.2, 129.9, 129.1, 128.4, 127.9, 127.2, 125.7, 125.3, 121.6, 119.6, 119.1,

111.5, 109.2, 52.1, 32.7, 28.1, 27.5, 18.4. HRMS (ESI-TOF) Calcd. For  $C_{27}H_{25}N_3ONa$  ( $[M+Na]^+$ ): 430.1890, found: 430.1881.

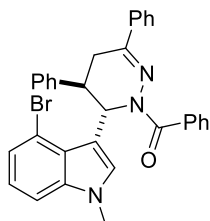

**Trans-(6-(4-bromo-1-methyl-1H-indol-3-yl)-3,5-diphenyl-5,6-dihydropyridazin-1(4H)-yl)(phenyl)methanone (3t):**

Yield (78%); 85 mg; White solid; m.p. 236-237 °C;  $^1H$  NMR (400 MHz, Chloroform-*d*)  $\delta$  7.62 – 7.58 (m, 4H), 7.40 – 7.32 (m, 5H), 7.28 – 7.22 (m, 6H), 7.14 (d,  $J = 5.4$  Hz, 2H), 7.00 (t,  $J = 7.9$  Hz, 1H), 6.85 (s, 1H), 6.71 (s, 1H), 4.08 (d,  $J = 6.7$  Hz, 1H), 3.54 (s, 3H), 2.89 (d,  $J = 18.2$  Hz, 1H), 2.74 (dd,  $J = 18.2, 6.9$  Hz, 1H).  $^{13}C$  NMR (100 MHz, Chloroform-*d*)  $\delta$  170.1, 146.4, 142.1, 138.8, 137.1, 135.2, 130.3, 130.0, 129.3, 128.7, 128.5, 127.6, 127.4, 127.03, 127.01, 125.5, 124.3, 123.9, 122.8, 114.7, 113.9, 108.8, 50.6, 38.8, 33.1, 24.8. HRMS (ESI-TOF) Calcd. For  $C_{32}H_{26}BrN_3ONa$  ( $[M+Na]^+$ ): 570.1151, found: 570.1141.

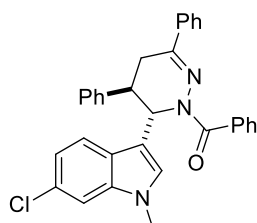

**Trans-(6-(6-chloro-1-methyl-1H-indol-3-yl)-3,5-diphenyl-5,6-dihydropyridazin-1(4H)-yl)(phenyl)methanone (3u):**

Yield (78%); 78 mg; White solid; m.p. 206-208 °C;  $^1H$  NMR (400 MHz, Chloroform-*d*)  $\delta$  7.71 – 7.65 (m, 5H), 7.50 – 7.39 (m, 3H), 7.37 – 7.32 (m, 7H), 7.30 – 7.25 (m, 2H), 7.18 – 7.15 (m, 1H), 6.75 (s, 1H), 6.31 (s, 1H), 3.94 (d,  $J = 7.5$  Hz, 1H), 3.62 (s, 3H), 2.96 (d,  $J = 18.3$  Hz, 1H), 2.81 (dd,  $J = 18.3, 7.1$  Hz, 1H).  $^{13}C$  NMR (100 MHz, Chloroform-*d*)  $\delta$  170.4, 146.4, 142.1, 138.1, 137.0, 135.1, 130.4, 130.0, 129.5, 129.0, 128.6, 128.3, 127.5, 127.3, 126.9, 126.8, 125.6, 123.8, 120.1, 119.8, 113.6, 109.8, 51.9, 38.6, 33.0, 24.7. HRMS (ESI-TOF) Calcd. For  $C_{32}H_{27}ClN_3O$  ( $[M+H]^+$ ): 504.1837, found: 504.1830.

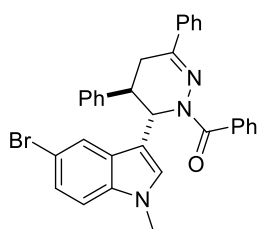

***Trans*-(6-(5-bromo-1-methyl-1*H*-indol-3-yl)-3,5-diphenyl-5,6-dihydropyridazin-1(4*H*)-yl)(phenyl)methanone (3v):**

Yield (83%); 90 mg; White solid; m.p. 246-248 °C; <sup>1</sup>H NMR (400 MHz, Chloroform-*d*) δ 7.92 (s, 1H), 7.68 – 7.66 (m, 4H), 7.49 – 7.33 (m, 11H), 7.28 – 7.25 (m, 1H), 7.16 (d, *J* = 8.7 Hz, 1H), 6.74 (s, 1H), 6.29 (s, 1H), 3.94 (d, *J* = 7.4 Hz, 1H), 3.63 (s, 3H), 2.97 (d, *J* = 18.4 Hz, 1H), 2.80 (dd, *J* = 18.3, 7.1 Hz, 1H). <sup>13</sup>C NMR (100 MHz, Chloroform-*d*) δ 170.3, 146.4, 141.9, 137.0, 136.4, 135.0, 130.4, 130.0, 129.5, 129.0, 128.6, 127.5, 127.4, 127.3, 126.90, 126.88, 125.6, 125.0, 121.5, 112.94, 112.88, 111.3, 51.8, 38.4, 33.0, 24.8. HRMS (ESI-TOF) Calcd. For C<sub>32</sub>H<sub>27</sub>BrN<sub>3</sub>O ([M+H]<sup>+</sup>): 548.1332, found: 548.1319.

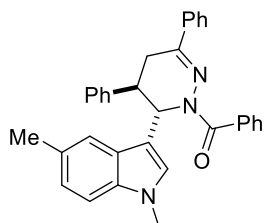

***Trans*-(6-(1,5-dimethyl-1*H*-indol-3-yl)-3,5-diphenyl-5,6-dihydropyridazin-1(4*H*)-yl)-(phenyl)methanone (3w):**

Yield (74%); 71 mg; White solid; m.p. 192-194 °C; <sup>1</sup>H NMR (400 MHz, Chloroform-*d*) δ 7.67 (t, *J* = 6.8 Hz, 4H), 7.58 (s, 1H), 7.47 – 7.36 (m, 6H), 7.35 – 7.32 (m, 4H), 7.25 (t, *J* = 7.1 Hz, 1H), 7.18 (d, *J* = 8.3 Hz, 1H), 7.09 (d, *J* = 6.9 Hz, 1H), 6.70 (s, 1H), 6.35 (s, 1H), 4.00 (d, *J* = 7.2 Hz, 1H), 3.61 (s, 3H), 2.94 (d, *J* = 18.2 Hz, 1H), 2.83 (dd, *J* = 18.3, 6.9 Hz, 1H), 2.52 (s, 3H). <sup>13</sup>C NMR (100 MHz, Chloroform-*d*) δ 170.2, 146.2, 142.3, 137.1, 136.1, 135.2, 130.2, 129.9, 129.3, 128.9, 128.53, 128.45, 127.3, 127.1, 126.9, 126.0, 125.5, 125.4, 123.6, 118.5, 112.6, 109.4, 52.0, 38.2, 32.8, 24.7, 21.6. HRMS (ESI-TOF) Calcd. For C<sub>33</sub>H<sub>30</sub>N<sub>3</sub>O ([M+H]<sup>+</sup>): 484.2383, found: 484.2375.

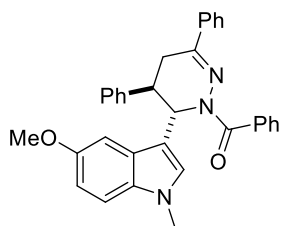

***Trans*-6-(5-methoxy-1-methyl-1*H*-indol-3-yl)-3,5-diphenyl-5,6-dihydropyridazin-1(4*H*)-yl)-(phenyl)methanone (3x):**

Yield (80%); 79 mg; White solid; m.p. 192-194 °C; <sup>1</sup>H NMR (400 MHz, Chloroform-*d*) δ 7.69 – 7.65 (m, 4H), 7.50 – 7.39 (m, 4H), 7.37 – 7.32 (m, 7H), 7.23 – 7.22 (m, 1H), 7.19 (d, *J* = 8.8 Hz, 1H), 6.94 – 6.92 (m, 1H), 6.74 (s, 1H), 6.32 (s, 1H), 3.96 (d, *J* = 7.1 Hz, 1H), 3.89 (s, 3H), 3.64 (s, 3H), 2.96 (d, *J* = 18.3 Hz, 1H), 2.86 (dd, *J* = 18.3, 6.9 Hz, 1H). <sup>13</sup>C NMR (100 MHz, Chloroform-*d*) δ 170.4, 154.0, 146.4, 142.4, 137.1, 135.3, 133.1, 130.3, 130.0, 129.4, 129.0, 128.5, 127.4, 127.2, 127.0, 126.9, 126.6, 125.5, 112.8, 112.1, 110.5, 101.1, 56.1, 52.0, 38.5, 33.0, 24.9. HRMS (ESI-TOF) Calcd. For C<sub>33</sub>H<sub>30</sub>N<sub>3</sub>O<sub>2</sub> ([M+H]<sup>+</sup>): 500.2333, found: 500.2320.

### III. Optimization reaction conditions for the asymmetric IEDDA cyclization

As shown in Table S1, a series of chiral oxazoline ligands was firstly examined in the Cu-catalyzed inverse-electron-demand aza-Diels-Alder (IEDDA) reaction between *in situ* generated azoalkene and 3-vinylindole **1a** in the presence of Na<sub>2</sub>CO<sub>3</sub>, and ligand **L3** could deliver the desired product **opt-3a** with the best result in 72% yield and 75% ee (entry 3). Subsequently, the solvent effect was investigated in the Cu(OTf)<sub>2</sub>/**L3** catalytic system, this transformation was proceeded smoothly in several solvents, such as THF, MeCN and DCE (entries 5-7), and high yield and good enantioselectivity was given in MeCN (entry 6, 96% yield, 89% ee). It was found that another metal precursor Cu(MeCN)<sub>4</sub>BF<sub>4</sub> also can provide similar reaction result with Cu(OTf)<sub>2</sub> (entry 9 vs entry 6, 93% yield, 89% ee). In addition, when the azoalkene was generated *in situ* from (*Z*)-*N'*-(2-chloro-1-phenylethylidene)benzohydrazide in the presence of Na<sub>2</sub>CO<sub>3</sub>, good yield and better enantioselectivity was afforded (entry 10, 81% yield, 93% ee). Some bases, such as NaHCO<sub>3</sub>, K<sub>2</sub>CO<sub>3</sub> and K<sub>3</sub>PO<sub>4</sub>, were also inspected into this asymmetric cycloaddition reaction, poor to good reaction results could be provided (entries 11-13, 32-82% yields, 15%-89% ee).

Table S1. Optimization reaction conditions for the asymmetric IEDDA cyclization.<sup>a</sup>

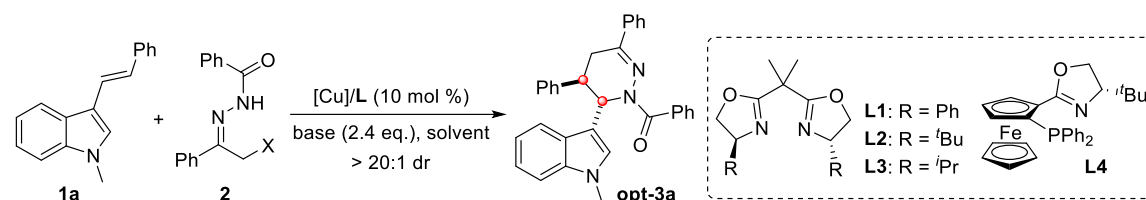

| entry | ligand | [Cu]                                  | X  | base                            | solvent | yield (%) <sup>b</sup> | ee (%) <sup>c</sup> |
|-------|--------|---------------------------------------|----|---------------------------------|---------|------------------------|---------------------|
| 1     | L1     | Cu(OTf) <sub>2</sub>                  | Br | Na <sub>2</sub> CO <sub>3</sub> | DCM     | 75                     | 21                  |
| 2     | L2     | Cu(OTf) <sub>2</sub>                  | Br | Na <sub>2</sub> CO <sub>3</sub> | DCM     | 76                     | 30                  |
| 3     | L3     | Cu(OTf) <sub>2</sub>                  | Br | Na <sub>2</sub> CO <sub>3</sub> | DCM     | 72                     | 75                  |
| 4     | L4     | Cu(OTf) <sub>2</sub>                  | Br | Na <sub>2</sub> CO <sub>3</sub> | DCM     | 57                     | 19                  |
| 5     | L3     | Cu(OTf) <sub>2</sub>                  | Br | Na <sub>2</sub> CO <sub>3</sub> | THF     | 75                     | 0                   |
| 6     | L3     | Cu(OTf) <sub>2</sub>                  | Br | Na <sub>2</sub> CO <sub>3</sub> | MeCN    | 96                     | 89                  |
| 7     | L3     | Cu(OTf) <sub>2</sub>                  | Br | Na <sub>2</sub> CO <sub>3</sub> | DCE     | 91                     | 31                  |
| 8     | L3     | (CuOTf•1/2Ph) <sub>2</sub>            | Br | Na <sub>2</sub> CO <sub>3</sub> | MeCN    | 67                     | 73                  |
| 9     | L3     | Cu(MeCN) <sub>4</sub> BF <sub>4</sub> | Br | Na <sub>2</sub> CO <sub>3</sub> | MeCN    | 93                     | 89                  |
| 10    | L3     | Cu(OTf) <sub>2</sub>                  | Cl | Na <sub>2</sub> CO <sub>3</sub> | MeCN    | 81                     | 93                  |
| 11    | L3     | Cu(OTf) <sub>2</sub>                  | Cl | NaHCO <sub>3</sub>              | MeCN    | 82                     | 89                  |
| 12    | L3     | Cu(OTf) <sub>2</sub>                  | Cl | K <sub>2</sub> CO <sub>3</sub>  | MeCN    | 76                     | 73                  |
| 13    | L3     | Cu(OTf) <sub>2</sub>                  | Cl | K <sub>3</sub> PO <sub>4</sub>  | MeCN    | 32                     | 15                  |

<sup>a</sup> Reaction conditions: **1a** (0.14 mmol), **2a** (0.10 mmol), [Cu] (0.010 mmol), ligand (0.012 mmol), base (0.24 mmol) in 1 mL solvent at room temperature for 24 h. The dr value was determined by the crude <sup>1</sup>H NMR analysis. <sup>b</sup> Yield was obtained after chromatographic purification. <sup>c</sup> The ee value was determined by HPLC analysis.

#### IV. Gram-scale inverse-electron-demand aza-Diels-Alder reaction

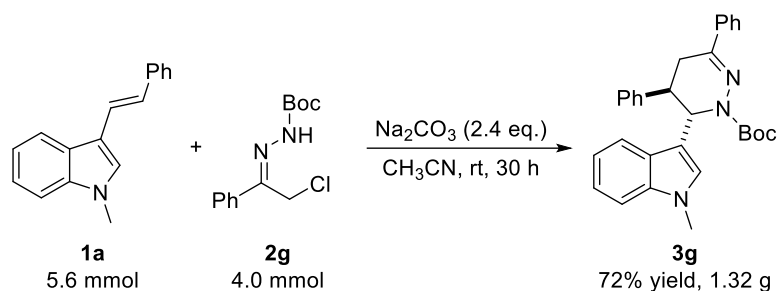

A flame dried Schlenk tube was cooled to room temperature and filled with N<sub>2</sub>. 3-vinylindole **1a** (5.6 mmol), the azoalkene generating *in situ* from benzohydrazide **2g** (4.0 mmol), Na<sub>2</sub>CO<sub>3</sub> (9.6 mmol) and CH<sub>3</sub>CN (40 mL) were added into the Schlenk tube and filled with N<sub>2</sub> at room temperature. TLC analysis indicated completion of the reaction after about 30 h. Then the reaction mixture was

concentrated *in vacuo* to obtain the crude product. The crude product was purified by flash silica gel chromatography to afford the product **3g** in 72% yield (1.32 g).

## V. Synthetic transformation

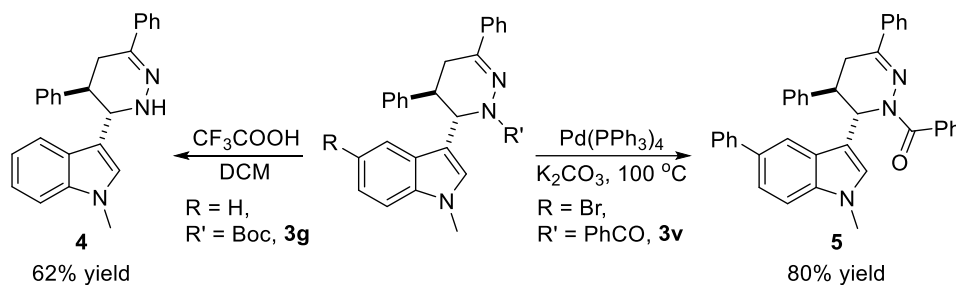

To a solution of **3g** (0.2 mmol) in 1 mL CH<sub>2</sub>Cl<sub>2</sub> was added CF<sub>3</sub>COOH (0.6 mmol) at room temperature, and the corresponding mixture was stirred at this temperature until the reaction completed (monitoring by TLC). The solvent was removed under reduced pressure and the residue was purified by column chromatography (PE:EA = 3:1) on silica gel to afford desired compound **4** in 62% yield.

To a solution of **3v** (0.10 mmol) in THF/H<sub>2</sub>O (4:1 v/v) was added Pd(PPh<sub>3</sub>)<sub>4</sub> (0.01 mmol), phenylboronic acid (0.20 mmol) and K<sub>2</sub>CO<sub>3</sub> (20.7 mg, 0.15 mmol). The resulting mixture was stirred at 100 °C for 24 h under argon atmosphere. After the completion of the reaction which was indicated by TLC, water (5 mL) was added to the reaction mixture, which was then extracted with ethyl acetate (3 × 5 mL). The combined organic layers were dried and concentrated under the reduced pressure to give a residue. Finally, the residue was purified by preparative thin layer chromatography (PE:DCM = 1:1) on silica gel to afford pure product **5** in 80% yield.

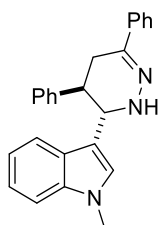

### **Trans-3-(4,6-diphenyl-2,3,4,5-tetrahydropyridazin-3-yl)-1-methyl-1H-indole (4):**

Yield (62%); 45 mg; Yellow liquid; <sup>1</sup>H NMR (400 MHz, Chloroform-*d*) δ 7.74 (d, *J* = 7.1 Hz, 2H), 7.68 (d, *J* = 7.9 Hz, 1H), 7.36 (t, *J* = 7.3 Hz, 2H), 7.29 (t, *J* = 8.0 Hz, 2H), 7.19 – 7.15 (m, 4H), 7.12 – 7.04 (m, 4H), 6.83 (s, 1H), 4.57 (d, *J* = 9.7 Hz, 1H), 3.61 (s, 3H), 3.06 (dd, *J* = 18.2, 6.4 Hz, 1H), 2.91



(dd,  $J = 18.2, 10.0$  Hz, 1H).  $^{13}\text{C}$  NMR (100 MHz, Chloroform- $d$ )  $\delta$  143.7, 143.0, 138.1, 137.0, 128.5, 128.4, 127.9, 127.69, 127.65, 126.61, 126.60, 124.5, 121.6, 119.6, 119.1, 112.7, 109.3, 55.4, 43.1, 32.7, 32.0. HRMS (ESI-TOF) Calcd. For  $\text{C}_{25}\text{H}_{24}\text{N}_3$  ( $[\text{M}+\text{H}]^+$ ): 366.1965, found: 366.1957.

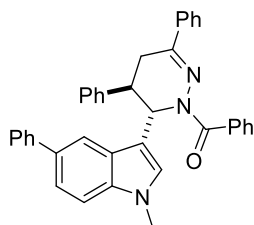

***Trans*-(6-(1-methyl-5-phenyl-1H-indol-3-yl)-3,5-diphenyl-5,6-dihydropyridazin-1(4H)-yl)(phenyl)methanone (5):**

Yield (80%); 44 mg; White solid; m.p. 214-216 °C;  $^1\text{H}$  NMR (400 MHz, Chloroform- $d$ )  $\delta$  7.98 (s, 1H), 7.69 (d,  $J = 6.9$  Hz, 6H), 7.54 – 7.38 (m, 7H), 7.38 – 7.31 (m, 8H), 7.28 – 7.25 (m, 1H), 6.79 (s, 1H), 6.42 (s, 1H), 4.03 (d,  $J = 7.1$  Hz, 1H), 3.69 (s, 3H), 2.97 (d,  $J = 18.3$  Hz, 1H), 2.87 (dd,  $J = 18.3, 6.9$  Hz, 1H).  $^{13}\text{C}$  NMR (100 MHz, Chloroform- $d$ )  $\delta$  170.4, 146.4, 142.5, 142.2, 137.3, 137.1, 135.2, 133.1, 130.4, 130.0, 129.4, 129.0, 128.8, 128.6, 127.6, 127.4, 127.3, 126.9, 126.8, 126.5, 125.7, 125.6, 122.1, 117.5, 113.7, 110.0, 52.0, 38.6, 33.0, 24.9. HRMS (ESI-TOF) Calcd. For  $\text{C}_{38}\text{H}_{32}\text{N}_3\text{O}$  ( $[\text{M}+\text{H}]^+$ ): 546.2467, found: 546.2520.

**VI. The configuration determination of *trans*-3b**

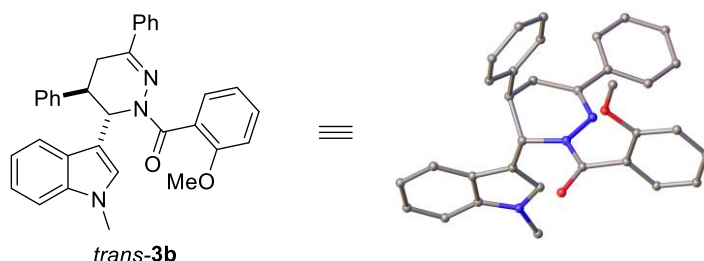

In a 10 mL oven-dried glass sample vial, 40 mg pure **3b** and 1.0 mL  $\text{CH}_2\text{Cl}_2$  were added, and then 3 mL *n*-hexane was slowly added to the solution, which was sealed with perforated paper at room temperature to grow crystals.<sup>3</sup>

Bond precision: C-C = 0.0077 Å

Wavelength = 0.71073

Cell: a = 10.973(3)

b = 27.895(9)

c = 9.090(3)

|                                |               |                   |                                   |
|--------------------------------|---------------|-------------------|-----------------------------------|
|                                | alpha = 90    | beta = 112.891(6) | gamma = 90                        |
| Temperature:                   | 200 K         |                   |                                   |
|                                | Calculated    |                   | Reported                          |
| Volume                         | 2563.3(14)    |                   | 2563.3(14)                        |
| Space group                    | P 21/c        |                   | P 1 21/c 1                        |
| Hall group                     | -P 2ybc       |                   | -P 2ybc                           |
| Moiety formula                 | C33 H29 N3 O2 |                   | C33 H29 N3 O2                     |
| Sum formula                    | C33 H29 N3 O2 |                   | C33 H29 N3 O2                     |
| Mr                             | 499.59        |                   | 499.59                            |
| Dx,g cm-3                      | 1.295         |                   | 1.295                             |
| Z                              | 4             |                   | 4                                 |
| Mu (mm-1)                      | 0.081         |                   | 0.081                             |
| F000                           | 1056.0        |                   | 1056.0                            |
| F000'                          | 1056.41       |                   |                                   |
| h,k,lmax                       | 13,33,10      |                   | 13,33,10                          |
| Nref 4514                      |               |                   | 4384                              |
| Tmin,Tmax                      | 0.994, 0.996  |                   | 0.511, 0.745                      |
| Tmin'                          | 0.992         |                   |                                   |
| Correction method = #          | Reported      | T                 | Limits: Tmin = 0.511 Tmax = 0.745 |
| AbsCorr = MULTI-SCAN           |               |                   |                                   |
| Data completeness = 0.971      |               |                   | Theta(max) = 25.000               |
| R(reflections) = 0.1067( 3111) |               |                   | wR2(reflections) = 0.2845( 4384)  |
| S = 1.193                      |               |                   | Npar = 345                        |

## VII. Reference

1. Gao H.-Y.; Wu X.-X.; Zhang J.-L. Gold(I)-Catalyzed, Highly Diastereoselective, Tandem Heterocyclizations/[3+2] Cycloadditions: Synthesis of Highly Substituted Cyclopenta[c]furans. *Chem. Eur. J.* **2011**, *17*, 2838.
2. Chen J.-R.; Dong W.-R.; M. Candy; Pan F.-F.; M. Jörres; C. Bolm. Enantioselective Synthesis of

Dihydropyrazoles by Formal [4+1] Cycloaddition of in Situ-Derived Azoalkenes and Sulfur Ylides. *J. Am. Chem. Soc.* **2012**, *134*, 6924.

3. CCDC 2077849 (**3b**) contains the supplementary crystallographic data for this paper.

# VIII. <sup>1</sup>H NMR and <sup>13</sup>C NMR spectra

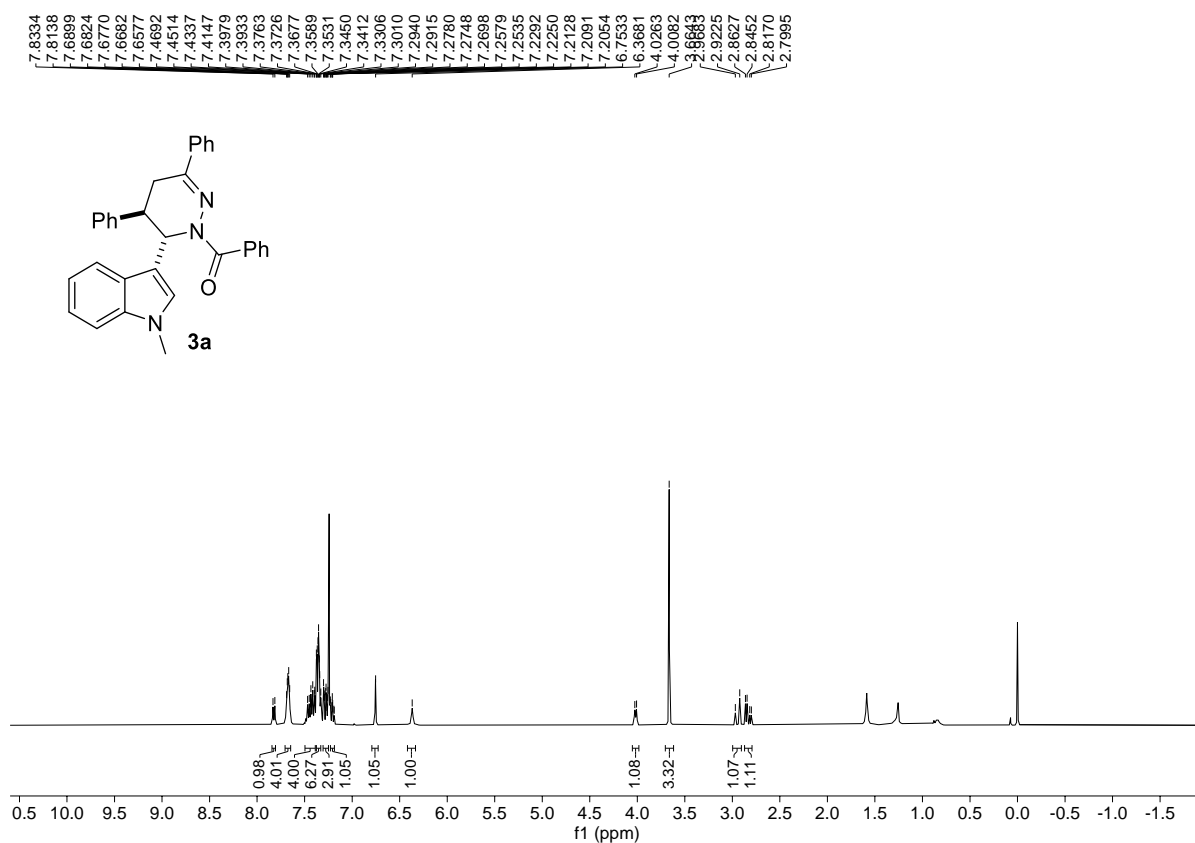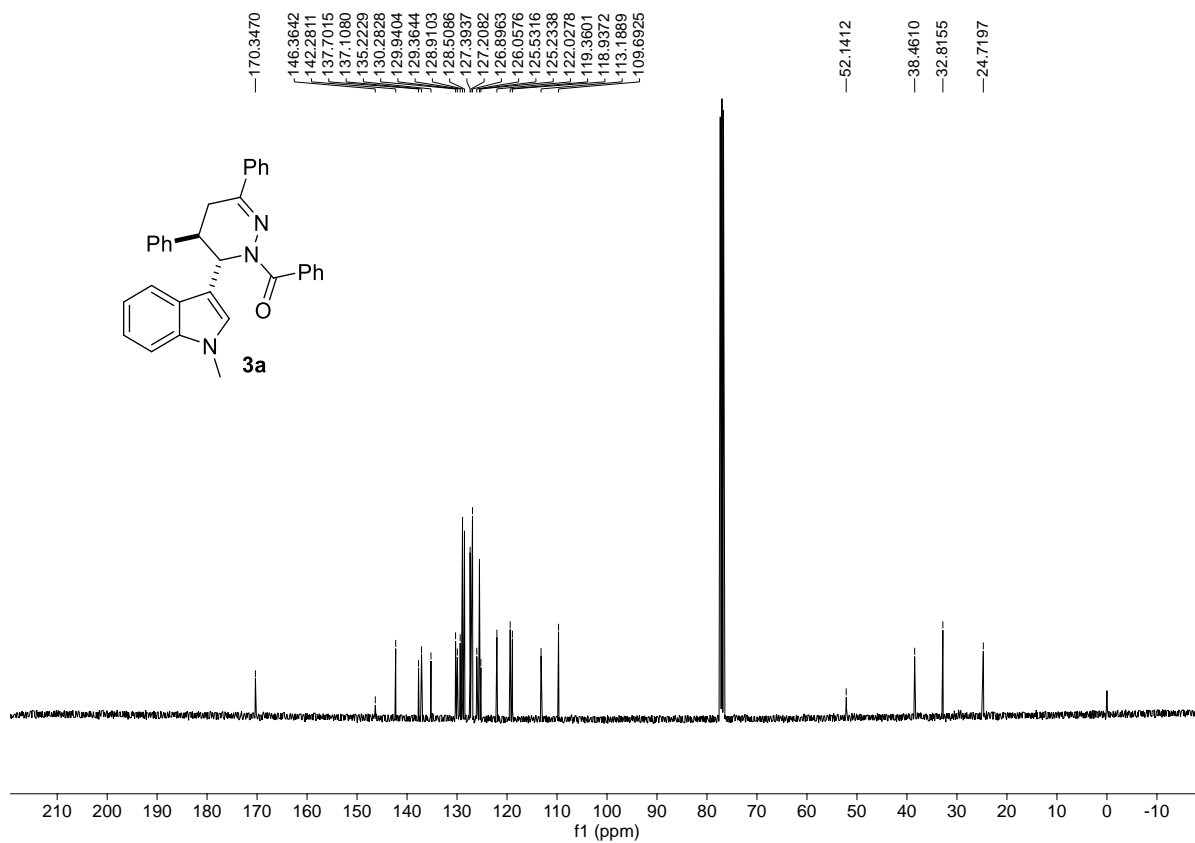

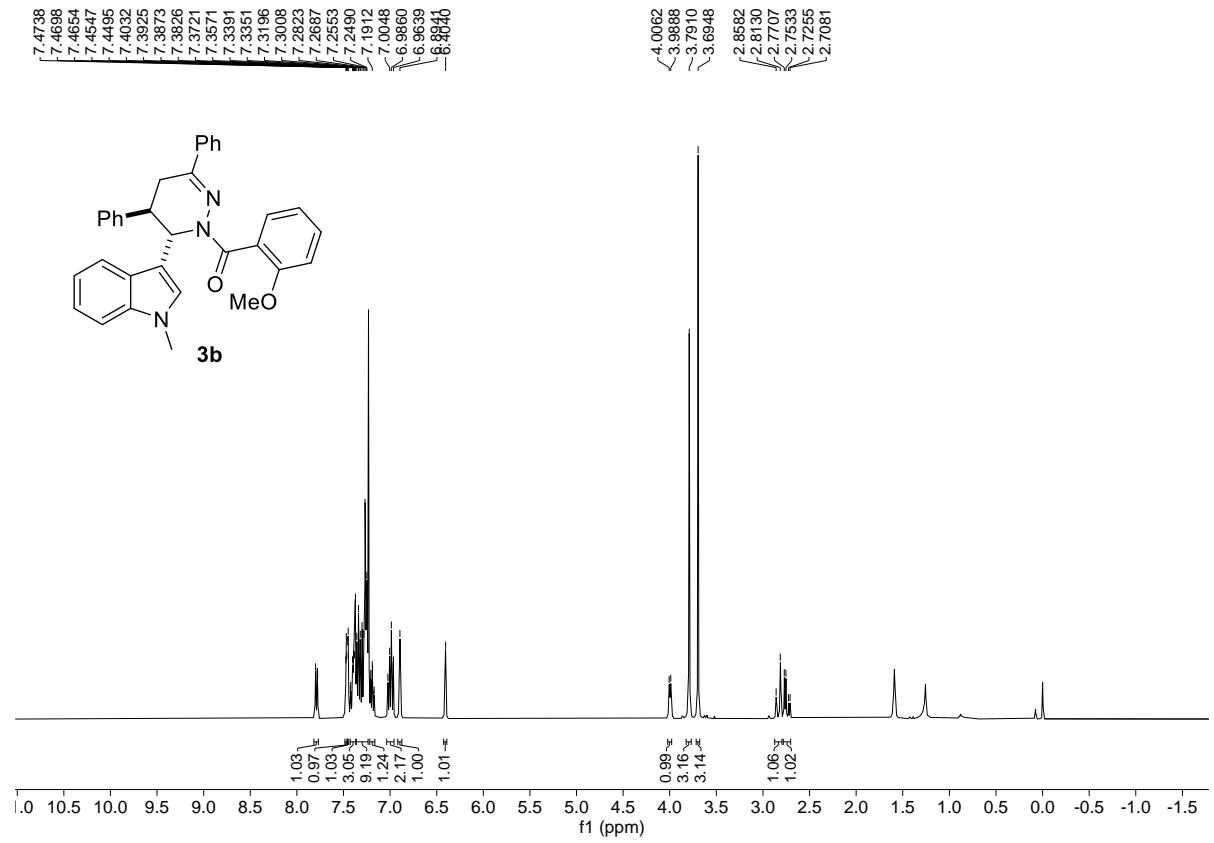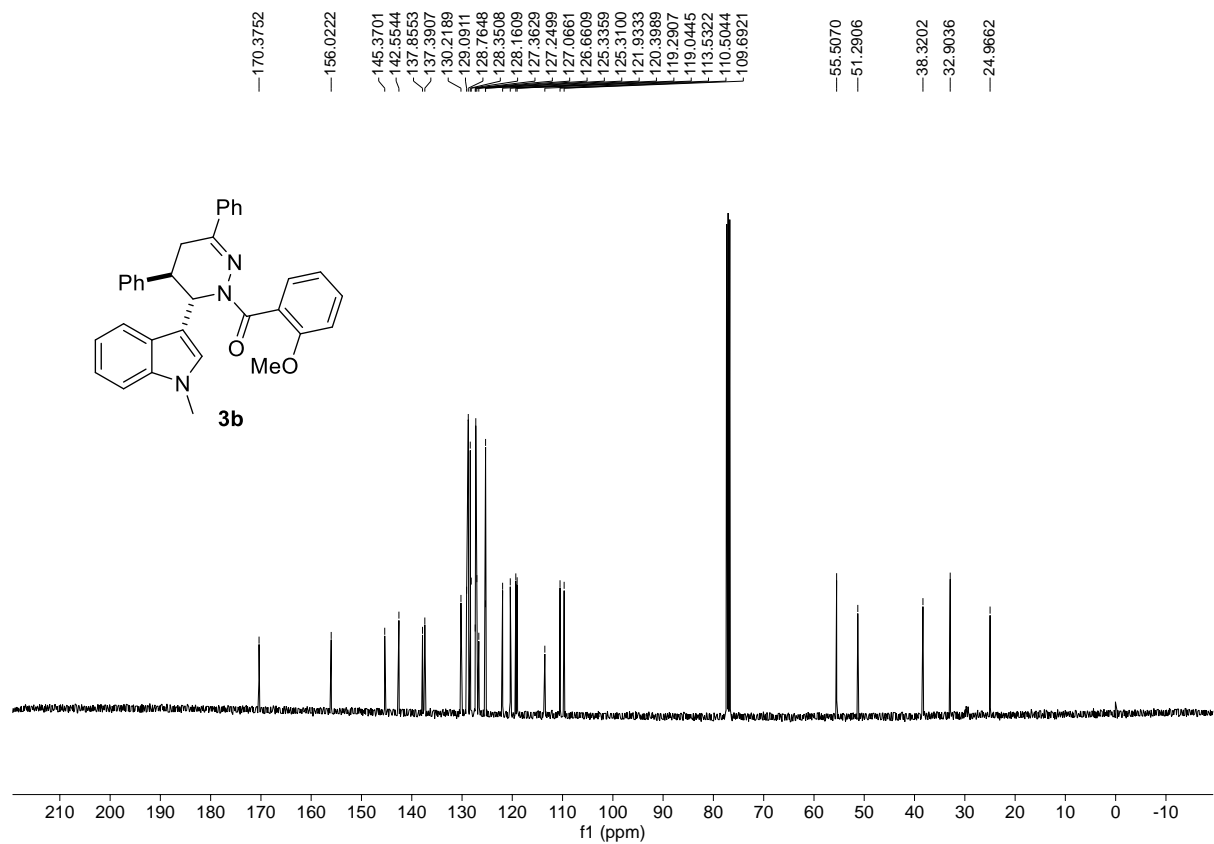

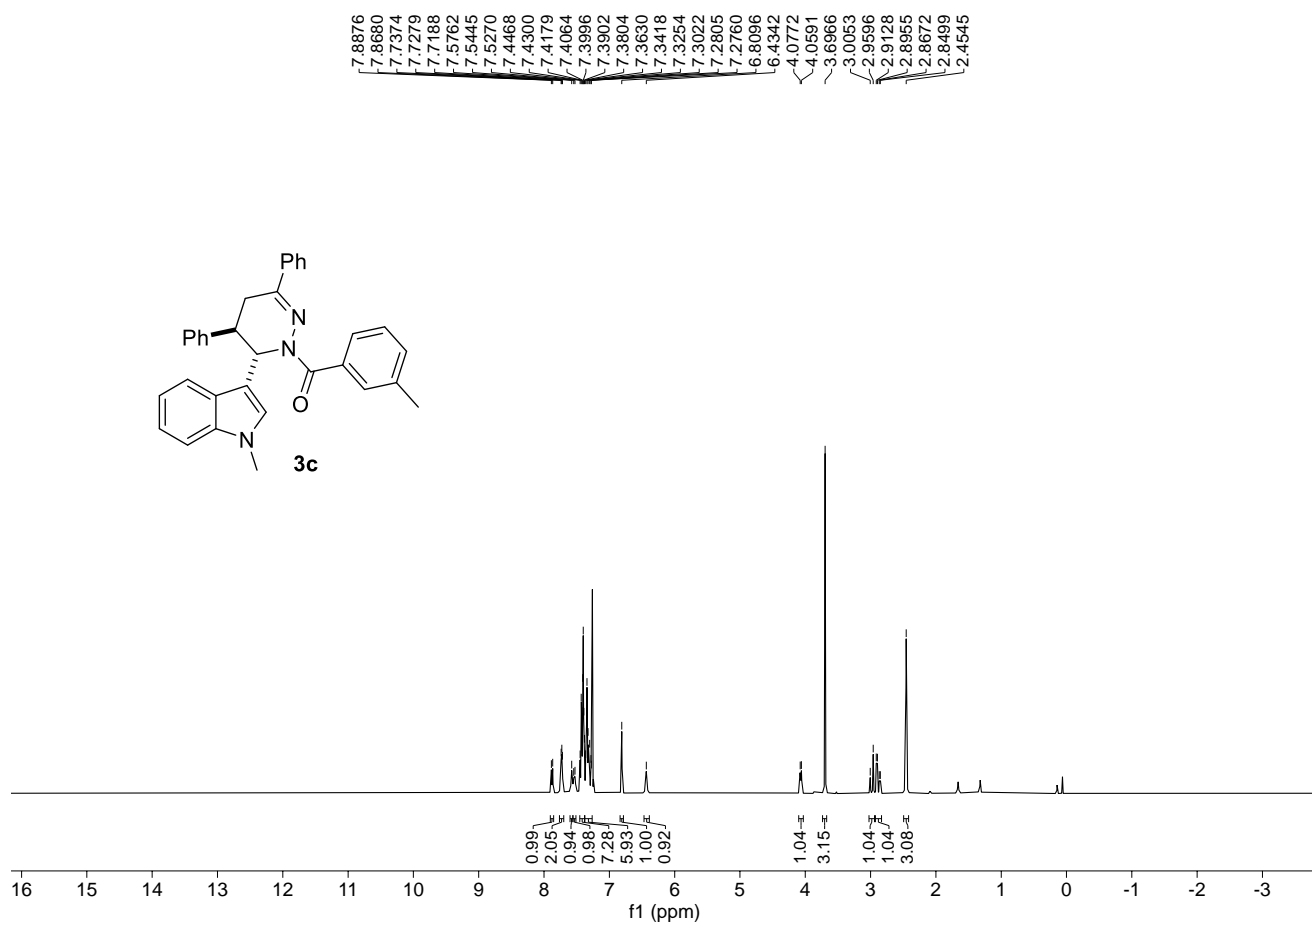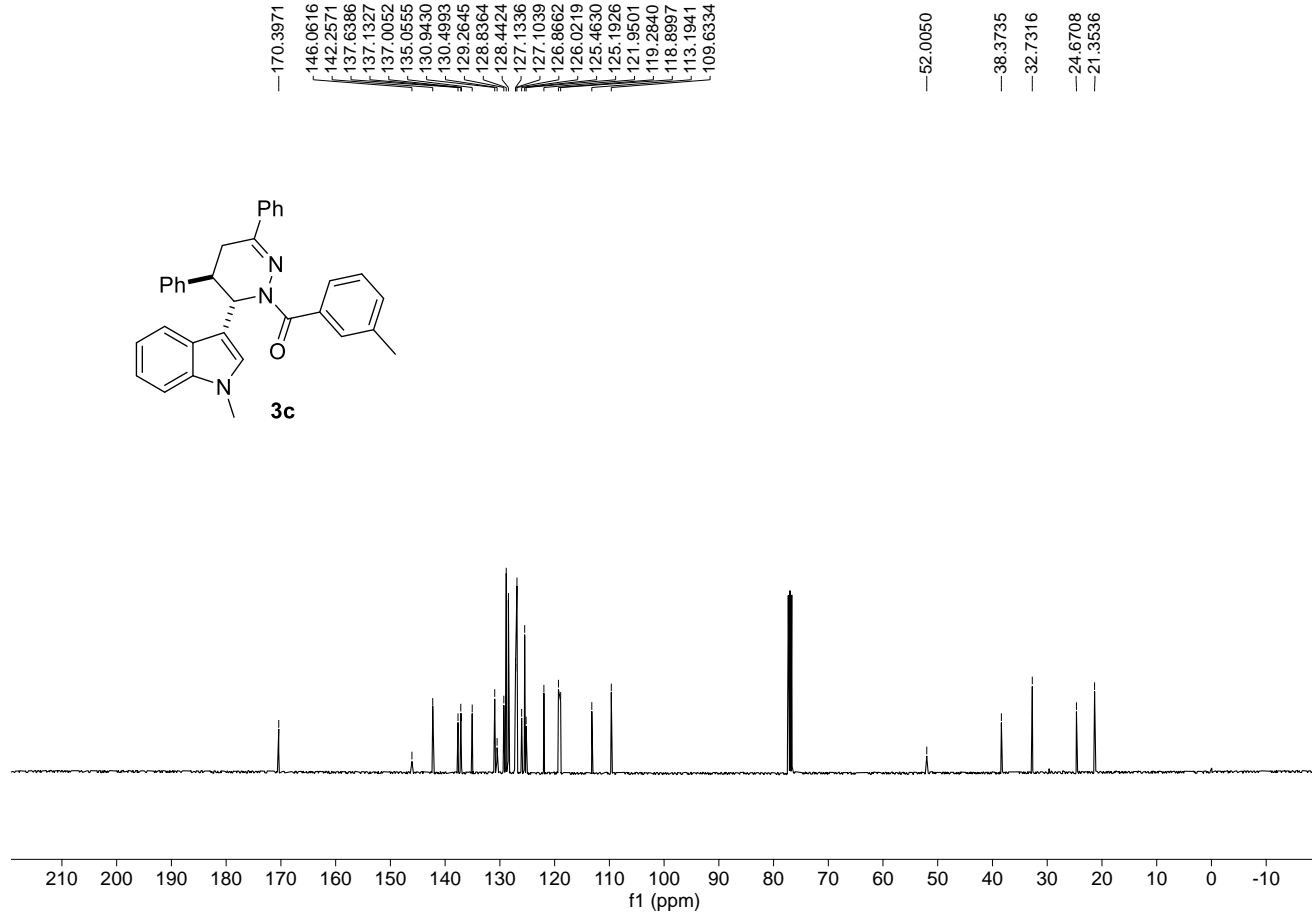

7.8200  
7.8003  
7.6846  
7.6787  
7.6689  
7.6602  
7.5539  
7.3911  
7.3838  
7.3749  
7.3549  
7.3484  
7.3401  
7.3185  
7.2944  
7.2776  
7.2574  
7.2501  
7.2276  
7.2232  
7.2076  
6.7286  
6.3444

4.0121  
3.9939  
3.607  
2.9862  
2.9403  
2.8678  
2.8502  
2.8220  
2.8044

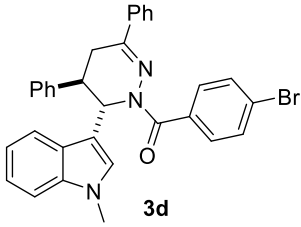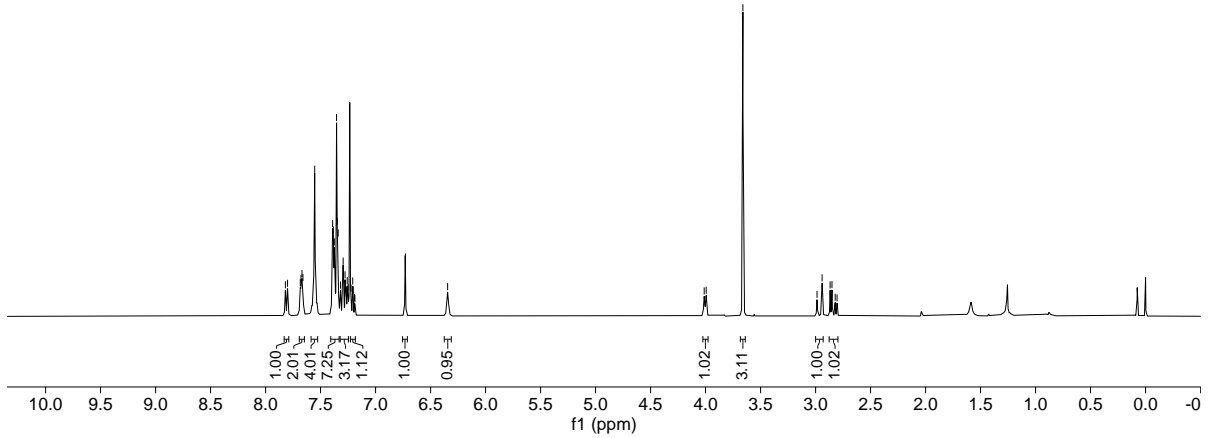

169.2524  
147.0549  
142.1600  
137.6985  
136.9214  
134.0488  
131.7406  
130.6757  
129.6231  
128.9771  
128.6638  
127.3111  
126.8587  
125.9738  
125.5616  
125.2328  
124.9171  
122.1422  
119.4732  
118.9189  
113.0750  
109.7684  
52.3245  
38.4808  
32.8693  
24.7479

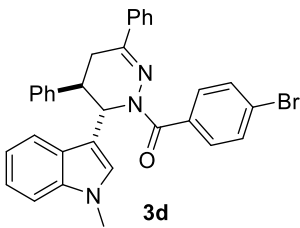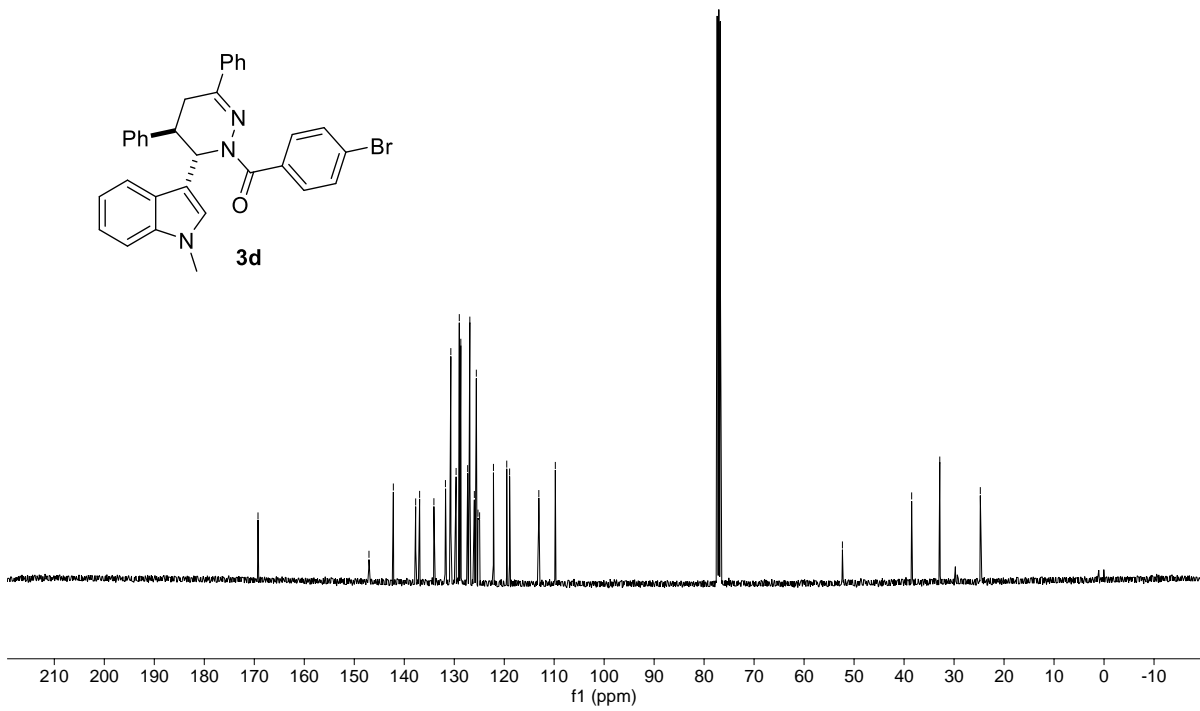

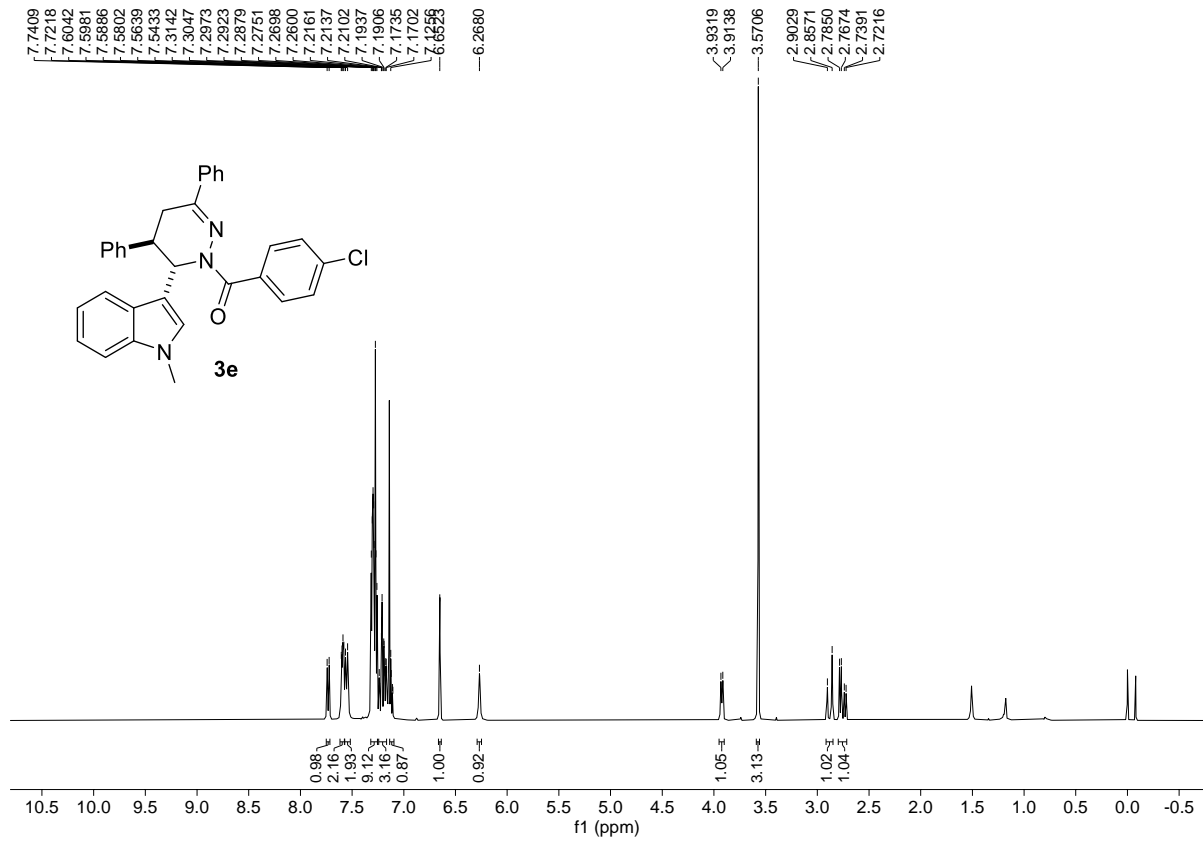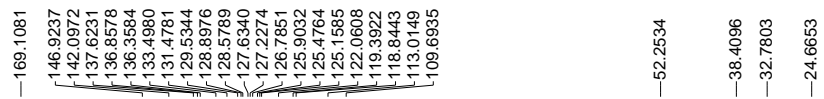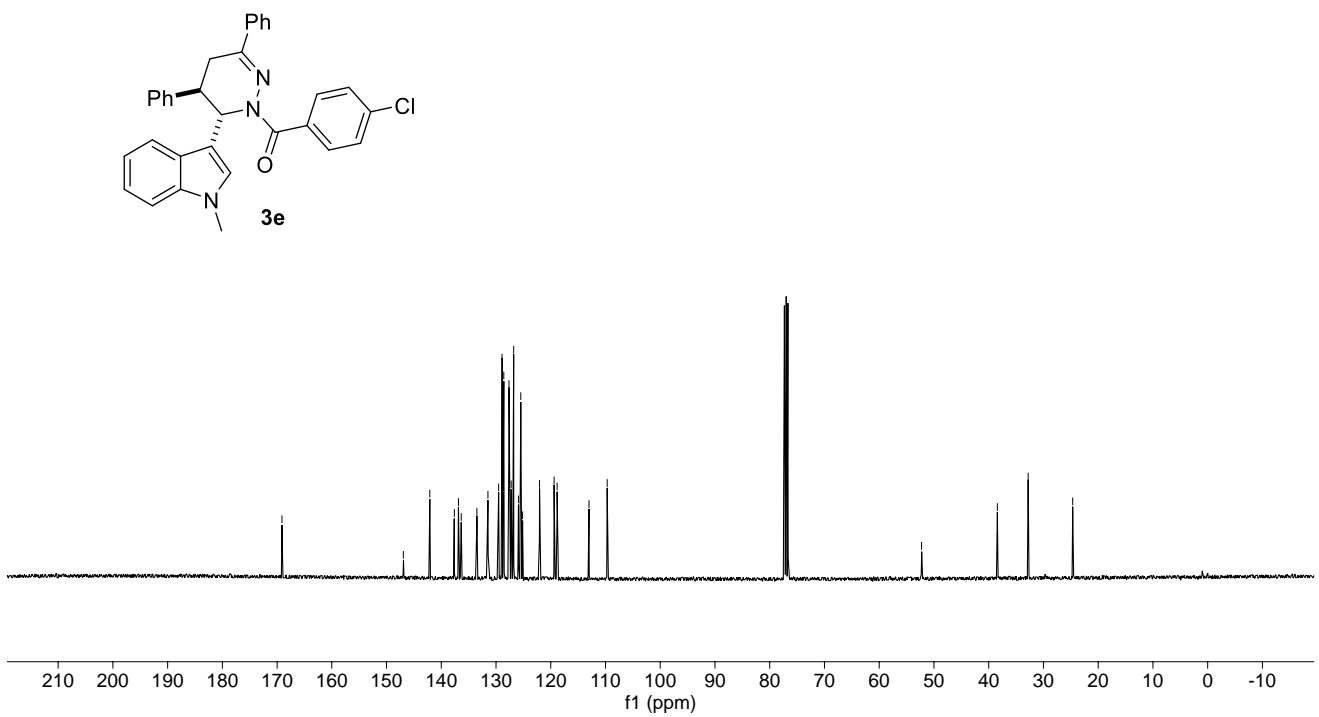



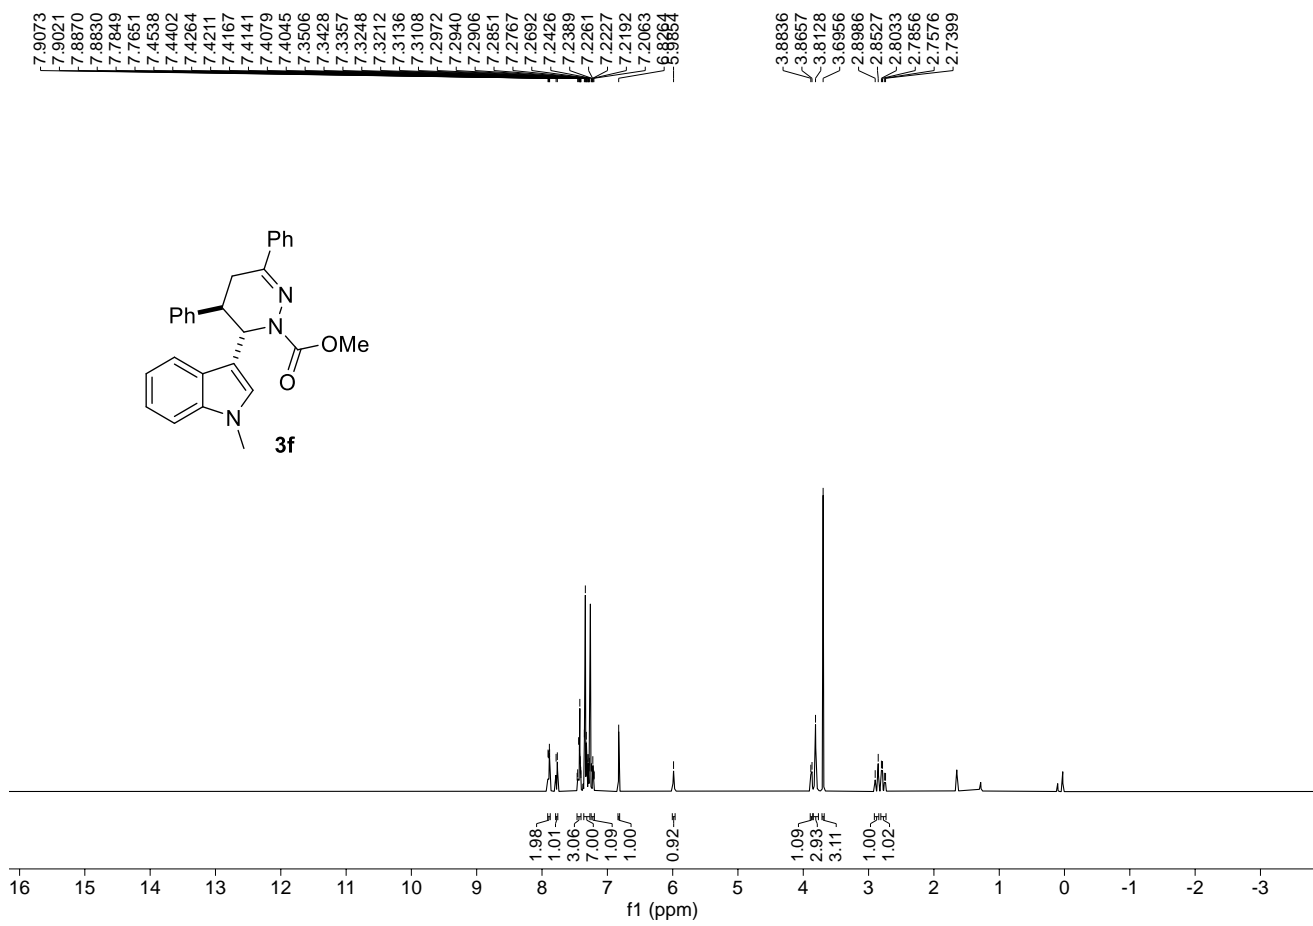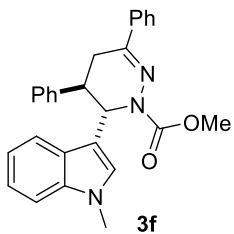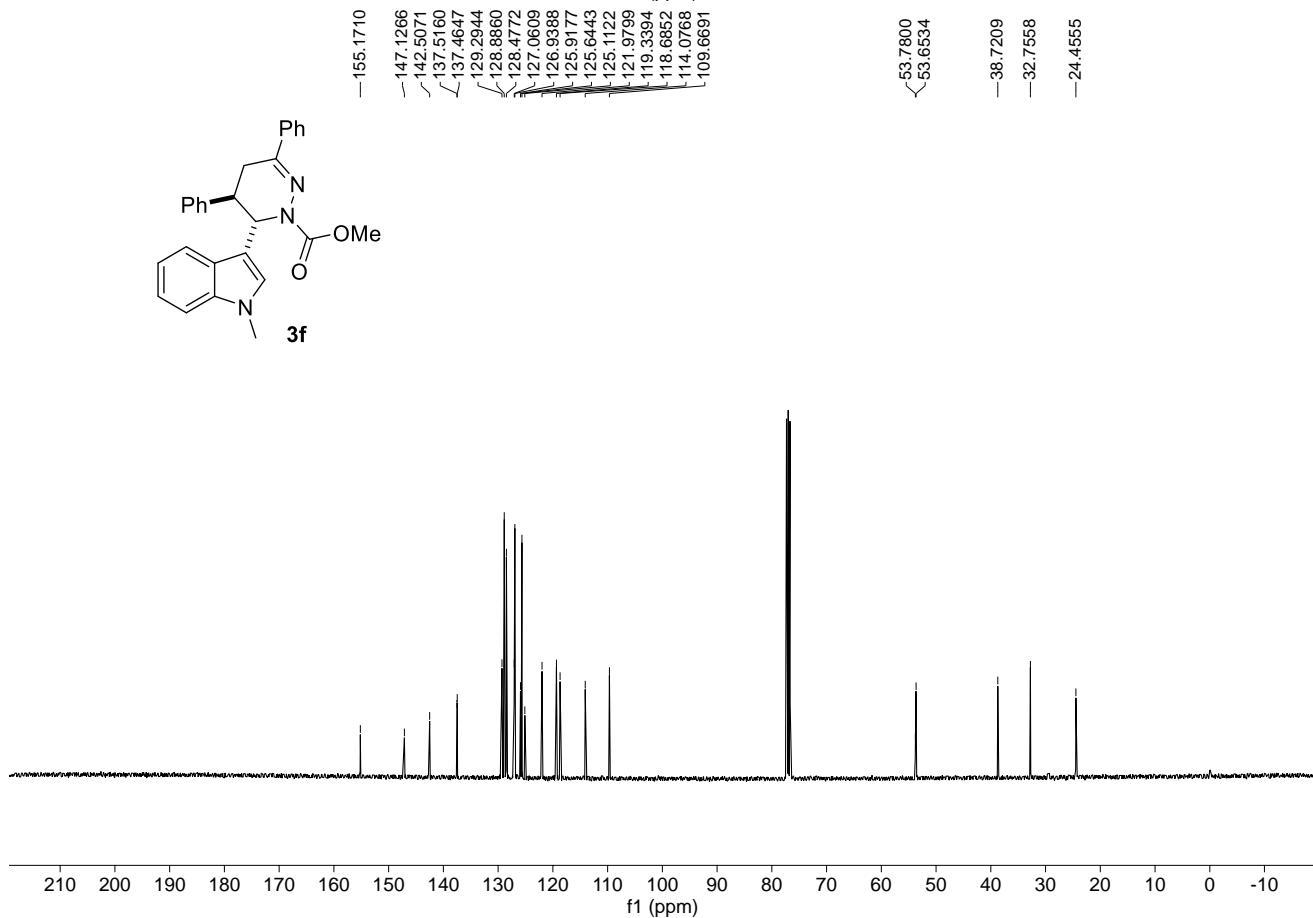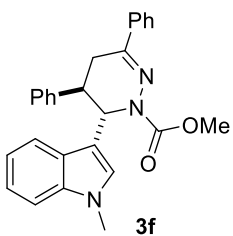

7.9421  
7.9222  
7.7825  
7.7646  
7.4501  
7.4348  
7.4163  
7.3955  
7.3666  
7.3562  
7.3419  
7.3269  
7.3101  
7.2896  
7.2817  
7.2496  
7.2298  
7.2131  
6.8649  
-5.9597

3.8690  
3.8519  
3.7018  
2.8685  
2.8230  
2.8003  
2.7834  
2.7548  
2.7407

-1.4304

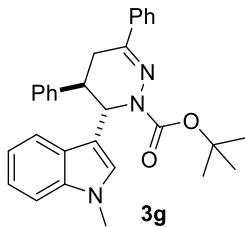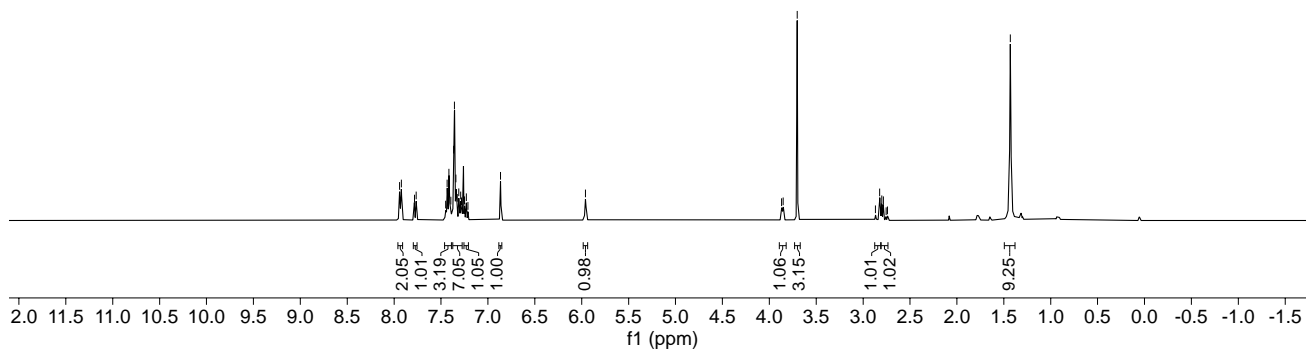

153.3963  
146.0807  
142.8502  
137.6357  
137.3920  
128.9783  
128.7261  
128.2884  
126.9290  
126.8844  
126.0441  
125.4683  
125.1898  
121.8001  
119.1904  
118.5727  
114.4370  
109.5648  
81.3030  
77.2023  
53.4254  
38.7507  
32.6658  
26.0540  
24.4095

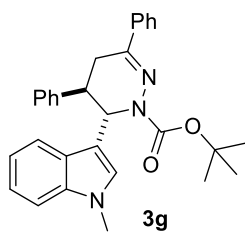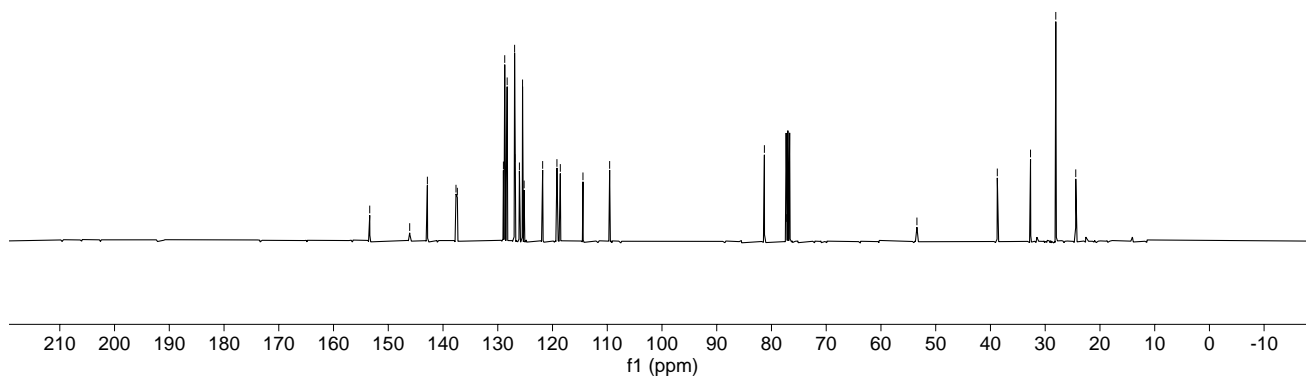

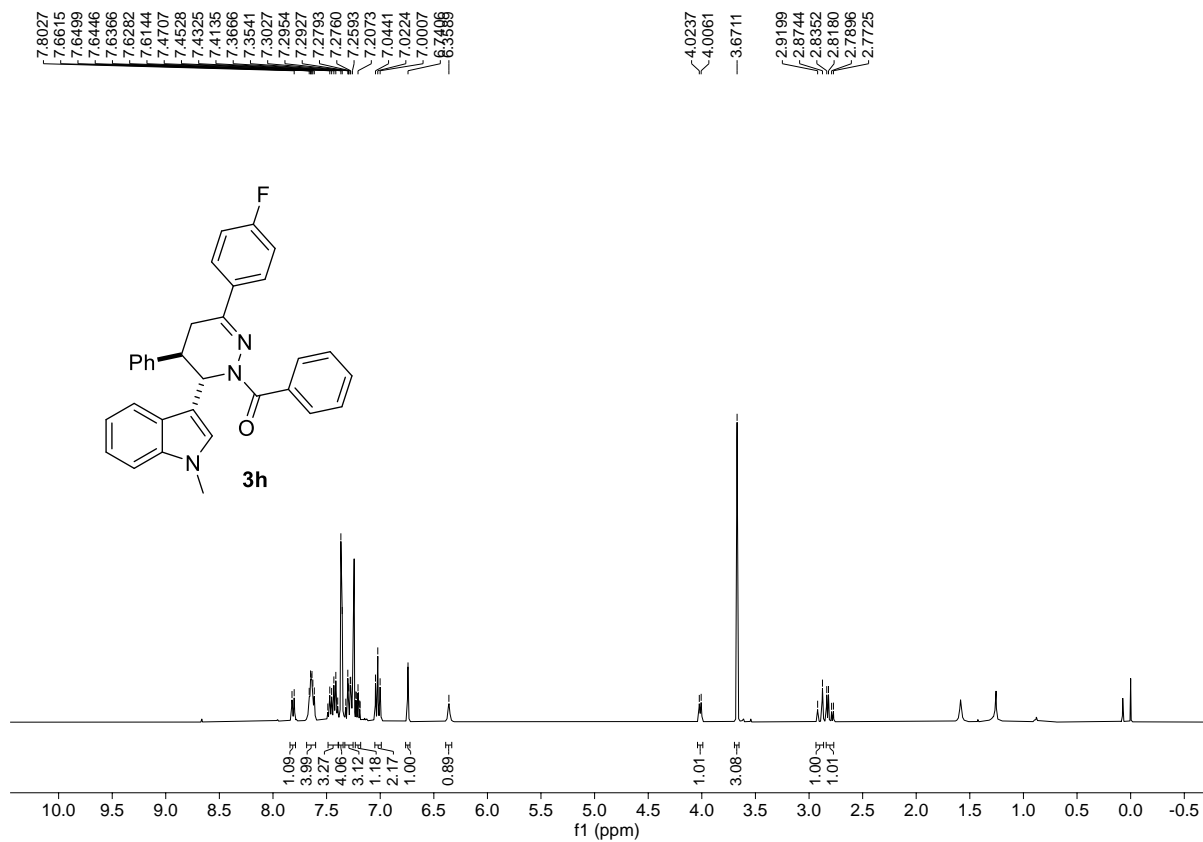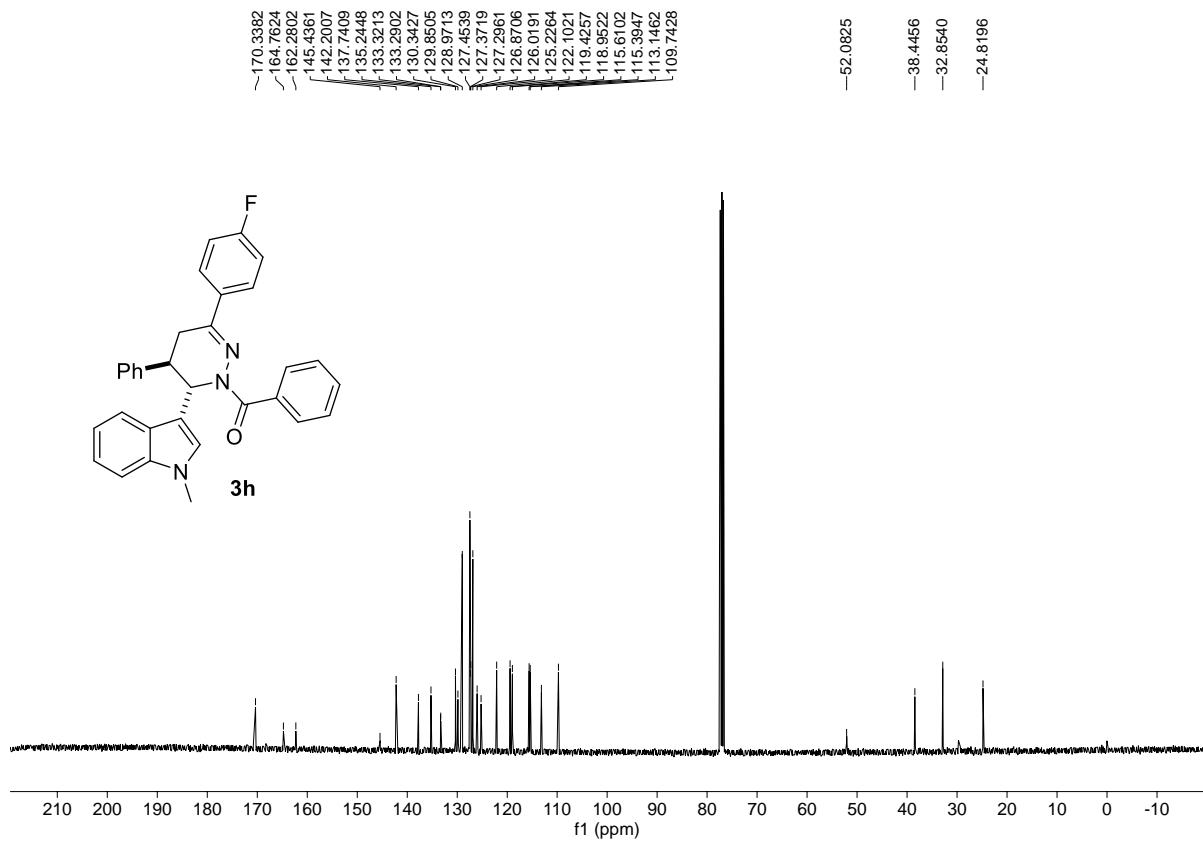

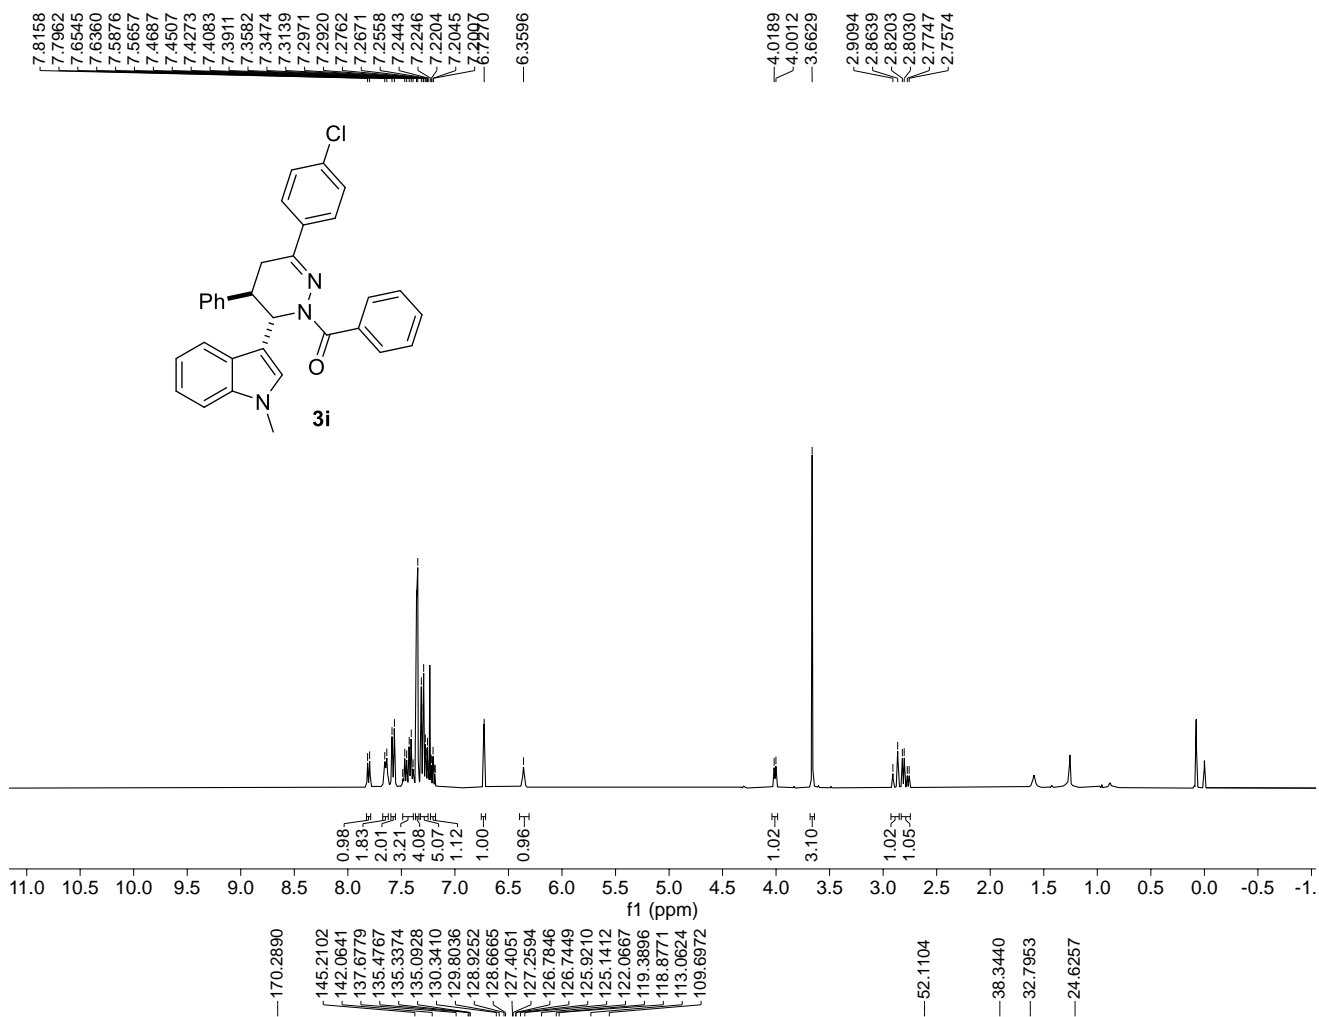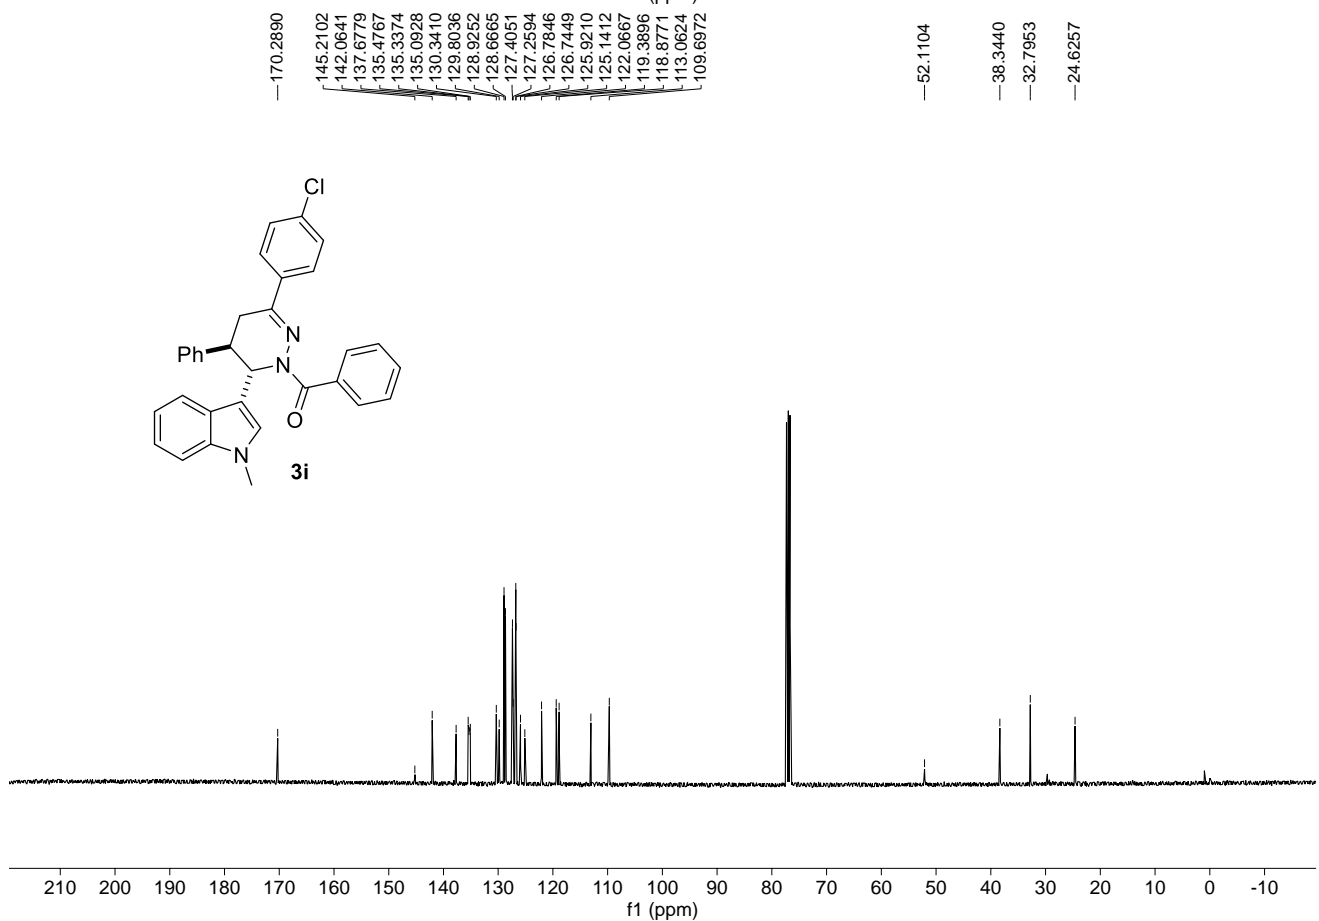

7.8179  
7.7983  
7.6499  
7.6315  
7.5282  
7.5062  
7.4789  
7.4669  
7.4308  
7.4116  
7.3943  
7.3616  
7.3497  
7.3102  
7.3003  
7.2840  
7.2763  
7.2296  
7.2256  
7.2131  
7.2095  
6.7937  
6.7297  
-6.3570

4.0230  
4.0053  
3.6789  
2.9135  
2.8679  
2.8255  
2.8083  
2.7799  
2.7626

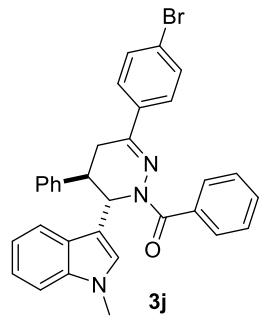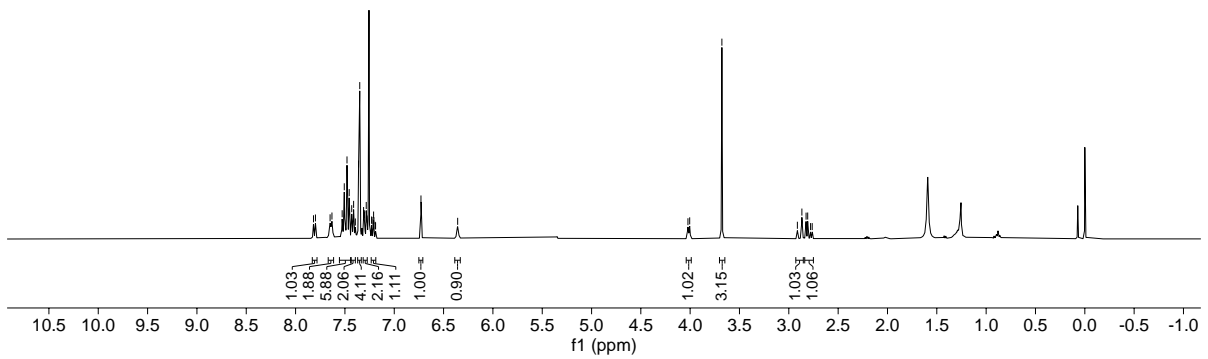

170.3565  
145.3289  
142.0851  
137.7275  
135.9668  
135.1113  
131.6792  
130.3993  
129.8512  
128.9778  
127.4539  
127.3154  
127.0493  
126.8237  
125.9628  
125.1791  
123.7279  
122.1203  
119.4416  
118.9218  
113.0935  
109.7431  
52.1648  
38.3700  
32.8548  
24.6074

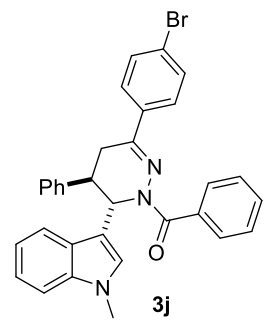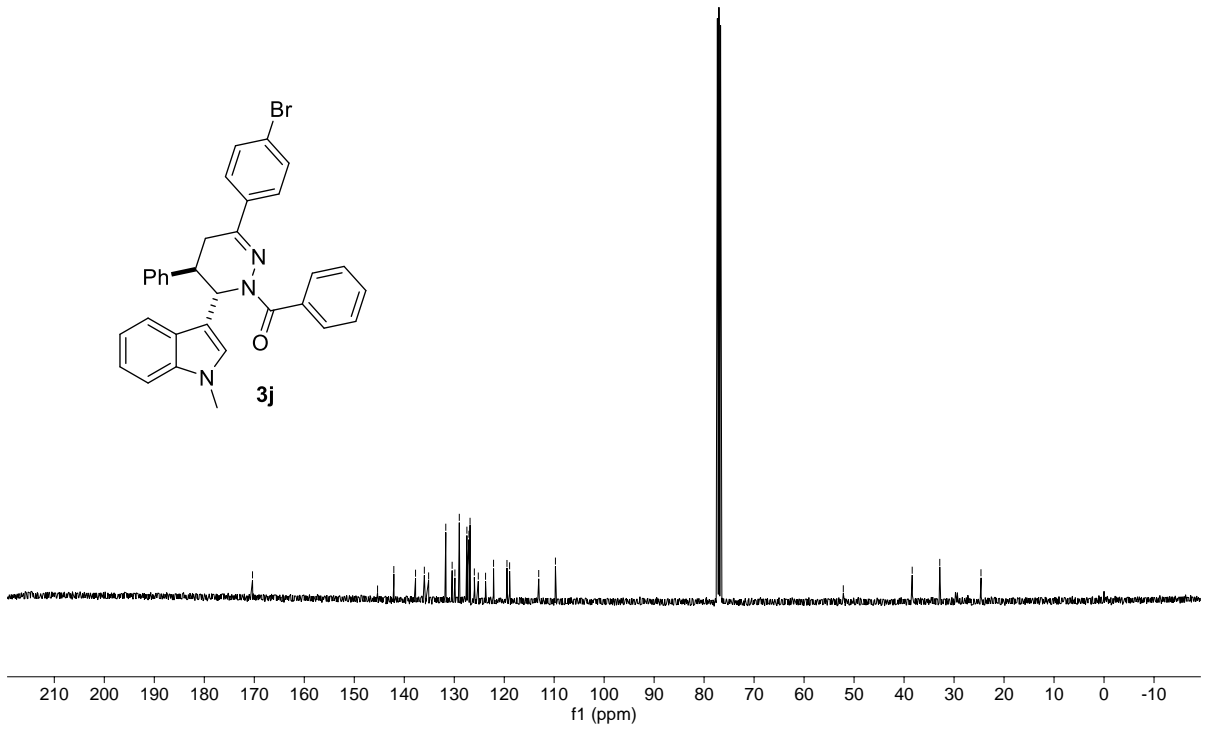

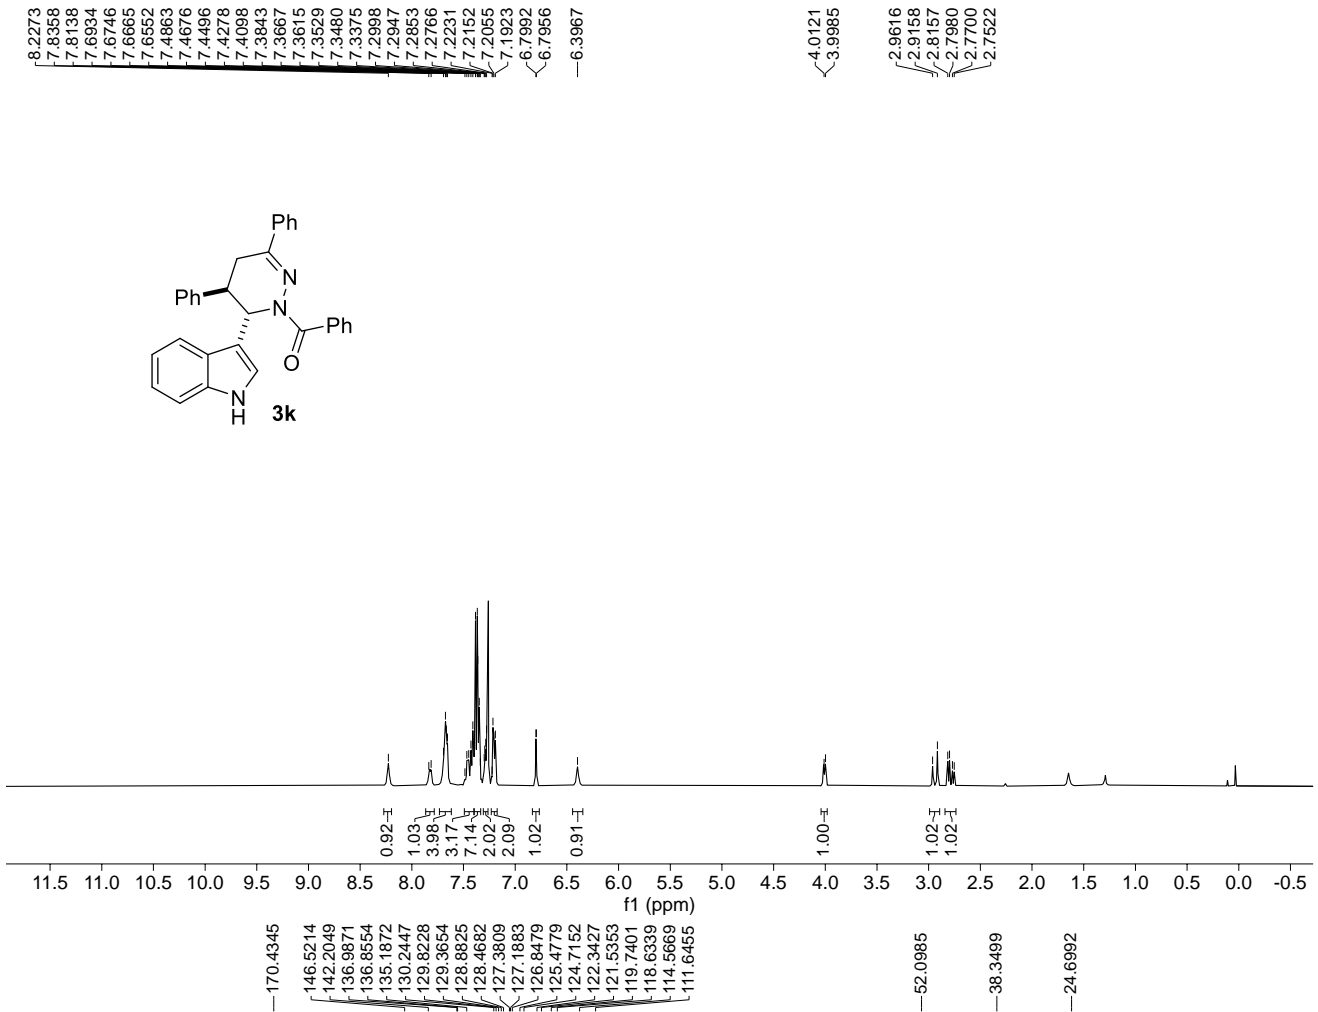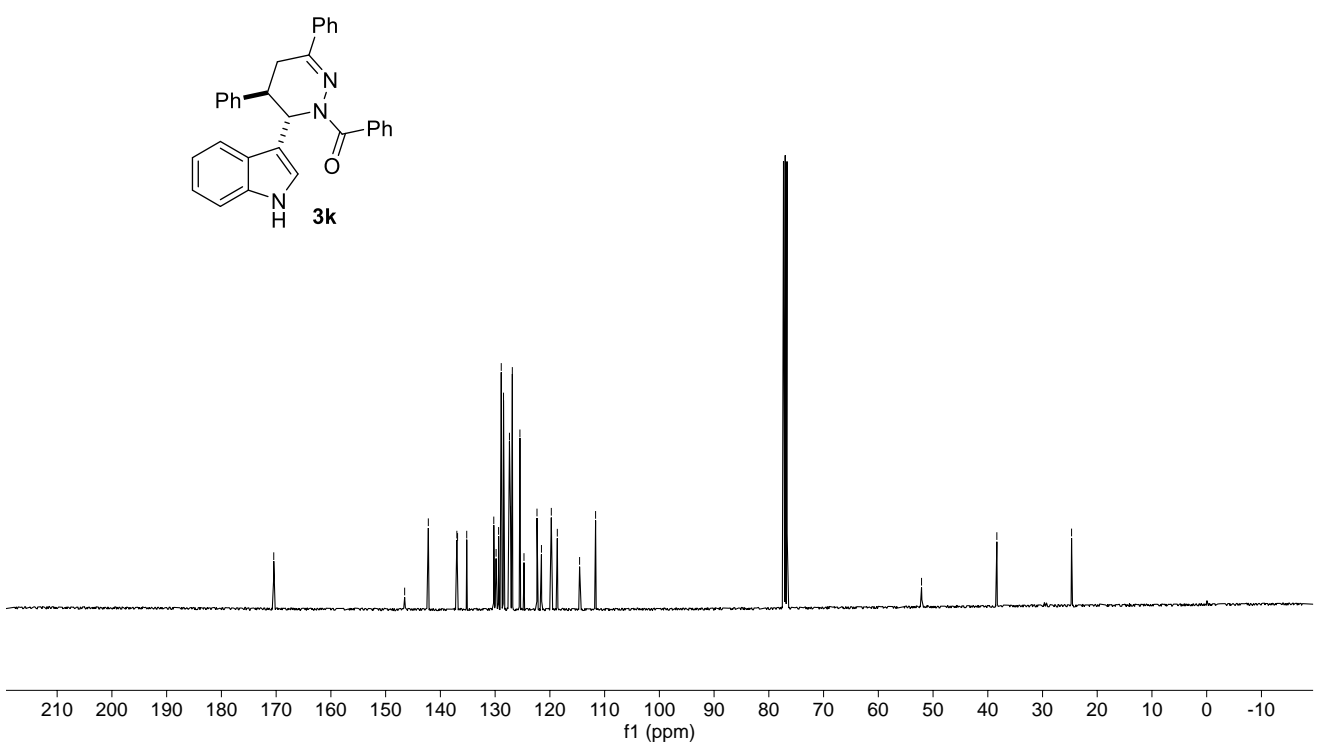

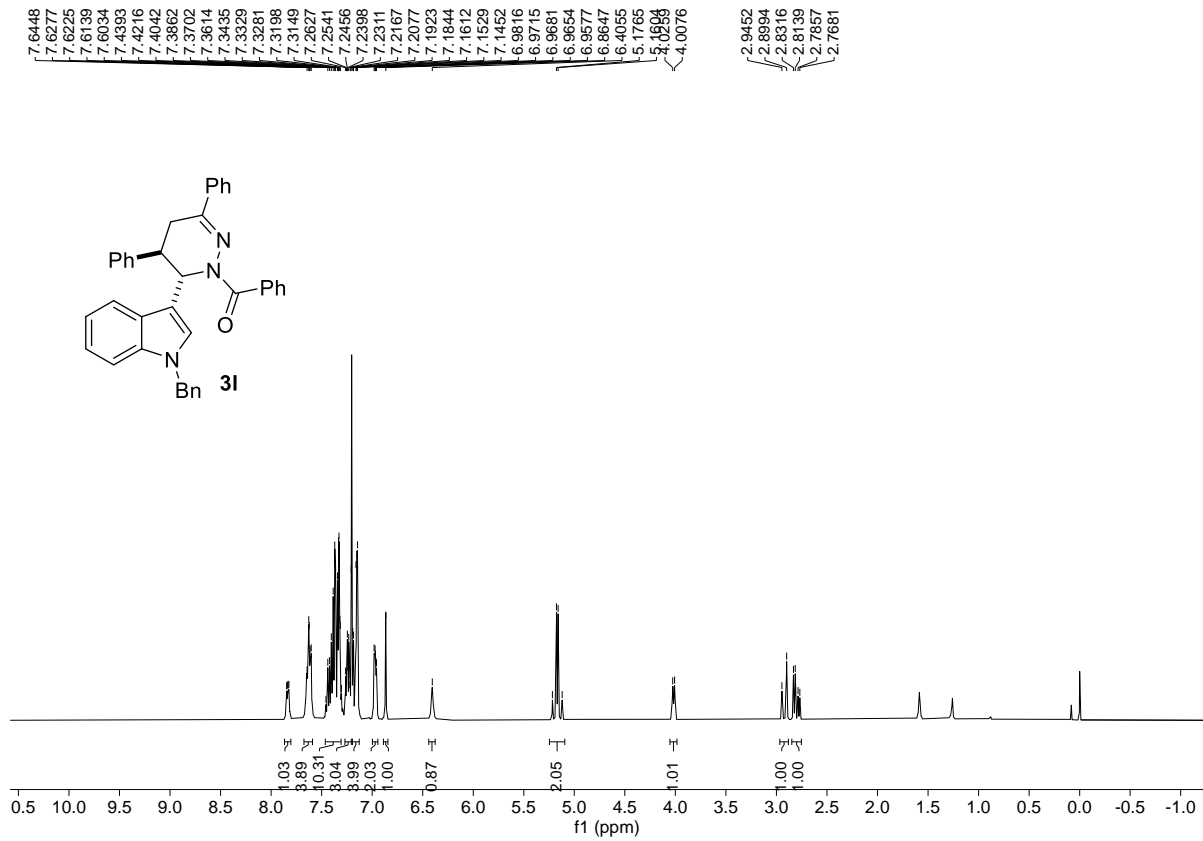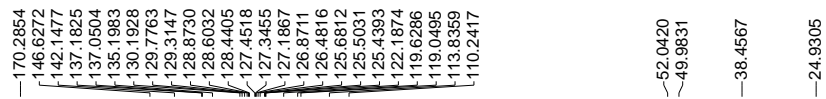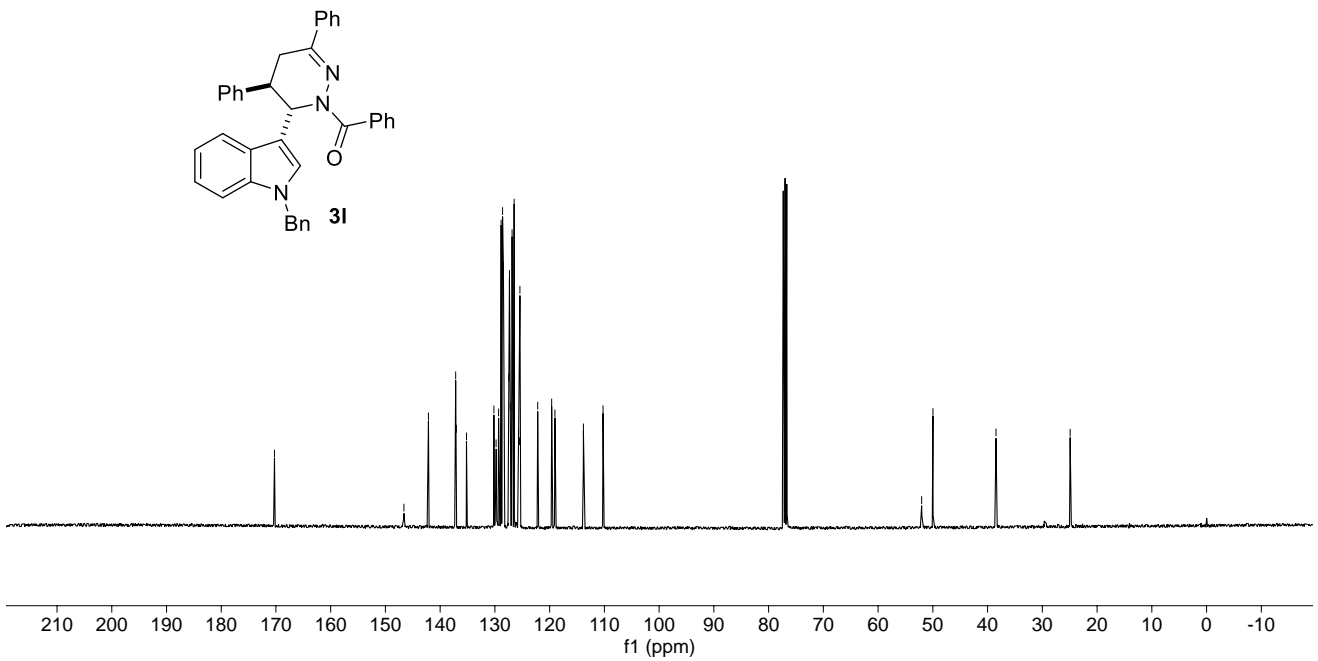

7.8310  
7.8115  
7.7005  
7.6815  
7.6702  
7.6652  
7.6558  
7.6466  
7.4608  
7.4432  
7.4300  
7.4111  
7.3439  
7.3375  
7.3281  
7.2809  
7.2652  
7.2450  
7.2329  
7.2247  
7.2145  
7.1338  
7.1143  
7.0653  
7.0466  
6.3446

3.9802  
3.9621  
3.6365  
2.9311  
2.8853  
2.8405  
2.8231  
2.7949  
2.7774  
2.3512

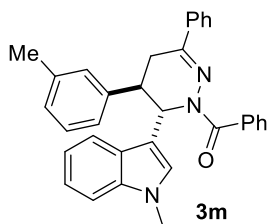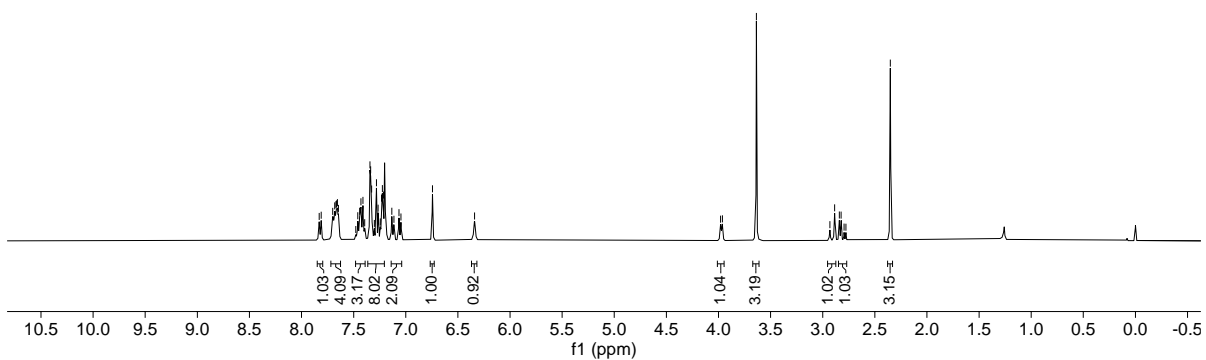

170.2894  
146.4700  
142.3044  
138.4040  
137.6499  
137.1249  
135.2688  
130.2187  
129.8759  
129.2773  
128.7093  
128.4470  
127.9431  
127.8069  
127.3497  
125.9980  
125.4820  
125.2054  
123.5254  
121.9569  
119.2852  
118.9242  
113.1778  
109.6317

52.0549  
38.3984  
32.7430  
24.8457  
21.5586

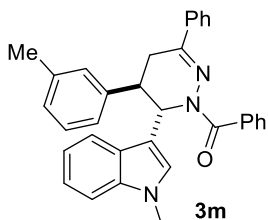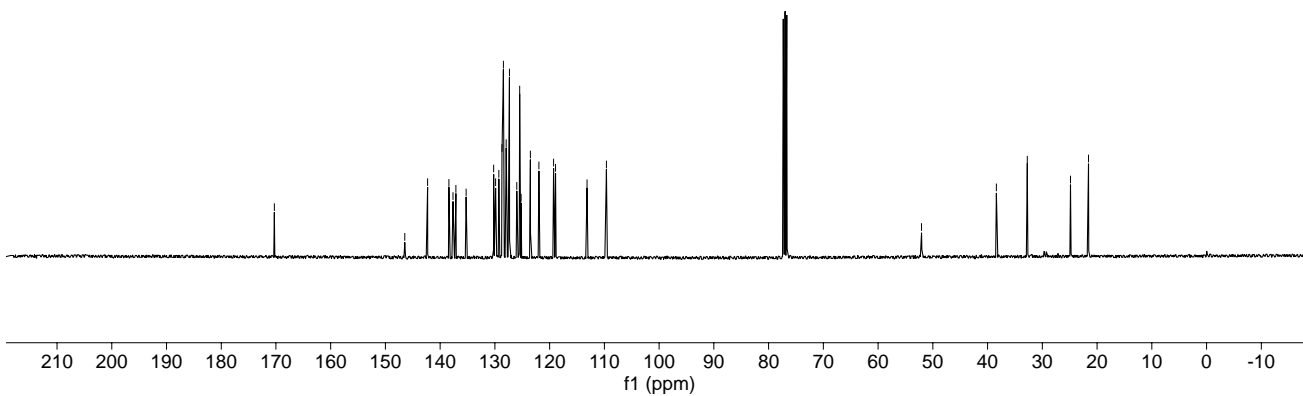



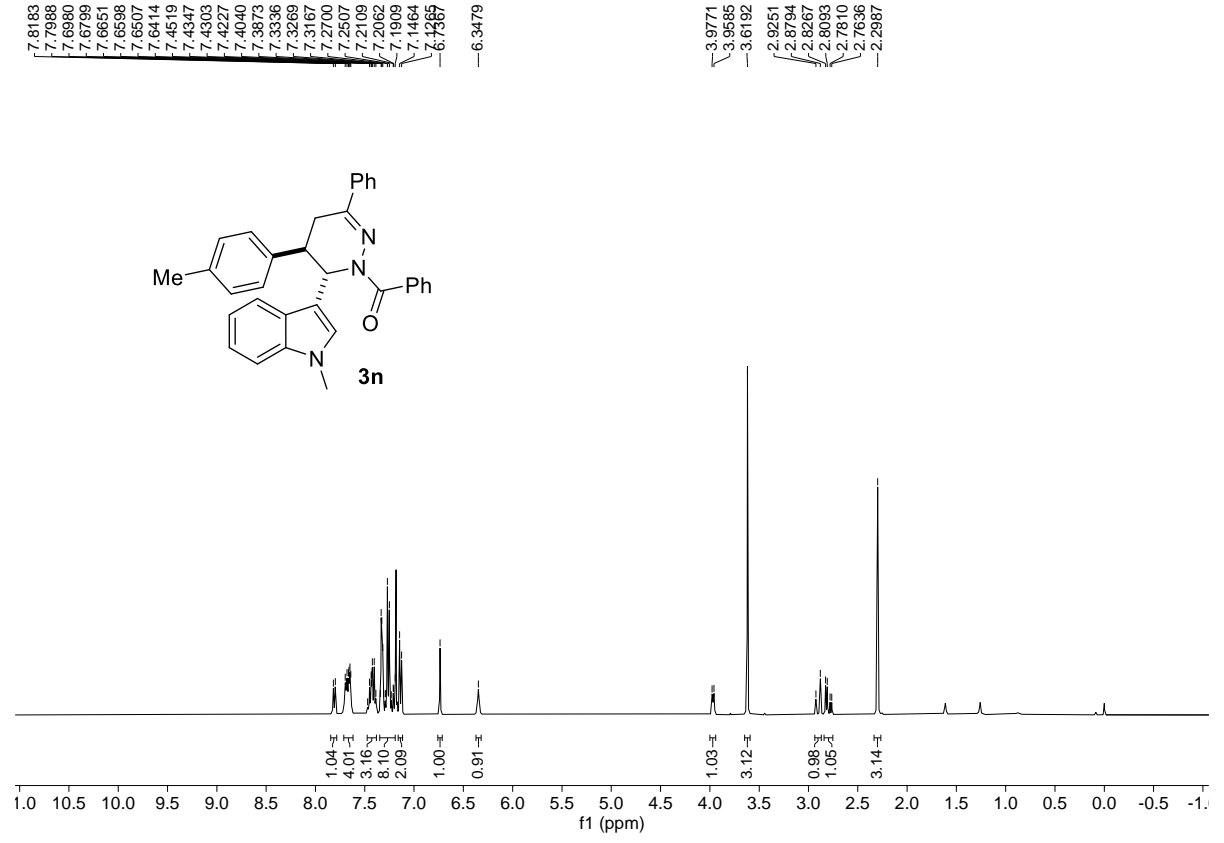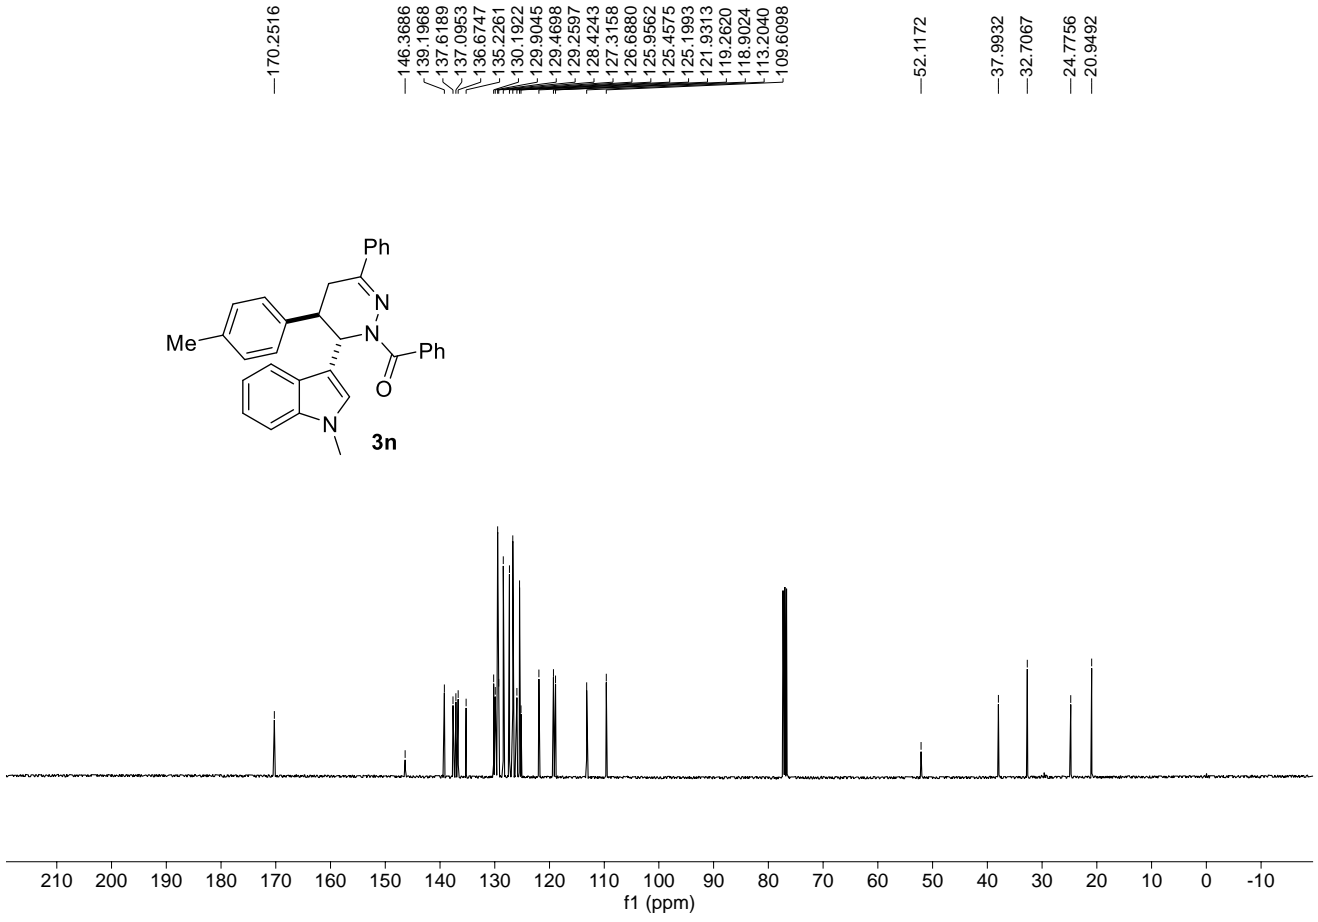

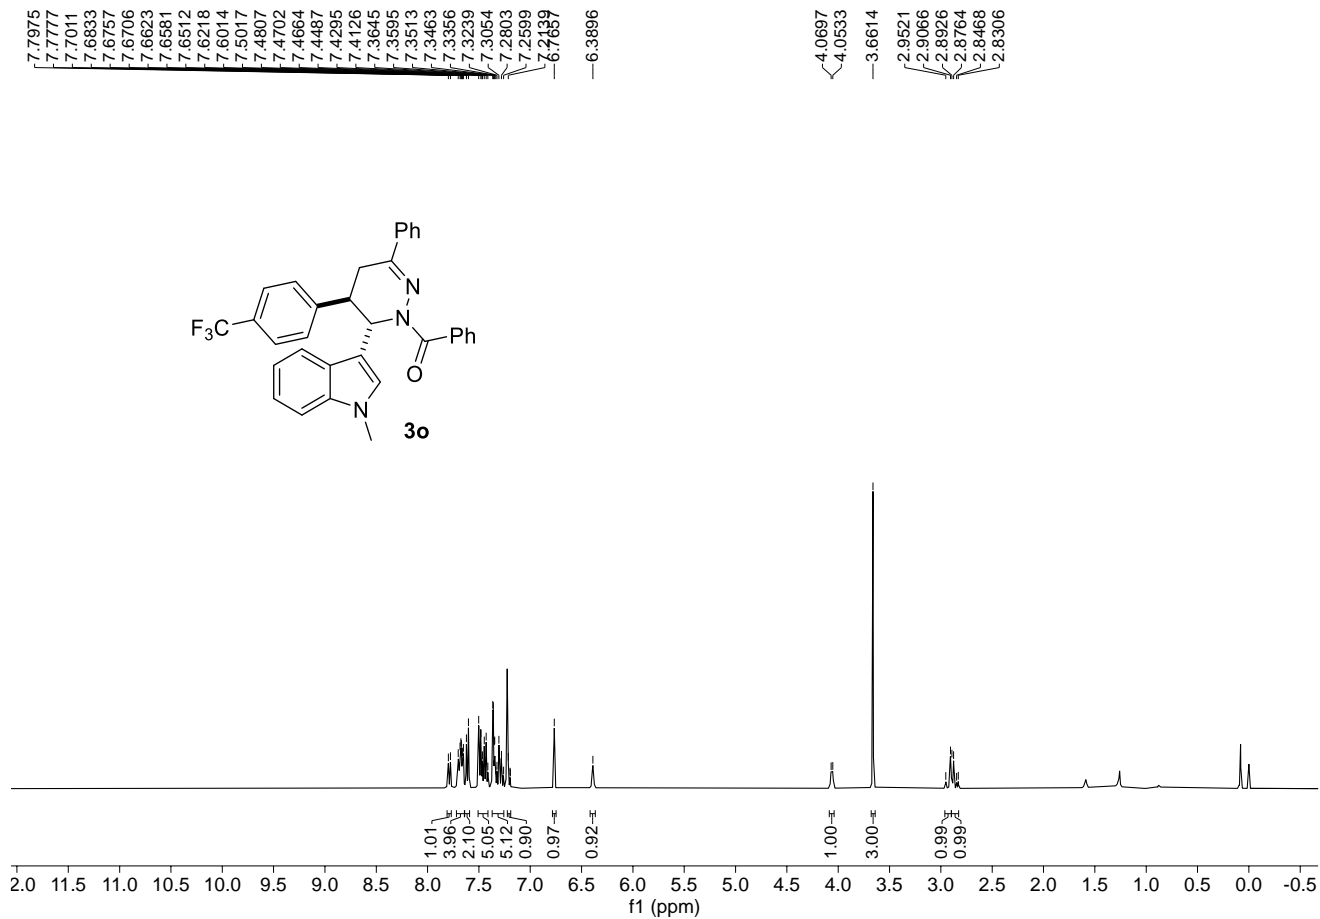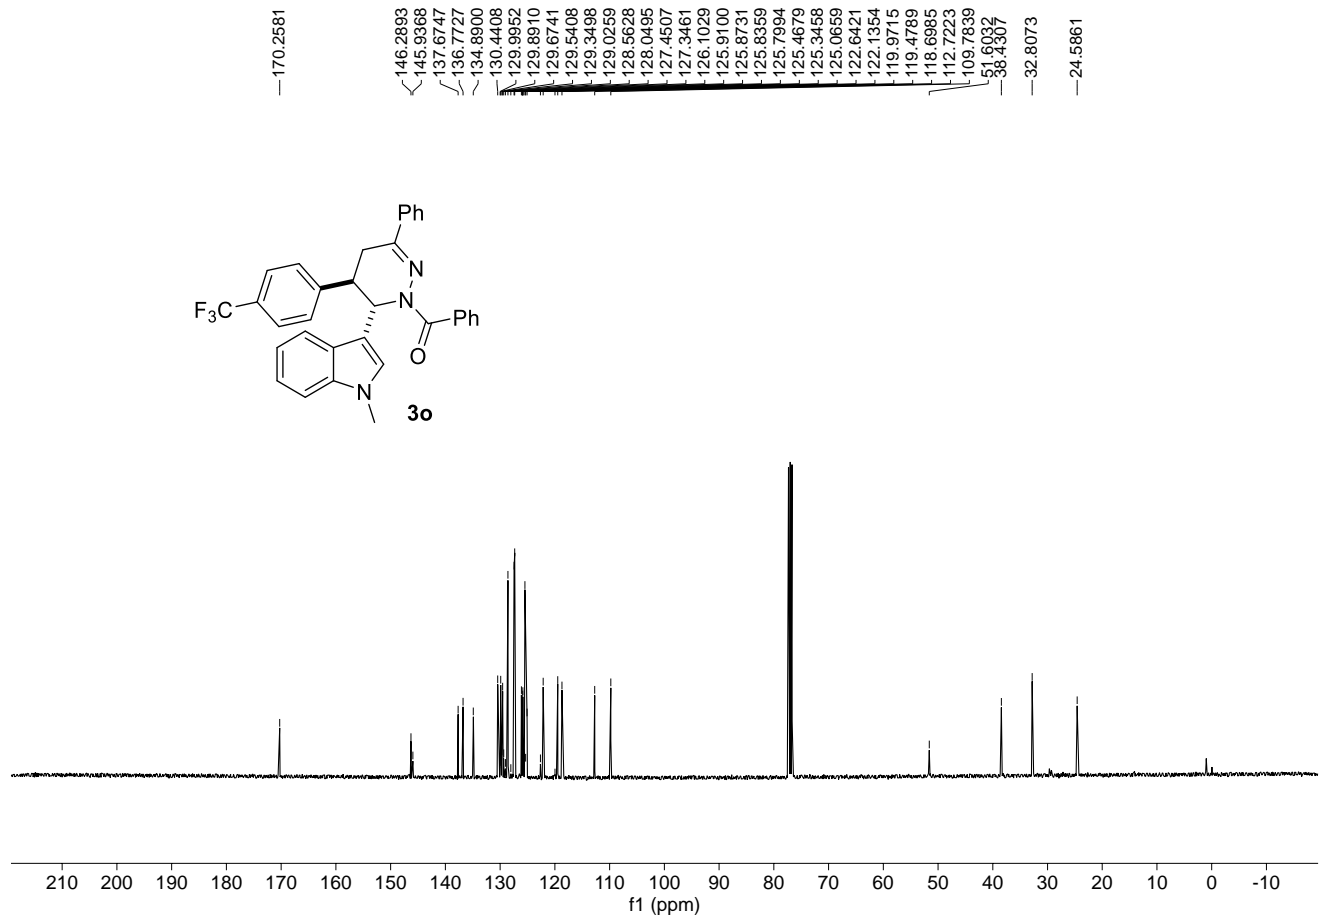

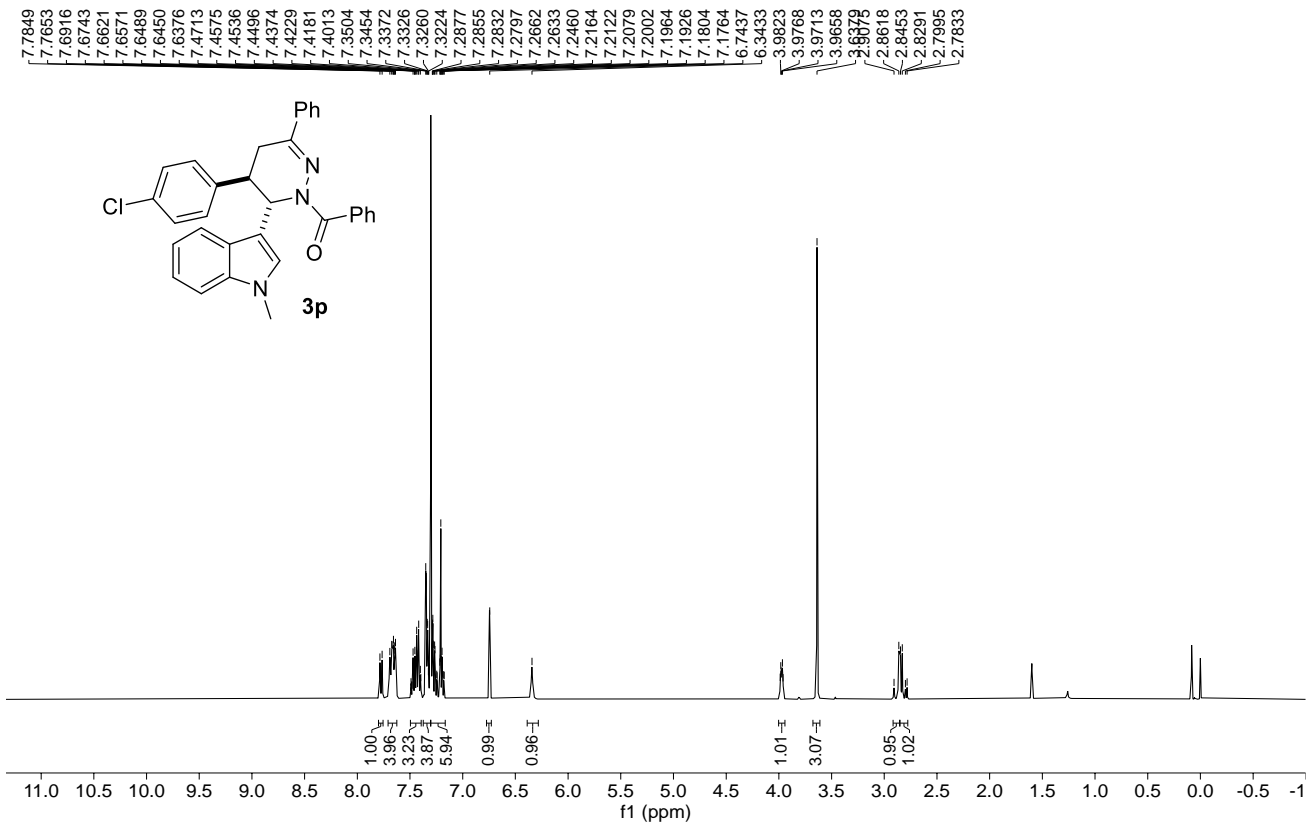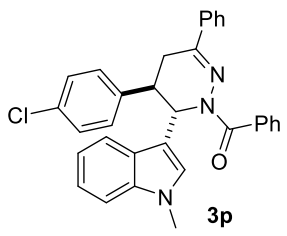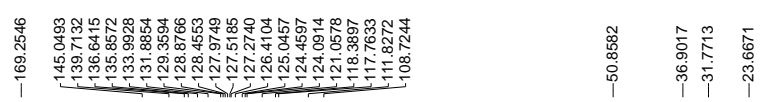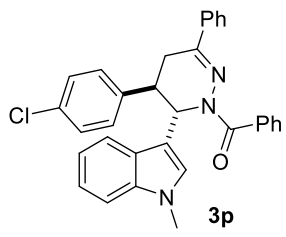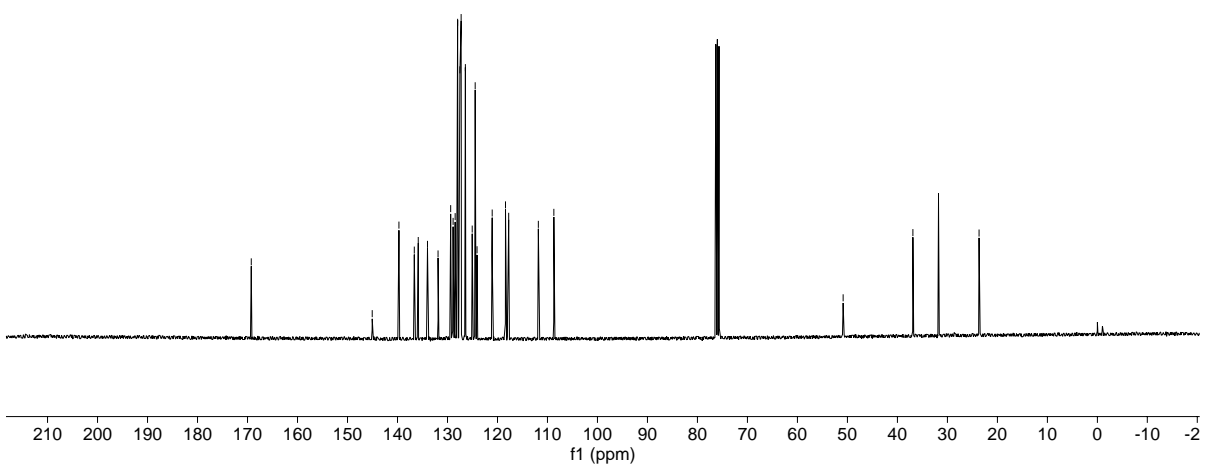

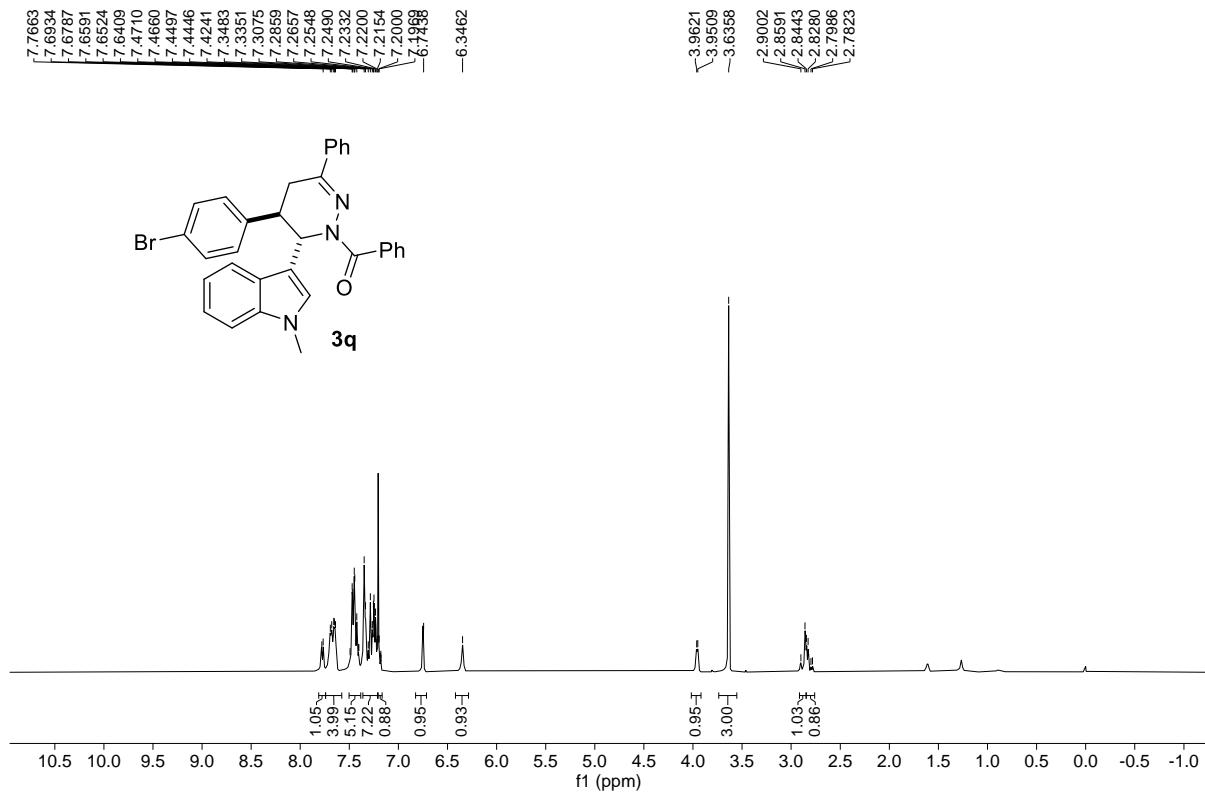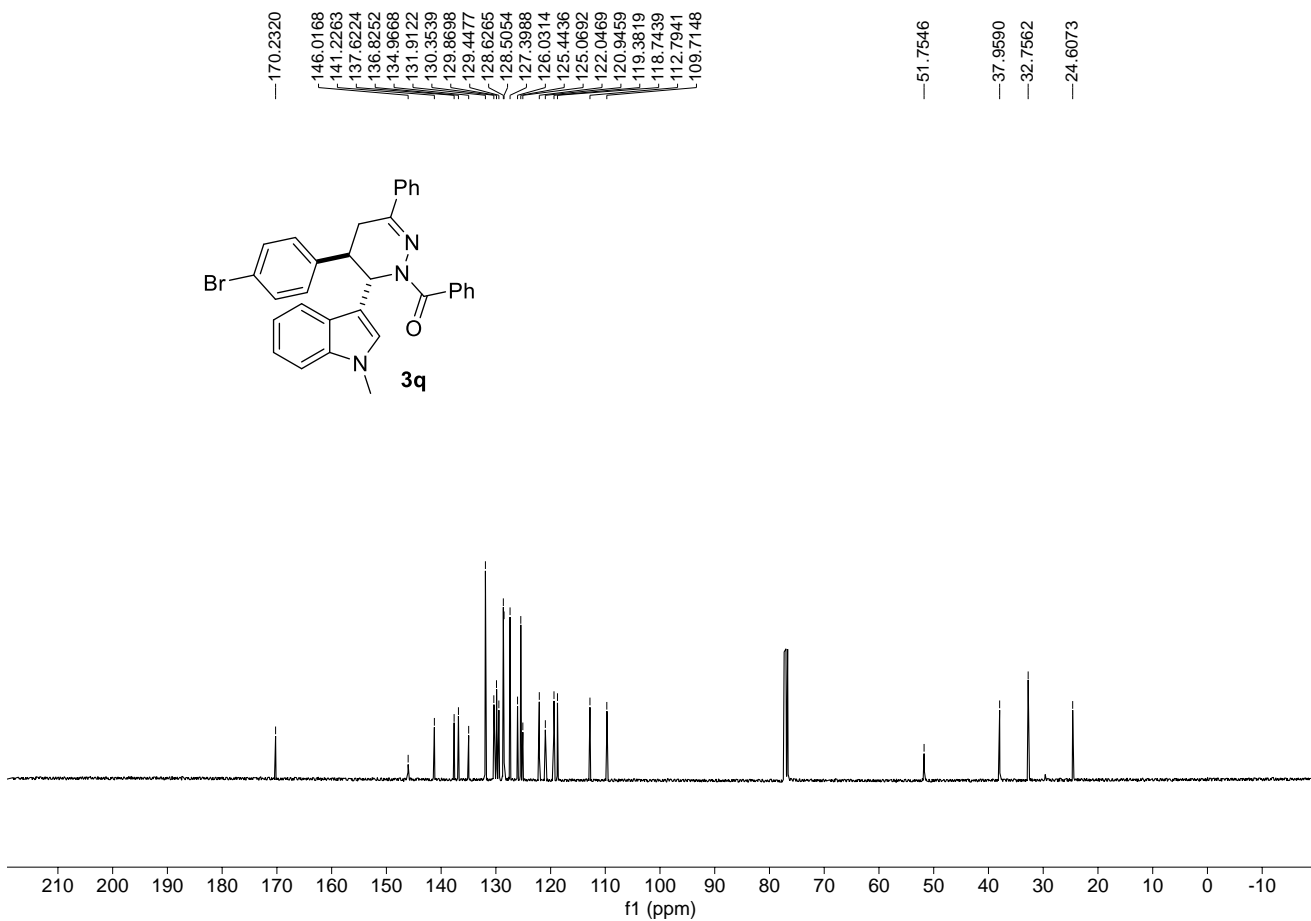

7.8019  
7.7821  
7.6403  
7.6169  
7.6074  
7.5977  
7.3996  
7.3819  
7.3653  
7.3470  
7.2900  
7.2845  
7.2765  
7.2724  
7.2218  
7.2122  
7.1928  
7.1588  
7.1377  
7.1338  
7.1176  
7.1008  
7.0861  
7.0765  
6.9888  
6.9888  
-6.1704  
4.1074  
4.0906  
-3.5895  
2.8676  
2.8508  
2.8215  
2.8048  
2.7910  
2.7452  
2.6270

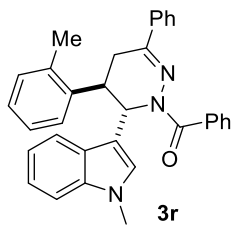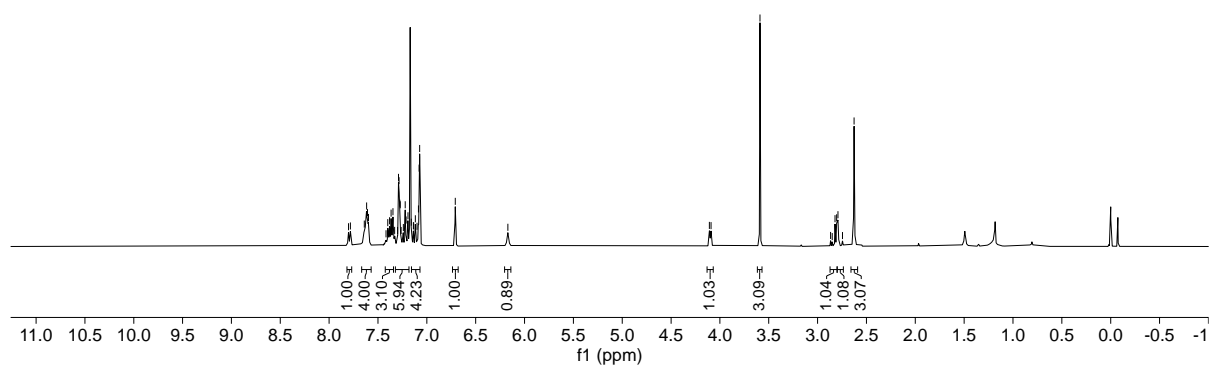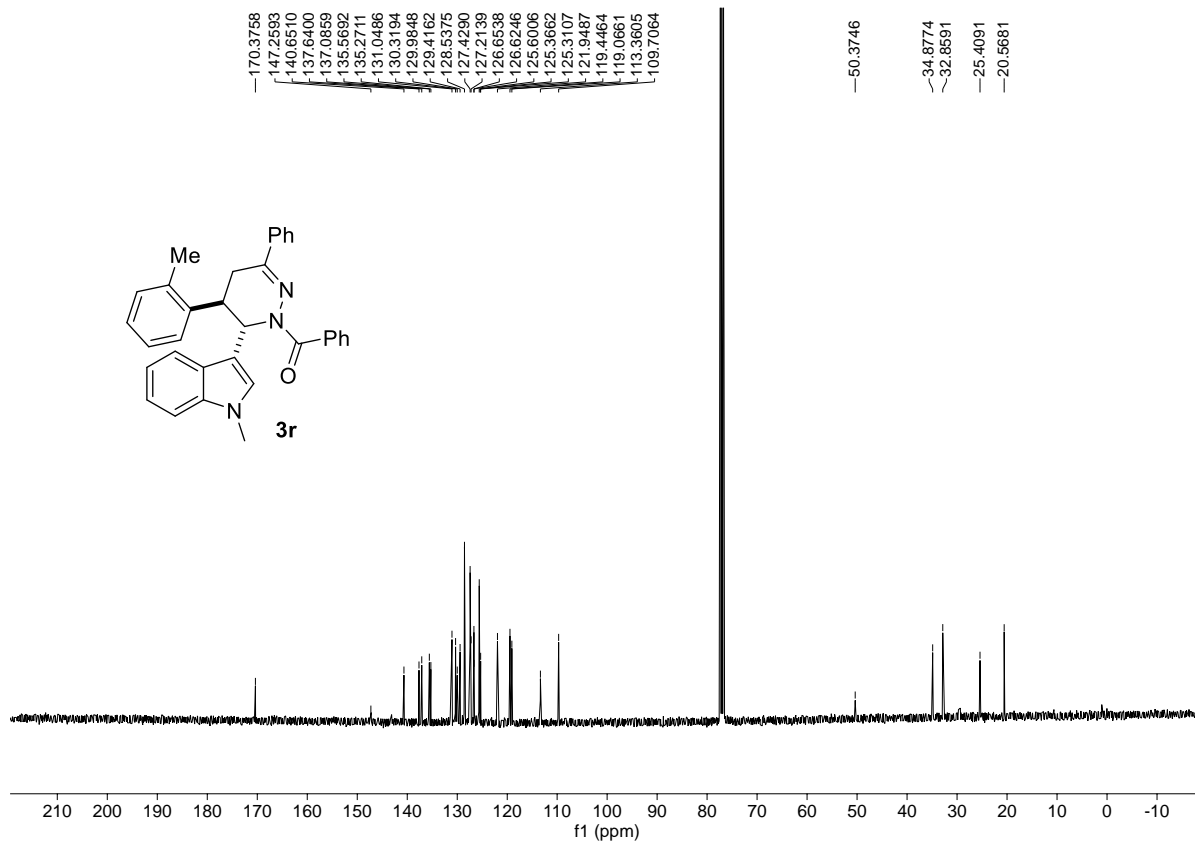

7.8257  
7.7455  
7.7291  
7.7131  
7.6029  
7.5935  
7.5842  
7.4364  
7.4300  
7.4193  
7.4109  
7.3916  
7.3162  
7.3094  
7.3004  
7.2049  
7.1499  
7.1375  
7.1182  
7.1019  
-6.6857

-6.0655

-3.6222

2.7616  
2.7133  
2.4065  
2.3905  
2.3614  
2.3487

1.2724  
1.2554

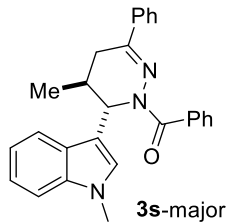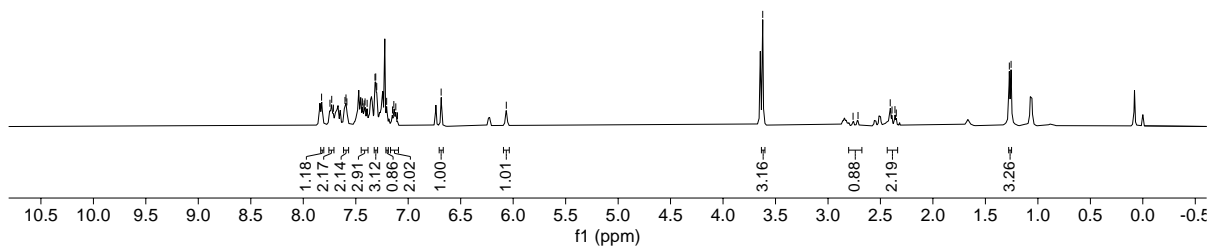

170.5537  
146.8294  
137.6441  
136.4652  
135.4227  
130.0140  
129.9229  
129.0692  
128.5334  
127.3522  
126.6179  
125.4536  
125.3708  
121.7894  
119.4087  
119.0286  
113.5570  
109.4835

-50.0488

-32.6882  
-27.8786  
-26.6107  
-18.9433

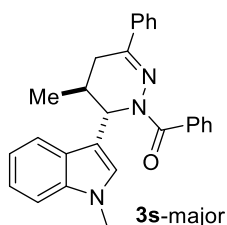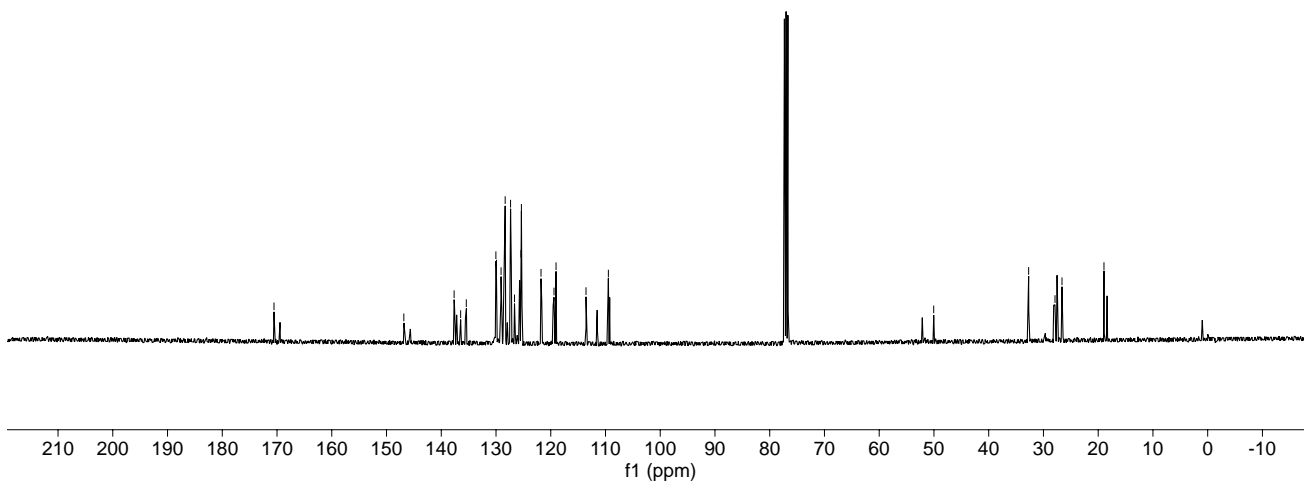

7.7612  
7.6161  
7.6080  
7.5988  
7.5890  
7.5881  
7.4124  
7.3910  
7.3731  
7.2789  
7.2711  
7.2637  
7.1921  
7.1830  
7.1721  
7.1630  
7.1253  
7.1044  
-6.6572  
-6.1443

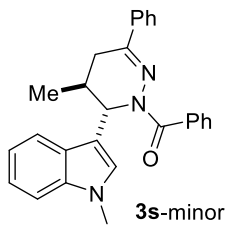

-3.5650  
2.7631  
2.7206  
2.4787  
2.4635  
2.4344  
2.4191  
0.9927  
0.9767

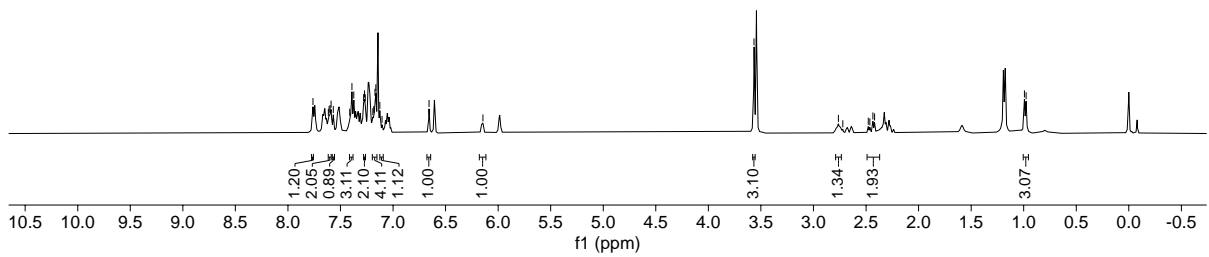

169.4532  
145.6395  
137.5937  
137.1884  
135.5848  
130.1929  
129.9448  
129.1061  
128.4359  
127.9284  
127.2070  
125.6913  
125.2592  
121.6408  
119.5638  
119.0671  
111.5208  
109.2296  
52.1185  
32.7339  
28.1274  
27.5103  
18.3715

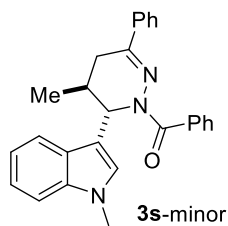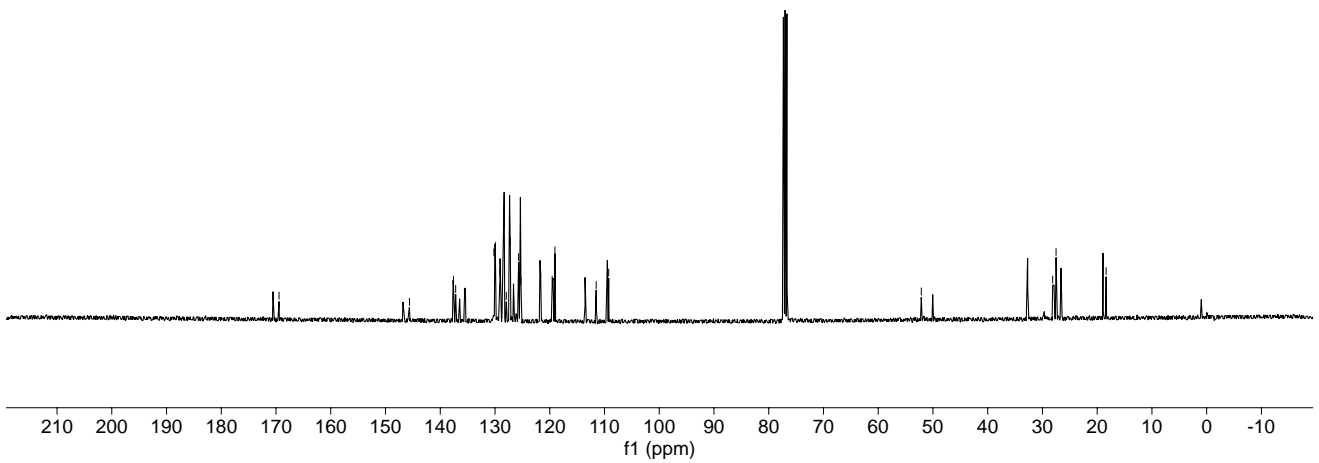

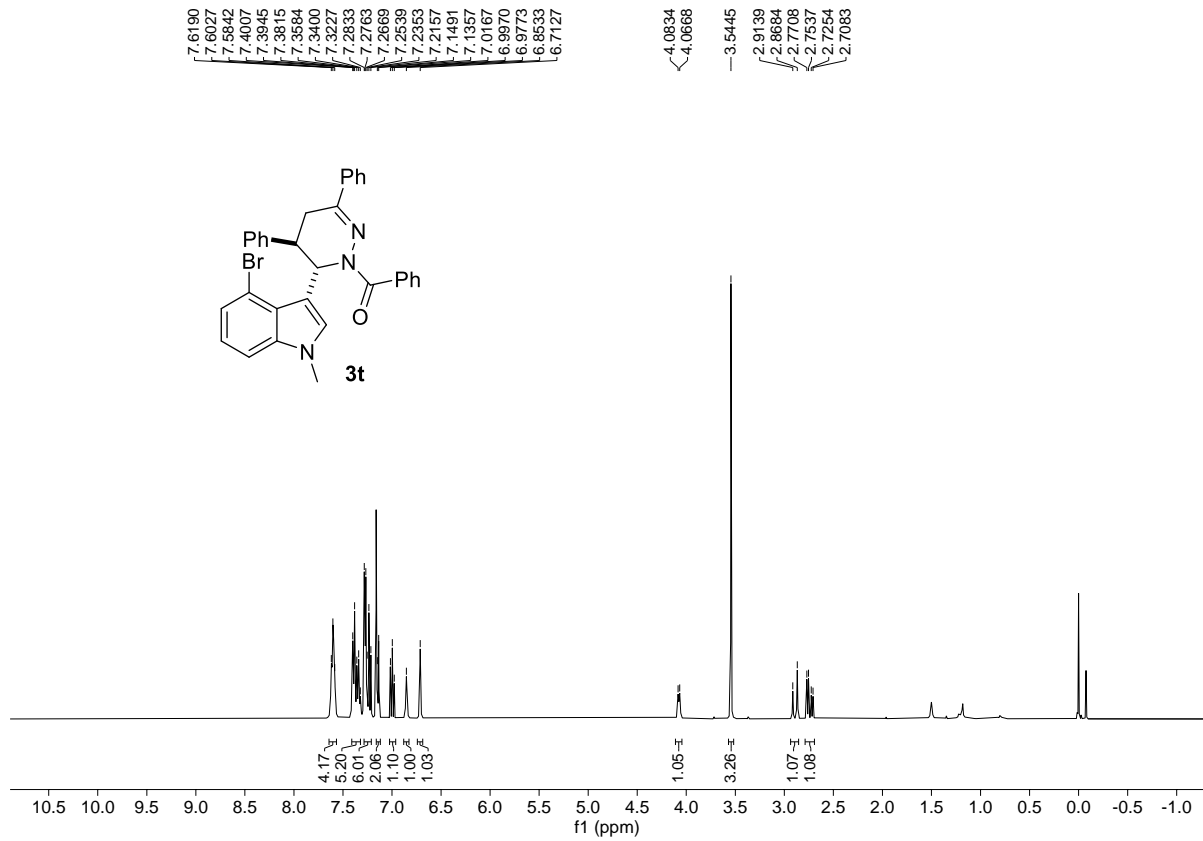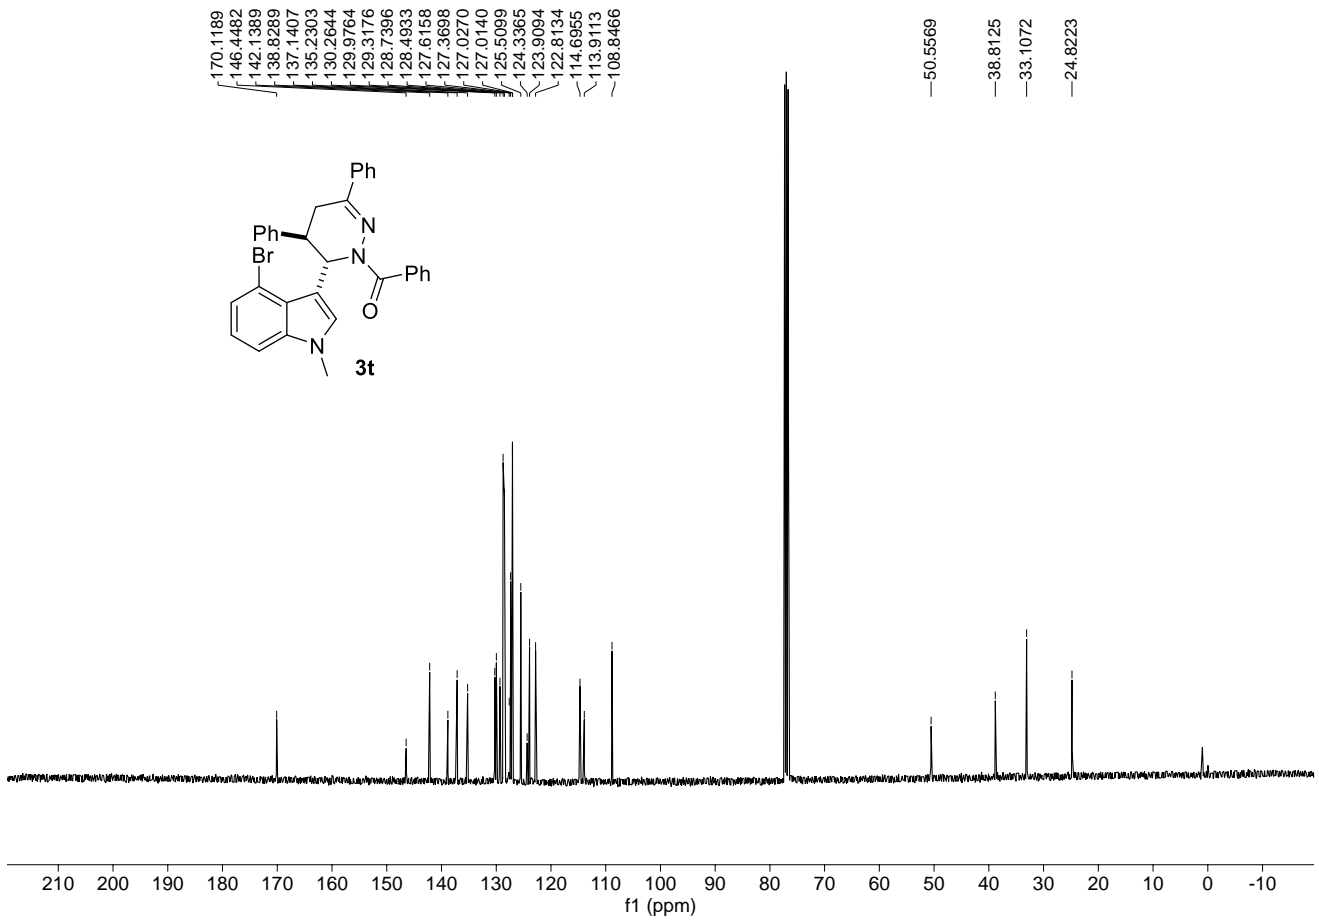



7.7147  
7.6935  
7.6788  
7.6737  
7.6647  
7.6604  
7.6540  
7.4713  
7.4534  
7.4327  
7.4177  
7.4134  
7.3594  
7.3551  
7.3521  
7.3466  
7.2978  
7.2933  
7.2529  
7.2313  
7.1771  
7.1565  
7.1368  
6.3132

3.9502  
3.9315  
3.6224  
2.9827  
2.9369  
2.8374  
2.8196  
2.7737

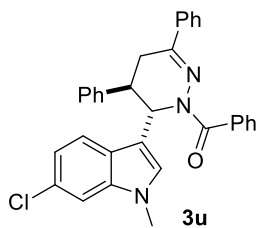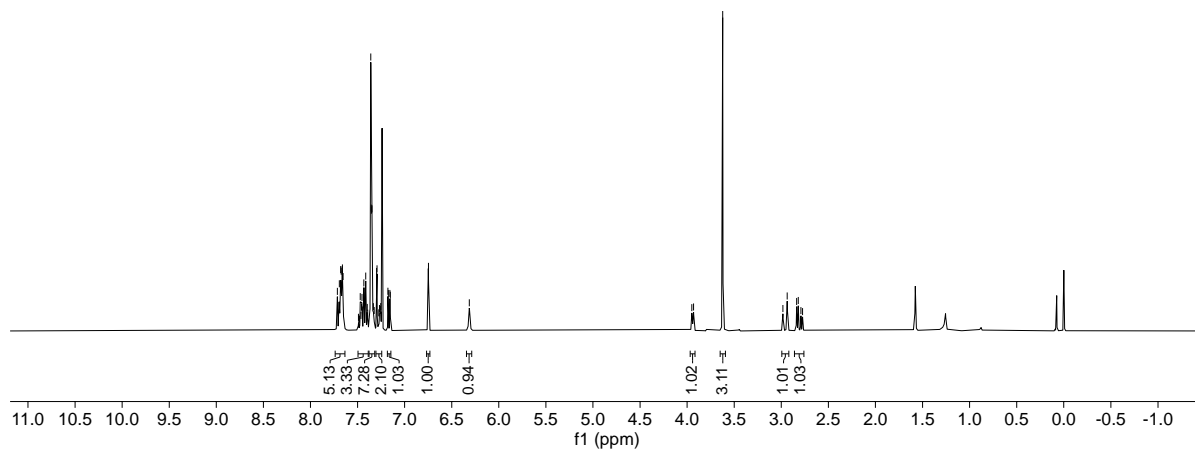

170.3818  
146.4229  
142.0624  
138.0990  
136.9990  
135.0671  
130.4283  
129.9808  
129.4958  
128.9863  
128.5723  
128.2560  
127.4679  
127.3441  
126.8772  
126.8267  
125.5575  
123.8383  
120.1417  
119.8301  
113.6332  
109.7989  
51.9234  
38.6271  
32.9502  
24.7385

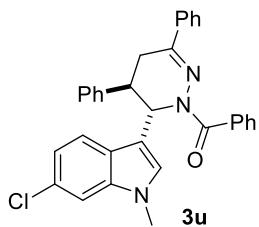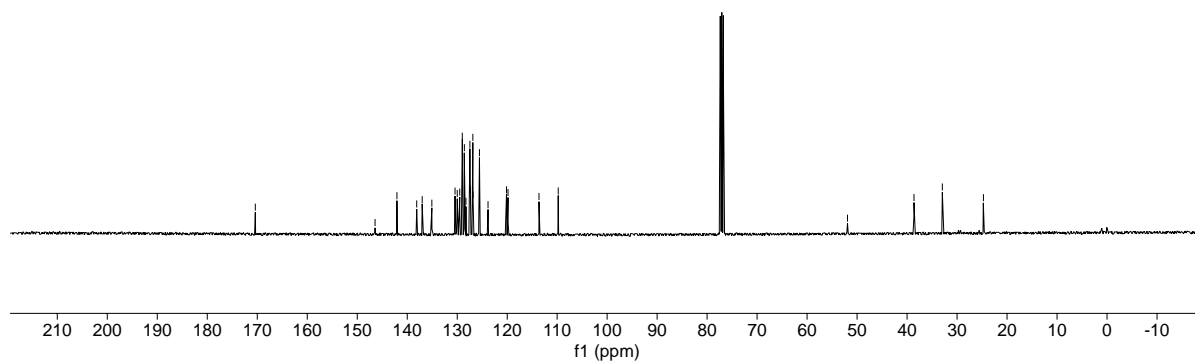

7.9189  
7.6792  
7.6742  
7.6612  
7.6551  
7.4874  
7.4689  
7.4510  
7.4297  
7.4107  
7.3932  
7.3849  
7.3702  
7.3643  
7.3540  
7.3411  
7.3317  
7.3270  
7.2784  
7.2724  
7.2640  
7.2567  
7.2487  
7.1712  
-6.7439  
-6.2815

3.9509  
3.9324  
3.6285  
2.9937  
2.9478  
2.8360  
2.8181  
2.7902  
2.7724

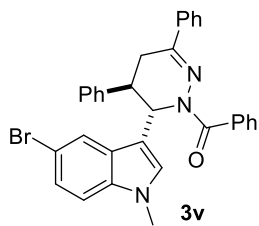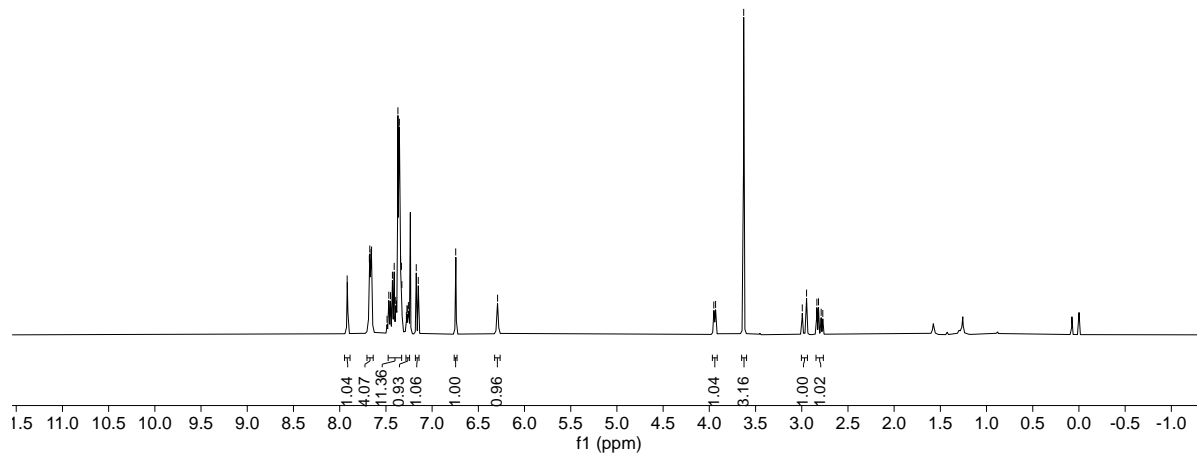

170.3443  
146.4152  
141.9310  
136.9983  
135.3733  
135.0414  
130.4434  
130.0013  
129.5028  
128.9966  
128.5765  
127.4612  
127.3595  
127.3252  
126.8965  
125.5629  
124.9818  
121.5078  
112.8455  
112.8821  
111.2597

51.8476  
38.4305  
33.0369  
24.7555

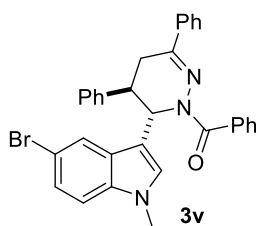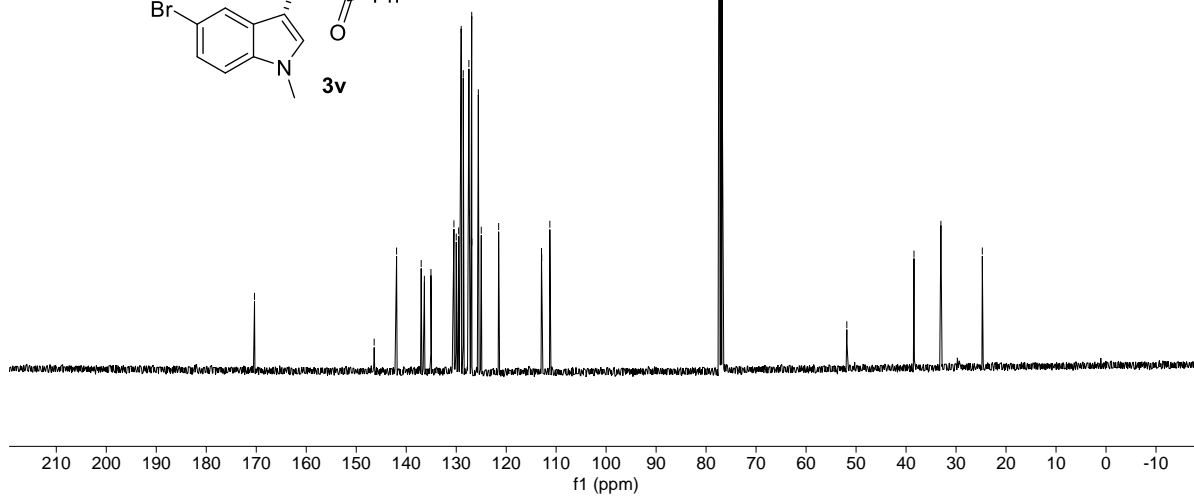

7.6831  
7.6675  
7.6491  
7.5822  
7.4531  
7.4356  
7.4205  
7.4028  
7.3816  
7.3665  
7.3446  
7.3381  
7.3291  
7.2628  
7.2452  
7.2275  
7.1903  
7.1895  
7.0976  
7.0805  
-6.6962  
-6.3531

4.0103  
3.9924  
-3.6093  
2.9611  
2.9156  
2.8633  
2.8459  
2.8176  
2.8003  
2.5248

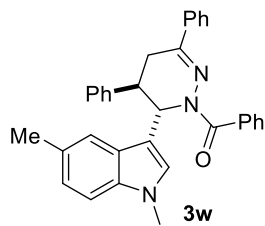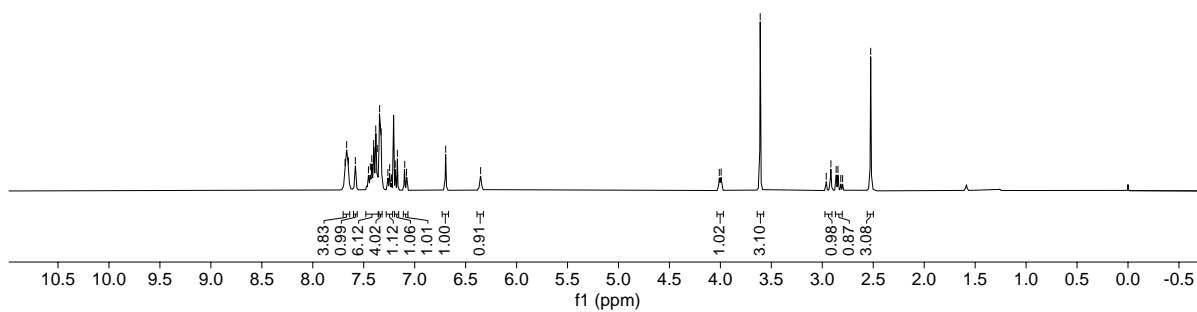

170.2381  
146.2246  
142.2621  
137.1010  
136.0893  
135.2355  
130.1970  
129.8945  
129.2864  
128.8451  
128.5330  
128.4521  
127.3315  
127.1284  
126.8589  
126.0209  
125.4734  
125.3856  
123.6063  
118.5236  
112.5622  
109.3565  
-52.0001  
-38.2453  
-32.7716  
-24.7021  
-21.5963

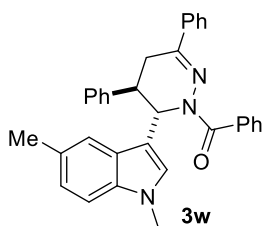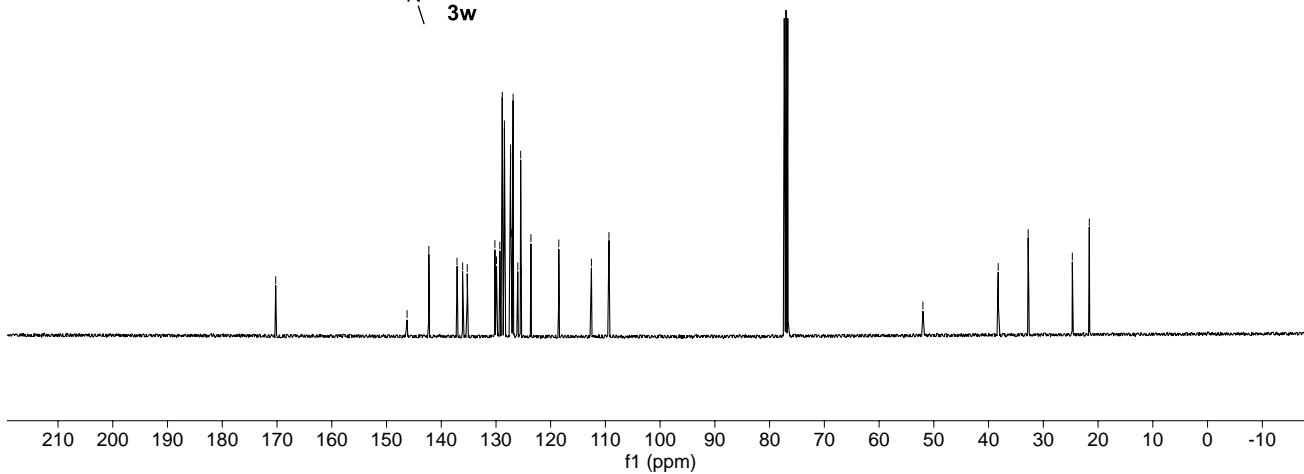

7.6848  
7.6785  
7.6691  
7.6600  
7.4674  
7.4496  
7.4315  
7.4128  
7.3955  
7.3652  
7.3598  
7.3565  
7.3503  
7.3429  
7.3389  
7.3291  
7.2275  
7.2215  
7.2040  
7.1819  
6.9444  
6.9384  
6.9222  
6.9162  
6.7474

3.9882  
3.9505  
3.8883  
3.6363  
2.9804  
2.9348  
2.8921  
2.8749  
2.8465  
2.8292

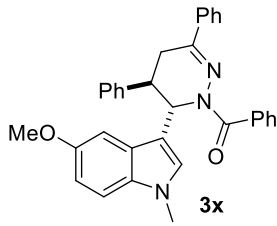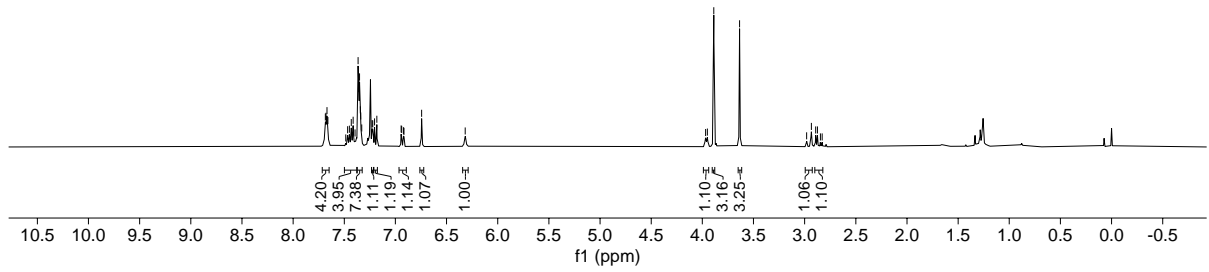

170.3664  
154.0201  
146.9676  
142.3517  
137.1186  
135.2700  
133.0869  
130.2943  
129.9567  
129.3971  
128.9626  
128.5331  
127.4147  
127.2386  
127.0000  
126.9029  
126.6408  
125.5414  
112.8101  
112.0545  
110.4713  
101.1190  
56.0906  
51.9541  
38.4554  
33.0086  
24.8538

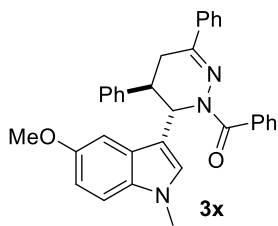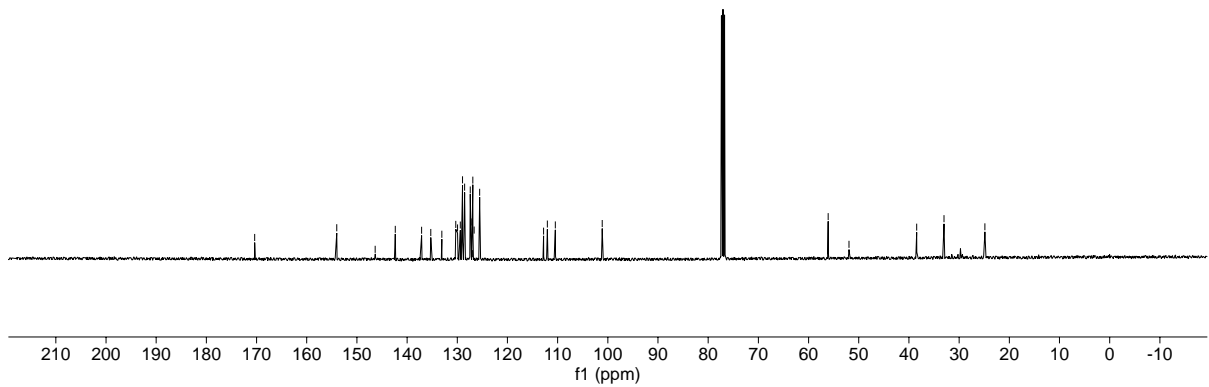

7.7557  
7.7517  
7.7339  
7.6954  
7.6755  
7.3870  
7.3826  
7.3695  
7.3650  
7.3500  
7.3205  
7.2943  
7.2843  
7.2336  
7.1995  
7.1924  
7.1758  
7.1605  
7.1062  
7.0850  
7.0815  
7.0685  
7.0650  
7.0617  
7.0485  
7.0450  
6.8375

4.5909  
4.5667

3.6370  
3.1023  
3.0863  
3.0567  
3.0407  
2.9596  
2.9345  
2.9142  
2.8890

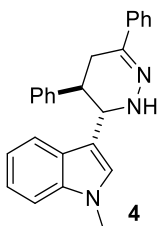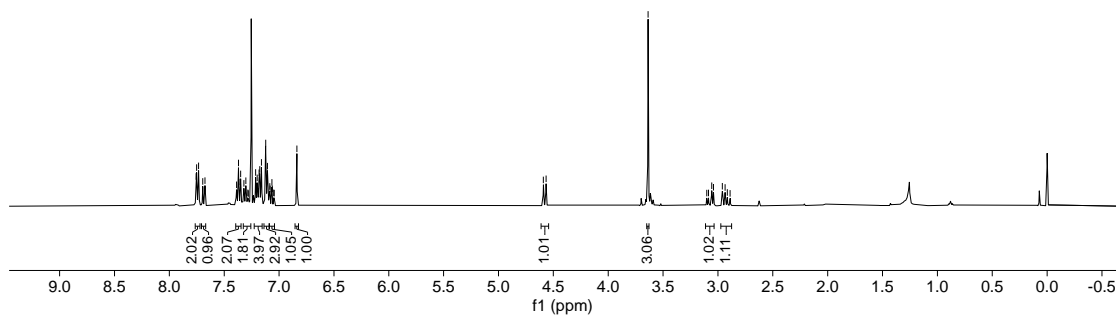

143.7340  
143.0443  
138.1489  
137.0458  
128.4747  
128.3633  
127.9434  
127.6873  
127.6543  
126.6117  
126.5999  
124.5009  
121.6419  
119.6409  
119.1016  
112.7399  
109.3126

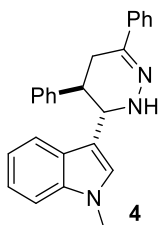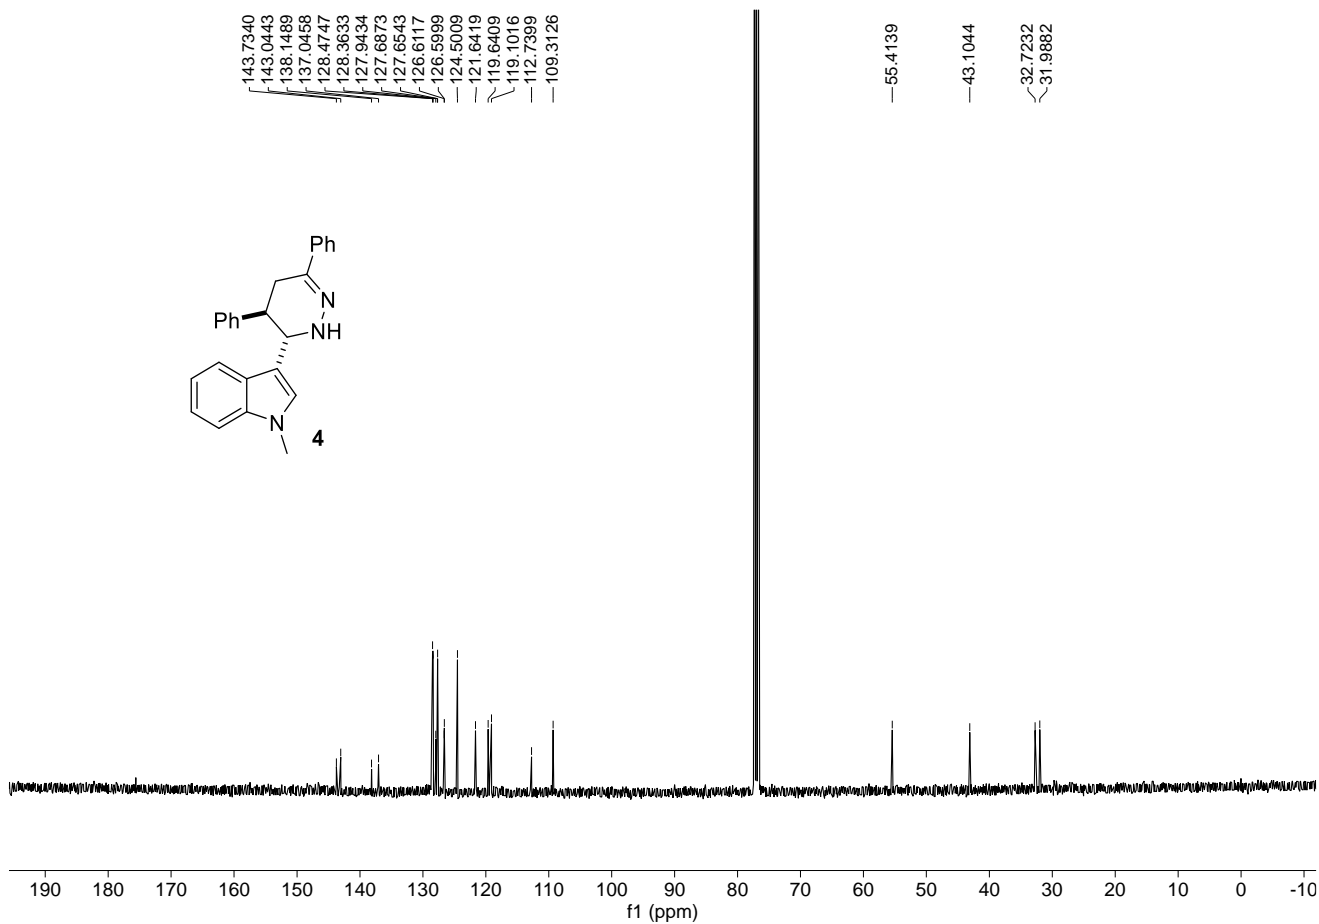

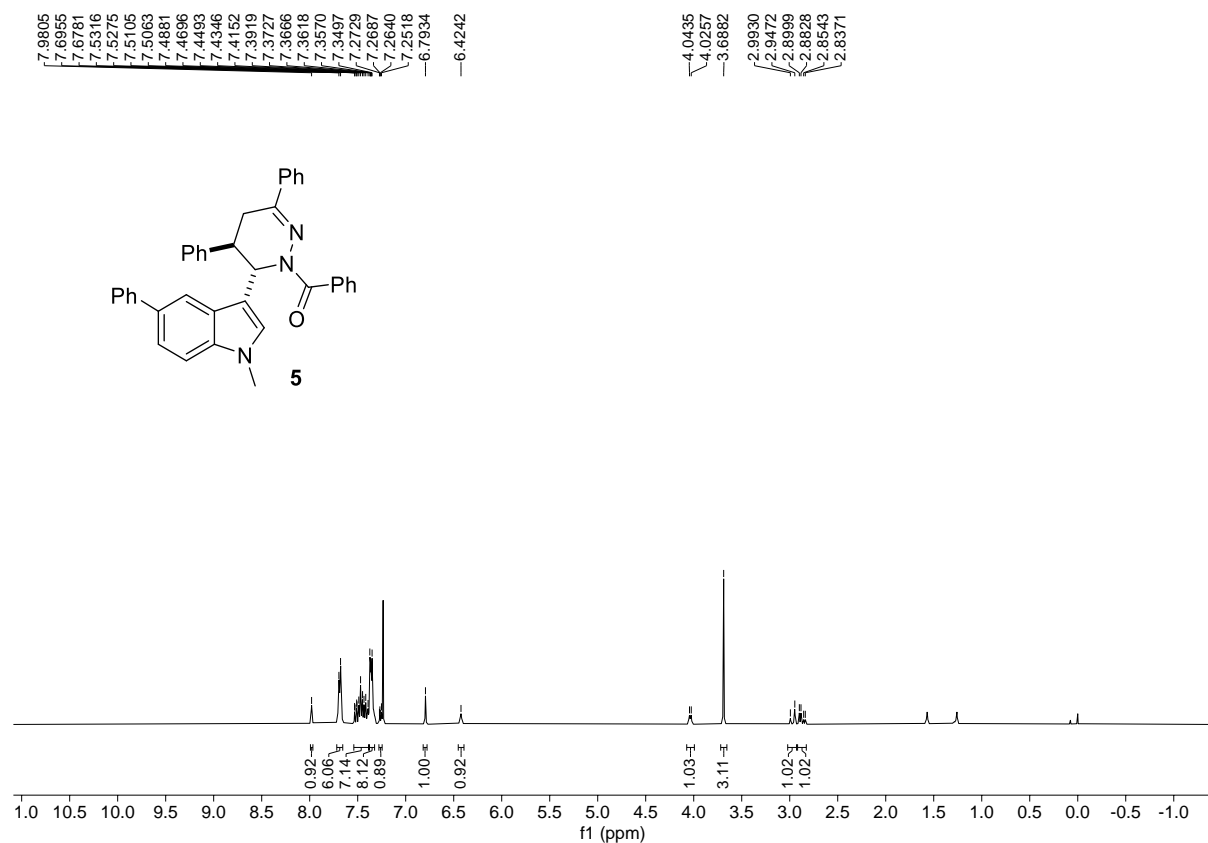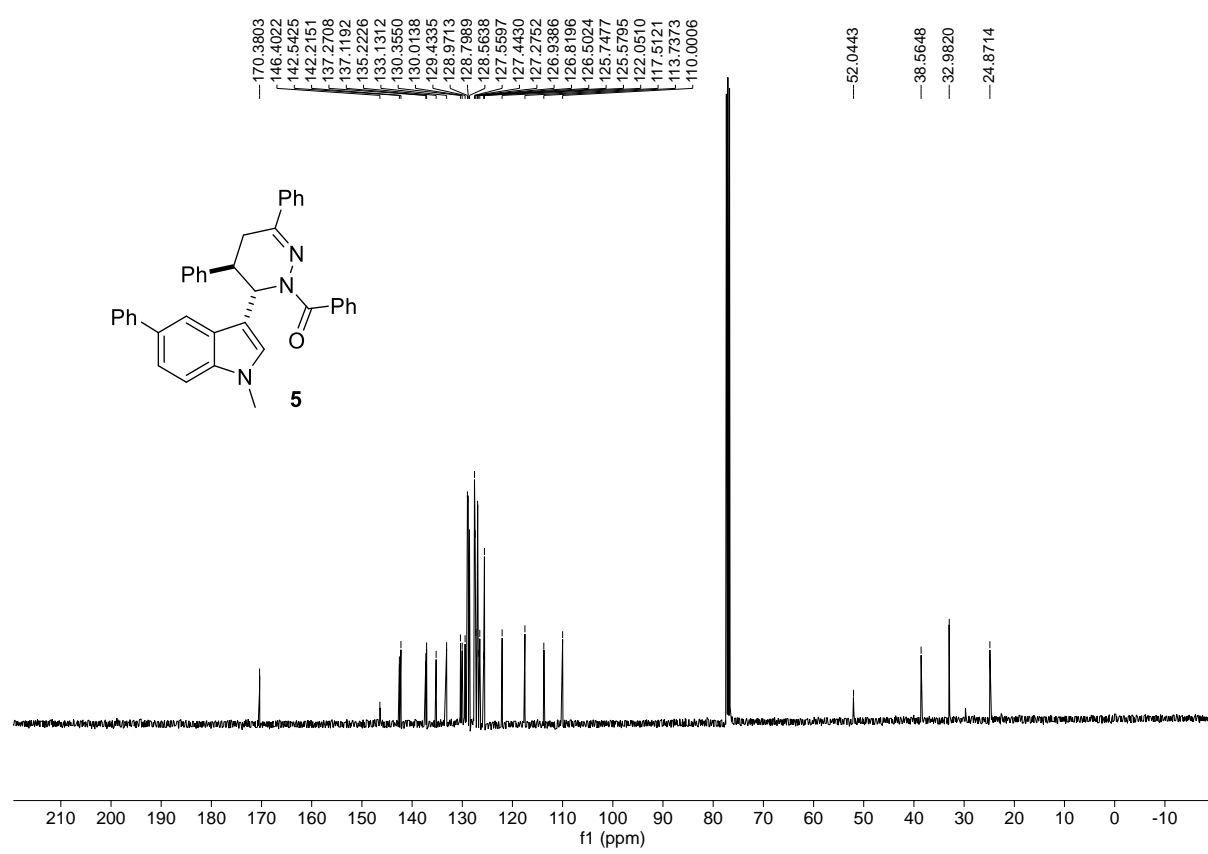

## IX. HPLC spectra

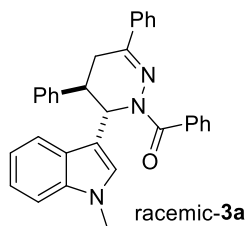

Data File E:\DATA\CTT\CTT\CTT-3A 2021-01-25 19-46-02\CTT-3a1.D  
 Sample Name: ctt-3a-rac

```

=====
Acq. Operator   : SYSTEM                      Seq. Line :    2
Acq. Instrument : 1260                        Location  :   31
Injection Date  : 1/25/2021 7:54:09 PM        Inj       :    1
                                           Inj Volume: 15.000 µl
Acq. Method     : E:\DATA\CTT\CTT\CTT-3A 2021-01-25 19-46-02\IE-60-40-1.2mL-15ul-alInm40min.M
Last changed    : 1/25/2021 7:46:02 PM by SYSTEM
Analysis Method : E:\DATA\CTT\CTT\CTT-3A 2021-01-25 19-46-02\IE-60-40-1.2mL-15ul-alInm40min.M (Sequence Method)
Last changed    : 1/28/2021 7:38:02 PM by SYSTEM
                 (modified after loading) (Current integration events modified)
Additional Info : Peak(s) manually integrated
  
```

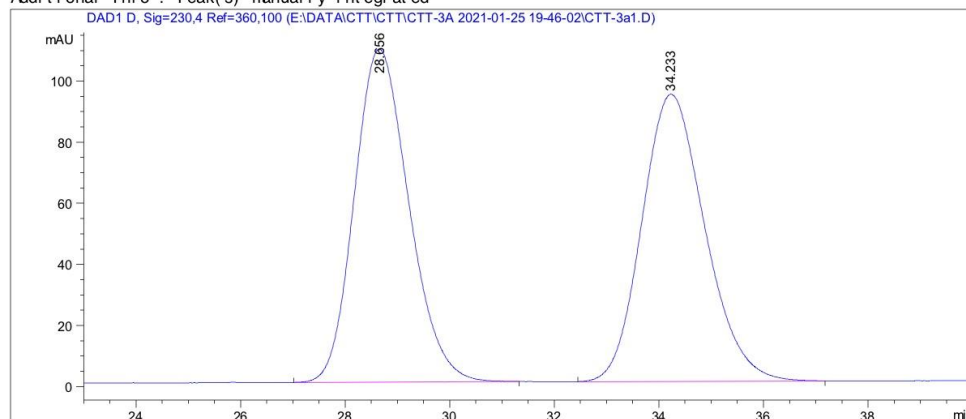

### Area Percent Report

```

=====
Sorted By      : Signal
Multiplier     : 1.0000
Dilution       : 1.0000
Do not use Multiplier & Dilution Factor with ISTDs
  
```

Signal 1: DAD1.D, Sig=230,4 Ref=360,100

| Peak # | Ret Time [min] | Type | Width [min] | Area [mAU*s] | Height [mAU] | Area %  |
|--------|----------------|------|-------------|--------------|--------------|---------|
| 1      | 28.656         | BB   | 1.1053      | 7886.20508   | 109.09609    | 50.0699 |
| 2      | 34.233         | BB   | 1.2156      | 7864.18555   | 94.04229     | 49.9301 |

Totals : 1.57504e4 203.13838

\*\*\* End of Report \*\*\*

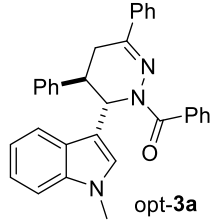

Data File: E:\DATA\CTT\CTT\CTT-3A 2021-01-25 19-46-02\CTT-3a2.D  
 Sample Name: ctt-3a-opt

```

=====
Acq. Operator   : SYSTEM                      Seq. Line :    3
Acq. Instrument : 1260                       Location  :   32
Injection Date  : 1/25/2021 8:35:07 PM       Inj       :    1
                                           Inj Volume: 15.000 µl
Acq. Method     : E:\DATA\CTT\CTT\CTT-3A 2021-01-25 19-46-02\IE-60-40-1.2mL-15ul-alInm-40min.M
Last changed    : 1/25/2021 7:46:02 PM by SYSTEM
Analysis Method : E:\DATA\CTT\CTT\CTT-3A 2021-01-25 19-46-02\IE-60-40-1.2mL-15ul-alInm-40min.M (Sequence Method)
Last changed    : 1/28/2021 7:38:02 PM by SYSTEM
                 (modified after loading) (Current integration events modified)
Additional Info : Peak(s) manually integrated
  
```

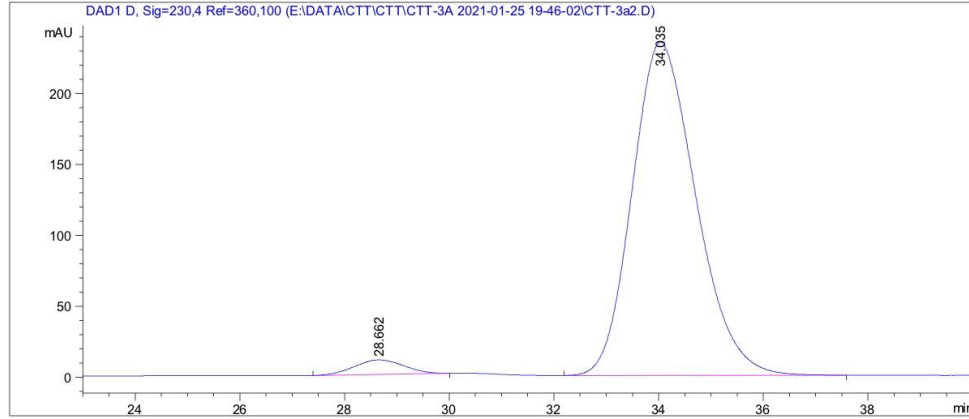

Area Percent Report

```

Sorted By      : Signal
Multiplier     : 1.0000
Dilution       : 1.0000
Do not use Multiplier & Dilution Factor with ISTDs
  
```

Signal 1: DAD1.D, Sig=230,4 Ref=360,100

| Peak # | Ret Time [min] | Type | Width [min] | Area [mAU*s] | Height [mAU] | Area %  |
|--------|----------------|------|-------------|--------------|--------------|---------|
| 1      | 28.662         | BB   | 0.7849      | 674.79413    | 10.21168     | 3.2908  |
| 2      | 34.035         | BB   | 1.2690      | 1.98307e4    | 234.87126    | 96.7092 |

Totals : 2.05055e4 245.08294

\*\*\* End of Report \*\*\*
